# Supplementary material
Source: MDPI journal article supplement (https://www.mdpi.com/1099-4300/23/7/874)
Supplement: s1 [file s1]

## Supplementary Material A

**Table S1.** The summary of MHAs

| No. | Algorithm Name                             | Authors                          | Published year | Total number<br>(average number per<br>year)<br>of published papers |
|-----|--------------------------------------------|----------------------------------|----------------|---------------------------------------------------------------------|
| 1   | Genetic Algorithm                          | John Holland                     | 1975           | 94381 (2051)                                                        |
| 2   | Particle Swarm Optimization Algorithm      | James Kennedy, et al.            | 1995           | 35021(1346)                                                         |
| 3   | Differential Evolution Algorithm           | Rainer Storn, et al.             | 1997           | 13801(575)                                                          |
| 4   | Ant Colony Optimization Algorithm          | Marco Dorigo, et al.             | 1992           | 9137(315)                                                           |
| 5   | Artificial Bee Colony Algorithm            | Dervis Karaboga                  | 2005           | 5067(316)                                                           |
| 6   | Immune Algorithm                           | Mori Kazuyuki, et al.            | 1991           | 4771(159)                                                           |
| 7   | Firefly Algorithm                          | K.N. Krishnanand, et al.         | 2008           | 2505(192)                                                           |
| 8   | Cuckoo Search Algorithm                    | Xin-She Yang, et al.             | 2009           | 2470(205)                                                           |
| 9   | Harmony Search Algorithm                   | Zong Woo Geem, et al.            | 2001           | 2001(100)                                                           |
| 10  | Bat Algorithm                              | Xin-She Yang                     | 2012           | 1725(191)                                                           |
| 11  | Gravitational Search Algorithm             | Esmat Rashedi, et al.            | 2009           | 1445(120)                                                           |
| 12  | Grey Wolf Optimization                     | Seyedali Mirjalili, et al.       | 2014           | 1105(157)                                                           |
| 13  | Biogeography-Based Optimization Algorithm  | Dan Simon                        | 2008           | 950(73)                                                             |
| 14  | The Bees Algorithms                        | D.T. Pham, et al.                | 2006           | 865(57)                                                             |
| 15  | Imperialist Competitive Algorithm          | Esmail Atashpaz-Gargari, et al.  | 2007           | 821(58)                                                             |
| 16  | Shuffled Frog Leaping Algorithm            | Muzaffar Eusuff, et al.          | 2003           | 762(42)                                                             |
| 17  | Artificial Fish Swarm Algorithm            | Dervis Karaboga                  | 1998           | 750(32)                                                             |
| 18  | Bacterial Foraging Optimization            | Kevin M. Passino                 | 2002           | 739(38)                                                             |
| 19  | Whale Optimization Algorithm               | Seyedali Mirjalili, et al.       | 2016           | 658(131)                                                            |
| 20  | Flower Pollination Algorithm               | Xin-She Yang                     | 2012           | 621(69)                                                             |
| 21  | Fruit Fly Optimization Algorithm           | Wen-Tsao Pan                     | 2012           | 583(64)                                                             |
| 22  | Firework Algorithm                         | Ying Tan, et al.                 | 2009           | 453(37)                                                             |
| 23  | BeeHive Algorithm                          | Horst F. Wedde, et al.           | 2004           | 422(24)                                                             |
| 24  | Differential Search Algorithm              | Pinar Civicioglu                 | 2012           | 396(44)                                                             |
| 25  | Brain Storm Optimization                   | Yuhui Shi                        | 2013           | 368(46)                                                             |
| 26  | Krill Herd Algorithm                       | Amir H Gandomi, et al.           | 2012           | 290(32)                                                             |
| 27  | Big Bang–Big Crunch Algorithm              | Osman K. Erol, et al.            | 2005           | 275(17)                                                             |
| 28  | Invasive Weed Optimization Algorithm       | A. R. Mehrabian, et al.          | 2006           | 229(15)                                                             |
| 29  | Water Cycle Algorithm                      | Hadi Eskandar, et al.            | 2012           | 218(24)                                                             |
| 30  | Symbiotic Organisms Search Algorithm       | Cheng Min Yuan, et al.           | 2014           | 205(29)                                                             |
| 31  | Crow Search Algorithm                      | Alireza Askarzadeh               | 2016           | 202(40)                                                             |
| 32  | Lion Algorithm                             | Maziar Yazdani, et al.           | 2015           | 197(32)                                                             |
| 33  | Search Group Algorithm                     | Matheus Silva Goncalves, et al.  | 2015           | 191(31)                                                             |
| 34  | Intelligent Water Drops Algorithm          | Hamed Shah_Hossinie              | 2007           | 187(13)                                                             |
| 35  | Grasshopper Optimization Algorithm         | Seyedeh Zahra Mirjalili1, et al. | 2018           | 180(60)                                                             |
| 36  | Moth-Flame Optimization Algorithm          | Seyedali Mirjalili               | 2015           | 177(29)                                                             |
| 37  | Black Hole Algorithm                       | Abdolreza Hatamlou, et al.       | 2013           | 175(21)                                                             |
| 38  | Charged System Search Algorithm            | A. Kaveh, et al.                 | 2010           | 164(14)                                                             |
| 39  | Glowworm Swarm Optimization Algorithm      | K.N. Krishnanand, et al.         | 2005           | 164(10)                                                             |
| 40  | Monkey Algorithm                           | Ye Zhen cheng, et al.            | 2007           | 162(11)                                                             |
| 41  | Geometric Partitioning Algorithm           | Wang Tao, et al.                 | 2012           | 159(7)                                                              |
| 42  | Backtracking Search Optimization Algorithm | Pinar Civicioglu                 | 2013           | 139(17)                                                             |
| 43  | Chicken Swarm Optimization Algorithm       | Xianbing Meng, et al.            | 2014           | 135(19)                                                             |
| 44  | Hunting Search Algorithm                   | R. Oftadeh, et al.               | 2010           | 131(11)                                                             |

|    |                                               |                                  |      |         |
|----|-----------------------------------------------|----------------------------------|------|---------|
| 45 | Chemical Reaction Optimization Algorithm      | Nazmul Siddique, et al.          | 2017 | 124(31) |
| 46 | Cat Swarm Optimization Algorithm              | Shu Chuan Chu, et al.            | 2006 | 118(7)  |
| 47 | Bumblebees Algorithm                          | Francesc Comellas, et al.        | 2003 | 98(8)   |
| 48 | Migrating Birds Optimization Algorithm        | Ekrem Duman, et al.              | 2012 | 95(10)  |
| 49 | Stochastic Fractal Search Algorithm           | Hamid Salimi                     | 2015 | 92(15)  |
| 50 | Central Force Optimization Algorithm          | R. A. Formato, et al.            | 2007 | 90(6)   |
| 51 | Virtual Ant Algorithm                         | Xin-She Yang, et al.             | 2006 | 81(5)   |
| 52 | Wolf Search Algorithm                         | Rui Tang, Simon Fong, et al.     | 2013 | 77(8)   |
| 53 | Colliding Bodies Optimization Algorithm       | A. Kaveh, et al.                 | 2014 | 74(10)  |
| 54 | Lightning Search Algorithm                    | Hussain Shareef, et al.          | 1999 | 65(10)  |
| 55 | Artificial Plant Optimization Algorithm       | Liu Kun                          | 2013 | 65(8)   |
| 56 | Bird Swarm Algorithm                          | Xian-Bing Meng, et al.           | 2016 | 59(11)  |
| 57 | Pigeon-Inspired Optimization Algorithm        | Haibin Duan, et al.              | 2014 | 59(8)   |
| 58 | Sheep Optimization Algorithm                  | Robert Sawko, et al.             | 2008 | 52(4)   |
| 59 | Shark Algorithm                               | Michael Hersovici, et al.        | 1998 | 51(2)   |
| 60 | Virus Optimization Algorithm                  | Yun-Chia Liang, et al.           | 2016 | 50(10)  |
| 61 | Self-Driven Particles Algorithm               | Tamas Vicsek, et al.             | 1995 | 49(1)   |
| 62 | Japanese Tree Frogs Algorithm                 | Hugo Hernández                   | 2012 | 48(5)   |
| 63 | League Championship Algorithm                 | Ali Husseinzadeh Kashan          | 2009 | 48(4)   |
| 64 | Group Search Optimizer Algorithm              | He S, et al.                     | 2006 | 47(3)   |
| 65 | Vortex Search Algorithm                       | Berat Dog'an, et al.             | 2015 | 45(7)   |
| 66 | Spider Monkey Optimization Algorithm          | Jagdish Chand Bansal, et al.     | 2014 | 42(6)   |
| 67 | Multi-Verse Optimizer Algorithm               | Hatamlou, Abdolreza, Mirjalili   | 2016 | 35(7)   |
| 68 | River Formation Dynamics Algorithm            | Pablo Rabanal                    | 2007 | 33(2)   |
| 69 | Gradient Evolution Algorithm                  | R.J. Kuo, et al.                 | 2015 | 31(5)   |
| 70 | Social Emotional Optimization Algorithm       | Subhransu Sekhar Dash            | 2010 | 30(2)   |
| 71 | Marriage in Honey-bees Optimization Algorithm | Hussein A. Abbass                | 2001 | 30(1)   |
| 72 | Wasp Algorithm                                | Guy Thbr Aulal, et al.           | 1991 | 29(0)   |
| 73 | Photosynthetic Algorithm                      | Haruhiko Murase                  | 2000 | 29(1)   |
| 74 | Method of Musical Composition Algorithm       | Roman Anselmo Mora-Gutiérrez     | 2014 | 28(4)   |
| 75 | Golden ball Algorithm                         | E. Osaba                         | 2014 | 27(3)   |
| 76 | Electro-Magnetism Optimization Algorithm      | Erik Cuevas, et al.              | 2011 | 27(2)   |
| 77 | Stochastic Searching Networks Algorithm       | John.Mark. Bishop                | 1989 | 27(0)   |
| 78 | The Ant Lion Optimizer Algorithm              | Liping Xie                       | 2015 | 21(3)   |
| 79 | Car Tracking Optimization Algorithm           | Jian Chen                        | 2018 | 19(6)   |
| 80 | Hierarchical Swarm Model Algorithm            | Hanning Chen, et al.             | 2010 | 19(1)   |
| 81 | Galaxy-based Search Algorithm                 | Hamed Shah-Hosseini              | 2011 | 18(1)   |
| 82 | Paddy Field Algorithm                         | Upeka Premaratne, et al.         | 2009 | 18(1)   |
| 83 | Dolphin Echolocation Algorithm                | A. Kaveh, et al.                 | 2013 | 17(2)   |
| 84 | Human Mental Search Algorithm                 | Seyed Jaleleddin Mousavirad      | 2017 | 16(4)   |
| 85 | Biology Migration Algorithm                   | Qingyang Zhang                   | 2019 | 15(7)   |
| 86 | Artificial Cooperative Search Algorithm       | Pinar Civicioglu                 | 2013 | 15(1)   |
| 87 | Queen-bee Evolution Algorithm                 | Sung Hoon Jung                   | 2003 | 15(0)   |
| 88 | Eagles Strategy Algorithm                     | Xin-She Yang                     | 2010 | 14(1)   |
| 89 | Wisdom of Artificial Crowds Algorithm         | Roman Yampolskiy                 | 2012 | 14(1)   |
| 90 | Group Area Search Algorithm                   | Liu Changjun, et al.             | 2013 | 13(1)   |
| 91 | Bean Optimization Algorithm                   | Xiaoming Zhang, et al.           | 2010 | 12(1)   |
| 92 | Consultant-Guided Search Algorithm            | Serban Iordache                  | 2010 | 12(1)   |
| 93 | Natural Aggregation Algorithm                 | Fengji Luo                       | 2016 | 11(2)   |
| 94 | Human-Inspired Algorithms                     | Luna Mingyi Zhang, et al.        | 2009 | 11(0)   |
| 95 | Cooperative Bees Swarm Algorithm              | Habiba Drias, et al.             | 2005 | 11(0)   |
| 96 | Ecology-Inspired Optimization Algorithm       | Rafael Stubbs Parpinelli, et al. | 2011 | 10(1)   |

|     |                                                 |                              |      |      |
|-----|-------------------------------------------------|------------------------------|------|------|
| 97  | Virus Colony Search Algorithm                   | Mu Dong Li                   | 2016 | 9(1) |
| 98  | Anarchic Society Optimization Algorithm         | Hossein Shayeghi, et al.     | 2012 | 9(1) |
| 99  | Roach Infestation Optimization Algorithm        | Timothy C. Havens            | 2008 | 9(0) |
| 100 | Emperor Penguins Colony Algorithm               | Sasan Harifi                 | 2019 | 8(4) |
| 101 | Amoeba Based Algorithm                          | Yajuan Zhang, et al.         | 2012 | 8(0) |
| 102 | Egyptian Vulture Optimization Algorithm         | Chiranjib Sur, et al.        | 2013 | 7(0) |
| 103 | Synergistic Fibroblast Optimization Algorithm   | TT DHIVYAPRABHA              | 2018 | 6(2) |
| 104 | Termite Colony Optimization Algorithm           | Ramin Hedayatzadeh, et al.   | 2010 | 6(0) |
| 105 | Slime Mould Optimization Algorithm              | David. Monismith, et al.     | 2008 | 6(0) |
| 106 | Doves Algorithm                                 | Mu-ChunSua, et al.           | 2009 | 5(0) |
| 107 | Virtual Bee Algorithm                           | Xin-She Yang, et al.         | 2005 | 5(0) |
| 108 | Hydrozoan Algorithm                             | Daranat Tansui, et al.       | 2017 | 4(1) |
| 109 | Football Game Algorithm                         | Elyas Fadakar, et al.        | 2016 | 4(0) |
| 110 | Weightless Swarm Algorithm                      | Ting, et al.                 | 2012 | 4(0) |
| 111 | The Great Salmon Run Algorithm                  | Ahmad Mozaffari, et al.      | 2012 | 4(0) |
| 112 | Fast Bacterial Swarming Algorithm               | Ying Chu, et al.             | 2008 | 4(0) |
| 113 | Dynamic Partition Search Algorithm              | Gaoji Sun, et al.            | 2014 | 3(0) |
| 114 | Bat Sonar Optimization Algorithm                | Dr. Mohammed, et al.         | 2012 | 3(0) |
| 115 | Spiral Dynamics Inspired Optimization Algorithm | Kenichi Tamura, et al.       | 2010 | 3(0) |
| 116 | Monarchy Metaheuristic Algorithm                | Ibtissam Ahmia               | 2019 | 2(1) |
| 117 | Pity Beetle Algorithm                           | Nikos Ath. Kallioras, et al. | 2018 | 2(0) |
| 118 | Eel Swarm Intelligence Algorithm                | Yaosheng Sun, et al.         | 2014 | 2(0) |
| 119 | The OptBees Algorithm                           | Renato Dourado Maia, et al.  | 2012 | 2(0) |
| 120 | Good Lattice Swarm Algorithm                    | Shoubao Su, et al.           | 2007 | 2(0) |
| 121 | Artificial Physics Optimization Algorithm       | Liping Xie, et al.           | 2009 | 1(0) |
| 122 | Benchmarking-based Optimization Algorithm       | Seyedali Mirjalili, et al.   | 2014 | 0(0) |
| 123 | Spiral Milipede-Inspired Routing Algorithm      | Olufemi Adeluyi, et al.      | 2012 | 0(0) |
| 124 | Self-Organizing Migrating Algorithm             | Haruhiko Murase              | 2004 | 0(0) |

## Supplementary Material B

**Table S2** Experiments on GA, PSO, ABC, BA, IA, FA for F1~F10 functions under D=10 on parameters I

| Problems | Criteria | GA         | PSO           | ABC         | BA            | IA             | FA          |
|----------|----------|------------|---------------|-------------|---------------|----------------|-------------|
| F1       | WORST    | 1150905.31 | 7389317157.72 | 13090309.85 | 1027533420.23 | 19522409138.11 | 24567892868 |
|          | AVERAGE  | 425280.20  | 4061797069.88 | 2354181.14  | 676040724.22  | 9126518156.35  | 15757912820 |
|          | BEST     | 86762.9280 | 2263632443.69 | 250424.37   | 396310175.71  | 3662679222.10  | 6164854714  |
|          | STD      | 358292.34  | 1305011625.0  | 2794239.66  | 189138604.50  | 4604858548.44  | 5628364779  |
| F2       | WORST    | 510.5488   | 2069.9649     | 329.6954    | 498.4525      | 12210.3822     | 14044.2535  |
|          | AVERAGE  | 340.0222   | 1330.5235     | 227.9535    | 404.9380      | 5102.5600      | 7390.9887   |
|          | BEST     | 236.9765   | 595.0111      | 201.8839    | 285.7611      | 1746.3919      | 2689.8312   |
|          | STD      | 72.4484    | 425.1034      | 29.3396     | 60.6307       | 2848.3579      | 2930.1923   |
| F3       | WORST    | 53174.2753 | 51188.3754    | 13552.5320  | 4457.3288     | 77441.3250     | 25927.7976  |
|          | AVERAGE  | 25524.9354 | 28271.2175    | 8625.3882   | 2553.8278     | 27603.4126     | 17336.2779  |
|          | BEST     | 7045.4792  | 10776.4717    | 3866.8109   | 1393.6205     | 8500.3786      | 9795.1880   |
|          | STD      | 13834.8458 | 11253.0904    | 2719.8883   | 731.8650      | 18631.4457     | 4133.6863   |
| F4       | WORST    | 483.0629   | 785.2114      | 408.5754    | 450.1486      | 1999.0264      | 3100.8899   |
|          | AVERAGE  | 429.4396   | 657.9673      | 405.9633    | 432.9008      | 1231.3359      | 1980.1695   |
|          | BEST     | 408.8489   | 522.2490      | 400.8356    | 418.3189      | 610.8229       | 682.4590    |
|          | STD      | 26.4812    | 76.3839       | 2.0759      | 8.6482        | 472.0341       | 712.7876    |
| F5       | WORST    | 560.9378   | 587.9662      | 526.5166    | 544.7179      | 647.3552       | 634.2078    |
|          | AVERAGE  | 549.7743   | 576.2792      | 516.1518    | 537.1692      | 592.5278       | 613.7647    |
|          | BEST     | 540.1125   | 566.5143      | 509.1870    | 528.6138      | 553.0772       | 594.6531    |
|          | STD      | 6.6747     | 5.6608        | 4.9900      | 4.5430        | 23.1560        | 11.8276     |
| F6       | WORST    | 634.4364   | 663.2841      | 601.9021    | 633.0003      | 684.6893       | 668.3584    |
|          | AVERAGE  | 627.9288   | 647.3828      | 600.9950    | 619.5374      | 654.0561       | 657.6453    |
|          | BEST     | 614.8519   | 631.5171      | 600.5439    | 609.0952      | 631.5448       | 646.7685    |
|          | STD      | 4.8505     | 7.0669        | 0.3112      | 5.5501        | 14.8853        | 5.0797      |
| F7       | WORST    | 842.9314   | 1064.1771     | 747.3148    | 807.5003      | 862.9237       | 1143.9438   |
|          | AVERAGE  | 788.6708   | 956.5695      | 733.9866    | 792.5893      | 847.3867       | 1073.7316   |
|          | BEST     | 763.6542   | 888.5229      | 719.9530    | 769.4571      | 816.7369       | 924.9750    |
|          | STD      | 21.3411    | 45.6912       | 6.4024      | 12.2652       | 17.7236        | 46.8772     |
| F8       | WORST    | 883.5876   | 911.1776      | 826.1870    | 848.7434      | 915.3350       | 911.2001    |
|          | AVERAGE  | 859.2423   | 892.5746      | 816.1858    | 838.6272      | 882.3561       | 889.0791    |
|          | BEST     | 841.2022   | 867.8461      | 805.8347    | 817.5070      | 854.7085       | 865.6985    |
|          | STD      | 11.4949    | 11.7009       | 5.3027      | 8.0652        | 15.9224        | 10.3804     |
| F9       | WORST    | 1415.5520  | 3718.2530     | 993.5717    | 1155.4899     | 3690.5738      | 2655.3771   |
|          | AVERAGE  | 995.2913   | 2519.1250     | 921.8393    | 1093.6353     | 2104.1593      | 2149.4344   |
|          | BEST     | 905.9393   | 1630.3400     | 901.0264    | 990.0752      | 1120.4522      | 1846.1460   |
|          | STD      | 138.5490   | 612.0259      | 22.3470     | 40.8872       | 731.5220       | 194.3117    |
| F10      | WORST    | 2155.7415  | 2734.0386     | 1845.1448   | 2831.3932     | 3674.0820      | 2564.8308   |

|         |           |           |                  |           |           |           |
|---------|-----------|-----------|------------------|-----------|-----------|-----------|
| AVERAGE | 1732.3176 | 2235.8698 | 1512.4645        | 2314.1281 | 3129.6479 | 2416.1235 |
| BEST    | 1216.8176 | 1762.1202 | <b>1068.9142</b> | 1880.2042 | 2568.2145 | 2150.4408 |
| STD     | 262.0993  | 281.4933  | 159.2519         | 209.5393  | 320.4662  | 93.4708   |

**Table S3.** Experiments on GA, PSO, ABC, BA, IA, FA for F11~F20 functions under D=10 on parameters I

| Problems | Criteria | GA         | PSO          | ABC         | BA           | IA             | FA             |
|----------|----------|------------|--------------|-------------|--------------|----------------|----------------|
| F11      | WORST    | 3353.3490  | 2997.1209    | 1194.2442   | 1390.6776    | 21983.6778     | 3996.4441      |
|          | AVERAGE  | 1677.2785  | 1948.4840    | 1132.5766   | 1232.4689    | 9105.3149      | 2263.2036      |
|          | BEST     | 1136.2457  | 1411.8020    | 1109.5843   | 1147.2468    | 1793.8031      | 1568.1480      |
|          | STD      | 548.1344   | 484.4845     | 22.0899     | 51.8267      | 6693.3168      | 617.2291       |
| F12      | WORST    | 6282328.45 | 220621427.43 | 2941151.62  | 22326028.35  | 1504967593.27  | 2462273071.75  |
|          | AVERAGE  | 1265601.47 | 49805930.83  | 758542.9017 | 11784892.18  | 624969107.63   | 1232646467.20  |
|          | BEST     | 28827.8882 | 5967577.07   | 42784.9439  | 1172436.3388 | 90899112.6105  | 201224957.66   |
|          | STD      | 1559534.71 | 47998812.51  | 708355.8747 | 6320601.7430 | 395348418.65   | 633009084.78   |
| F13      | WORST    | 32435.1995 | 615234.3909  | 11929.5318  | 142455.3071  | 274626626.33   | 80247034.8915  |
|          | AVERAGE  | 13860.7592 | 186693.3386  | 5265.9325   | 51456.3270   | 75763924.2218  | 17790281.9103  |
|          | BEST     | 1536.7336  | 5059.5831    | 1646.4193   | 13980.4509   | 11662305.2984  | 17566.3000     |
|          | STD      | 10334.5952 | 168118.5267  | 3517.0810   | 37856.7449   | 73781855.1350  | 27397284.9648  |
| F14      | WORST    | 27221.1091 | 28900.8339   | 2101.9929   | 1688.8978    | 12519030.0478  | 1655.1740      |
|          | AVERAGE  | 7299.8736  | 4862.3112    | 1632.3267   | 1580.9151    | 1944836.3496   | 1512.3914      |
|          | BEST     | 1501.9967  | 1587.1991    | 1448.8388   | 1497.4601    | 18368.5321     | 1449.4438      |
|          | STD      | 7707.0313  | 8247.2709    | 158.0399    | 56.8970      | 3450011.6671   | 42.6433        |
| F15      | WORST    | 30619.5770 | 105730.0253  | 4138.2424   | 3212.4854    | 58424093.5581  | 3918.1309      |
|          | AVERAGE  | 10932.5250 | 24796.3325   | 2076.6279   | 2160.9289    | 5603756.1876   | 2732.1827      |
|          | BEST     | 1581.0748  | 3691.2019    | 1529.3037   | 1695.4598    | 6985.5035      | 1714.6526      |
|          | STD      | 8660.6754  | 29221.9159   | 600.7164    | 364.0046     | 13179865.8357  | 599.1658       |
| F16      | WORST    | 1884.1099  | 2283.8358    | 1775.3202   | 2041.9821    | 2631.6118      | 2234.0749      |
|          | AVERAGE  | 1705.3944  | 1814.9102    | 1647.5307   | 1761.8586    | 2428.9696      | 2078.5403      |
|          | BEST     | 1612.6808  | 1675.0240    | 1602.4200   | 1643.5171    | 2187.2968      | 1952.2365      |
|          | STD      | 74.6605    | 156.2032     | 58.3401     | 103.6142     | 140.9550       | 65.7681        |
| F17      | WORST    | 2018.4012  | 2035.0278    | 1741.9899   | 1915.8444    | 2443.2917      | 1930.1460      |
|          | AVERAGE  | 1848.1348  | 1910.8404    | 1723.9229   | 1807.7611    | 2160.5021      | 1867.7808      |
|          | BEST     | 1740.3957  | 1838.7942    | 1706.4679   | 1759.8889    | 1837.9512      | 1818.0702      |
|          | STD      | 87.8723    | 57.5464      | 10.0700     | 49.6962      | 167.2660       | 33.1343        |
| F18      | WORST    | 49760.1523 | 681900.8684  | 14226.3850  | 135728.7307  | 533962678.7152 | 634665647.3193 |
|          | AVERAGE  | 24591.2130 | 210705.3632  | 7185.4712   | 64511.1417   | 165388172.1147 | 185214454.9991 |
|          | BEST     | 4159.9881  | 25120.5492   | 2680.6584   | 23433.1446   | 16414814.4300  | 171011.0796    |
|          | STD      | 12381.5985 | 165643.7742  | 3412.5392   | 32304.8311   | 127803083.7206 | 188934511.7444 |
| F19      | WORST    | 55900.1926 | 116776.0306  | 5679.8513   | 3884.8641    | 60141848.9793  | 17050.0611     |
|          | AVERAGE  | 22373.7347 | 46962.2062   | 2633.8915   | 2448.0523    | 9668878.1133   | 4090.2412      |
|          | BEST     | 2940.0687  | 6653.3830    | 1905.3740   | 1967.5159    | 22690.5086     | 2168.9346      |

|     |         |            |            |           |           |               |           |
|-----|---------|------------|------------|-----------|-----------|---------------|-----------|
|     | STD     | 13907.3118 | 35110.9179 | 1151.9552 | 433.1006  | 14653229.0686 | 3330.2050 |
|     | WORST   | 2086.7142  | 2280.1753  | 2039.8808 | 2268.9464 | 2500.3711     | 2185.1786 |
| F20 | AVERAGE | 2063.3257  | 2171.6234  | 2019.2384 | 2130.5784 | 2355.8805     | 2137.2706 |
|     | BEST    | 2029.9650  | 2111.7484  | 2006.3129 | 2057.9973 | 2254.5836     | 2110.3324 |
|     | STD     | 18.6114    | 46.6752    | 9.4352    | 68.5744   | 70.7073       | 22.2044   |

**Table S4.** Experiments on GA, PSO, ABC, BA, IA, FA for F21~F30 functions under D=10 on parameters I

| Problems | Criteria | GA        | PSO       | ABC              | BA        | IA        | FA        |
|----------|----------|-----------|-----------|------------------|-----------|-----------|-----------|
|          | WORST    | 2383.3995 | 2388.4116 | 2236.6934        | 2346.6081 | 2434.0625 | 2410.7712 |
| F21      | AVERAGE  | 2322.7791 | 2311.8950 | 2216.4960        | 2279.6901 | 2368.6747 | 2365.9808 |
|          | BEST     | 2237.2227 | 2210.1488 | 2207.2762        | 2205.0324 | 2244.7432 | 2309.6995 |
|          | STD      | 45.5403   | 77.6269   | 7.4739           | 67.8529   | 47.3273   | 32.0313   |
|          | WORST    | 3107.6506 | 3062.5508 | 2312.7478        | 2405.1075 | 3890.9314 | 3980.0724 |
| F22      | AVERAGE  | 2426.5363 | 2771.8942 | 2284.7347        | 2379.9976 | 3080.4960 | 3540.4211 |
|          | BEST     | 2340.4546 | 2413.6838 | 2229.3030        | 2310.4227 | 2544.6037 | 2983.8401 |
|          | STD      | 169.9893  | 178.6271  | 32.6404          | 22.7354   | 328.6690  | 322.8674  |
|          | WORST    | 2674.8114 | 2681.1163 | 2637.8162        | 2646.6399 | 2818.8945 | 2882.9671 |
| F23      | AVERAGE  | 2654.1820 | 2655.7074 | <b>2608.2473</b> | 2635.7399 | 2761.8516 | 2787.1895 |
|          | BEST     | 2638.4900 | 2626.9254 | <b>2306.4069</b> | 2625.4418 | 2708.8149 | 2721.5366 |
|          | STD      | 9.7890    | 14.0866   | 71.5485          | 5.6332    | 32.2214   | 36.6854   |
|          | WORST    | 2785.4920 | 2814.6161 | 2765.9581        | 2775.5834 | 3023.2086 | 3066.4693 |
| F24      | AVERAGE  | 2735.2686 | 2791.6850 | 2559.4864        | 2746.9556 | 2891.9558 | 2954.1071 |
|          | BEST     | 2649.4631 | 2684.6849 | <b>2471.6761</b> | 2575.7871 | 2839.9937 | 2856.0970 |
|          | STD      | 38.4258   | 26.6788   | 73.8090          | 57.9020   | 45.7179   | 51.7922   |
|          | WORST    | 3052.1987 | 3236.9447 | 2950.5040        | 2984.0308 | 3633.6171 | 4612.3968 |
| F25      | AVERAGE  | 2968.8807 | 3131.5508 | 2905.8115        | 2964.9468 | 3414.5731 | 3977.5321 |
|          | BEST     | 2947.1937 | 3063.7445 | 2666.6576        | 2940.9627 | 3160.2700 | 3407.6744 |
|          | STD      | 25.1891   | 55.1507   | 59.4794          | 10.9834   | 137.6877  | 385.8667  |
|          | WORST    | 3444.2525 | 4466.0241 | 3042.7033        | 4206.2604 | 4693.8968 | 4919.7016 |
| F26      | AVERAGE  | 3123.6607 | 3410.8699 | 2917.9066        | 3235.9838 | 4079.6370 | 4437.6681 |
|          | BEST     | 2994.6630 | 3196.0133 | 2627.6391        | 2995.7081 | 3534.1700 | 3663.4834 |
|          | STD      | 116.7816  | 370.3052  | 94.5920          | 409.2416  | 311.2601  | 295.0645  |
|          | WORST    | 3146.9655 | 3197.6933 | 3110.8552        | 3149.3789 | 3421.9789 | 3391.7328 |
| F27      | AVERAGE  | 3121.0589 | 3118.3969 | 3099.9426        | 3107.6904 | 3267.2788 | 3330.2157 |
|          | BEST     | 3108.3614 | 3099.5733 | 3090.8756        | 3093.7628 | 3190.9502 | 3217.9308 |
|          | STD      | 9.0553    | 21.7855   | 5.2998           | 21.1648   | 63.5154   | 43.9582   |
|          | WORST    | 3614.7569 | 3598.0386 | 3404.0943        | 3413.6655 | 4197.2400 | 4103.4389 |
| F28      | AVERAGE  | 3495.9560 | 3401.9032 | 3225.7791        | 3321.6842 | 3827.6599 | 3906.3532 |
|          | BEST     | 3379.1433 | 3247.0705 | <b>2875.2363</b> | 3178.5999 | 3641.5615 | 3466.7687 |
|          | STD      | 50.6673   | 101.5109  | 133.9791         | 103.7884  | 155.0943  | 161.4183  |
| F29      | WORST    | 3245.4526 | 3426.3549 | 3254.5656        | 3464.9360 | 3978.0528 | 3543.1881 |

|     |         |              |              |                  |             |                |               |
|-----|---------|--------------|--------------|------------------|-------------|----------------|---------------|
|     | AVERAGE | 3210.9784    | 3275.6124    | 3189.7916        | 3238.7054   | 3629.4766      | 3428.6484     |
|     | BEST    | 3189.8046    | 3151.6736    | <b>3140.4775</b> | 3147.7312   | 3318.7383      | 3331.2090     |
|     | STD     | 15.8149      | 81.4955      | 25.2171          | 76.7546     | 169.6030       | 58.2207       |
|     | WORST   | 3072936.6765 | 11210758.89  | 552790.08        | 1527340.374 | 199505652.5509 | 58588552.6398 |
| F30 | AVERAGE | 1082755.3607 | 1684810.1599 | 178867.64        | 655207.9021 | 41744446.4872  | 30975573.0320 |
|     | BEST    | 6629.7662    | 52143.0255   | 5677.2070        | 58455.4728  | 1205508.9873   | 8379858.2903  |
|     | STD     | 872896.5529  | 2487976.5590 | 187681.3651      | 472315.9407 | 43532551.5594  | 14131455.0824 |

**Table S5.** Experiments on CS, DE, GSA, GWO, HS for F1-F10 functions under D=10 on parameters I

| Problems | Criteria | CS              | DE              | GSA             | GWO             | HS              |
|----------|----------|-----------------|-----------------|-----------------|-----------------|-----------------|
|          | WORST    | 14233.1777      | 17589.6524      | <b>785.5710</b> | 2290167.9016    | 1310786988.6210 |
| F1       | AVERAGE  | 4075.5846       | 5953.8654       | <b>246.2784</b> | 145710.2779     | 337264539.3872  |
|          | BEST     | 858.2665        | 150.7893        | <b>100.0402</b> | 2044.0964       | 73807584.4212   |
|          | STD      | 3464.8392       | 5275.6475       | <b>201.9534</b> | 507470.7393     | 270821881.0885  |
|          | WORST    | <b>200.0001</b> | 201.7737        | 223.8595        | 691.5691        | 1570.8417       |
| F2       | AVERAGE  | <b>200.0000</b> | 200.1508        | 210.9144        | 294.8109        | 739.4699        |
|          | BEST     | <b>200.0000</b> | 200.0002        | 200.0004        | 202.2111        | 298.1408        |
|          | STD      | <b>0.0000</b>   | 0.3974          | 7.7134          | 102.0191        | 324.6140        |
|          | WORST    | <b>300.0001</b> | 12503.6313      | 9781.6505       | 4622.2197       | 39967.2188      |
| F3       | AVERAGE  | <b>300.0000</b> | 8353.7616       | 7573.7491       | 980.6740        | 24546.6108      |
|          | BEST     | <b>300.0000</b> | 3729.4307       | 5667.2279       | 305.1910        | 10700.5157      |
|          | STD      | <b>0.0000</b>   | 2699.7958       | 1106.2889       | 1107.4253       | 7950.6130       |
|          | WORST    | <b>400.7126</b> | 406.3778        | 406.3770        | 469.0736        | 492.1883        |
| F4       | AVERAGE  | <b>400.1050</b> | 404.1867        | 406.0047        | 414.2323        | 438.1227        |
|          | BEST     | <b>400.0052</b> | 401.0683        | 405.4452        | 403.0292        | 414.9925        |
|          | STD      | <b>0.1664</b>   | 1.4515          | 0.2380          | 17.9310         | 19.0861         |
|          | WORST    | 521.9772        | <b>509.9128</b> | 564.6718        | 522.9500        | 555.7782        |
| F5       | AVERAGE  | 513.8265        | <b>506.6136</b> | 552.5062        | 510.4201        | 542.7490        |
|          | BEST     | 507.9959        | 503.5275        | 539.7982        | <b>502.3771</b> | 530.5926        |
|          | STD      | 3.6416          | <b>1.6994</b>   | 6.5187          | 5.3371          | 6.8470          |
|          | WORST    | 609.8465        | <b>600.0000</b> | 632.8836        | 603.9241        | 613.5079        |
| F6       | AVERAGE  | 604.6775        | <b>600.0000</b> | 617.5319        | 600.7298        | 606.1549        |
|          | BEST     | 601.6286        | <b>600.0000</b> | 600.8382        | 600.0344        | 603.0252        |
|          | STD      | 1.6299          | <b>0.0000</b>   | 10.0255         | 1.0251          | 2.2500          |
|          | WORST    | 735.7535        | 721.5861        | <b>714.4581</b> | 742.3353        | 779.6371        |
| F7       | AVERAGE  | 727.9220        | 718.1928        | <b>712.0854</b> | 726.6737        | 766.5767        |
|          | BEST     | 722.8397        | 714.7708        | <b>710.8203</b> | 717.6123        | 754.8371        |
|          | STD      | 3.1227          | 1.9051          | <b>0.9790</b>   | 8.0591          | 8.2094          |
|          | WORST    | 824.2729        | <b>810.3171</b> | 830.8437        | 823.8071        | 856.6085        |
| F8       | AVERAGE  | 816.7423        | <b>807.3141</b> | 820.0484        | 811.0093        | 841.5594        |
|          | BEST     | 810.6840        | 803.9091        | 815.9193        | <b>803.3253</b> | 822.7602        |

|     |         |                |                  |                 |           |           |
|-----|---------|----------------|------------------|-----------------|-----------|-----------|
|     | STD     | 4.0809         | <b>1.9776</b>    | 3.8368          | 5.1105    | 9.0382    |
| F9  | WORST   | 987.2820       | <b>900.0001</b>  | <b>900.0000</b> | 967.3987  | 1058.3039 |
|     | AVERAGE | 933.8048       | <b>900.0000</b>  | <b>900.0000</b> | 909.8875  | 982.6798  |
|     | BEST    | 911.9161       | <b>900.0000</b>  | <b>900.0000</b> | 900.0975  | 924.6963  |
|     | STD     | 18.0020        | <b>0.0000</b>    | <b>0.0000</b>   | 19.6313   | 36.9898   |
| F10 | WORST   | 1725.2153      | <b>1564.6709</b> | 3460.9346       | 1813.4370 | 3202.9820 |
|     | AVERAGE | 1527.3971      | <b>1413.7491</b> | 2764.3389       | 1468.9291 | 2927.5937 |
|     | BEST    | 1384.4228      | 1271.7443        | 2279.2205       | 1130.1008 | 2538.5848 |
|     | STD     | <b>81.9566</b> | 96.1555          | 351.4215        | 244.1845  | 169.0652  |

**Table S6.** Experiments on CS, DE, GSA, GWO, HS for F11~F20 functions under D=10 on parameters I

| Problems | Criteria | CS                | DE               | GSA          | GWO          | HS            |
|----------|----------|-------------------|------------------|--------------|--------------|---------------|
| F11      | WORST    | <b>1105.7660</b>  | 1105.7971        | 1151.2800    | 1135.6050    | 5022.8180     |
|          | AVERAGE  | <b>1103.4890</b>  | 1104.0129        | 1131.5425    | 1118.0141    | 2325.6969     |
|          | BEST     | 1101.7900         | <b>1101.3704</b> | 1120.6729    | 1102.8143    | 1313.3024     |
|          | STD      | <b>0.7746</b>     | 1.2477           | 9.3359       | 10.1489      | 850.8032      |
| F12      | WORST    | <b>10705.2573</b> | 640770.6102      | 1043728.6444 | 2304166.6132 | 60463726.2643 |
|          | AVERAGE  | <b>5134.2698</b>  | 207331.0752      | 490716.7255  | 483537.7758  | 17386067.0036 |
|          | BEST     | <b>3430.5345</b>  | 39281.7505       | 60363.9618   | 5738.9561    | 3531238.7047  |
|          | STD      | <b>1601.8829</b>  | 139808.3189      | 274456.7550  | 737717.4004  | 15065381.7795 |
| F13      | WORST    | <b>1331.7661</b>  | 8095.1641        | 14581.2820   | 21777.6479   | 807784.5468   |
|          | AVERAGE  | <b>1320.6429</b>  | 2837.2704        | 11475.7956   | 9483.2242    | 107074.9092   |
|          | BEST     | <b>1310.8958</b>  | 1521.8267        | 8733.2086    | 1734.0961    | 2565.8365     |
|          | STD      | <b>4.9694</b>     | 1515.9030        | 1779.7516    | 6107.9357    | 207807.3983   |
| F14      | WORST    | <b>1424.0463</b>  | 1440.6531        | 7264.0505    | 5138.3179    | 17316.7924    |
|          | AVERAGE  | <b>1417.4328</b>  | 1421.2708        | 5753.4619    | 2171.6217    | 6633.8174     |
|          | BEST     | 1410.4440         | <b>1401.6541</b> | 3567.9372    | 1442.6071    | 1804.7889     |
|          | STD      | <b>4.0560</b>     | 14.8257          | 987.0154     | 1450.8913    | 4506.0960     |
| F15      | WORST    | <b>1508.5940</b>  | 1558.2196        | 23656.4746   | 6402.5519    | 52567.8008    |
|          | AVERAGE  | <b>1505.5851</b>  | 1513.0359        | 17955.9153   | 2690.4346    | 10113.1895    |
|          | BEST     | 1503.2022         | <b>1502.9741</b> | 10304.6742   | 1533.7577    | 1905.6469     |
|          | STD      | <b>1.4880</b>     | 14.5767          | 3487.8542    | 1475.4496    | 11965.4781    |
| F16      | WORST    | <b>1606.0069</b>  | 1642.7469        | 2299.7861    | 1989.1093    | 2075.1343     |
|          | AVERAGE  | <b>1603.5827</b>  | 1618.1889        | 2161.0876    | 1702.0242    | 1909.9978     |
|          | BEST     | 1602.0553         | <b>1601.0955</b> | 2008.2307    | 1603.1961    | 1652.7973     |
|          | STD      | <b>1.1455</b>     | 13.1978          | 89.9219      | 116.4073     | 118.1956      |
| F17      | WORST    | 1730.3132         | <b>1727.1040</b> | 2038.7159    | 1780.0294    | 1911.2329     |
|          | AVERAGE  | 1725.9379         | <b>1718.3305</b> | 1822.0978    | 1743.8587    | 1790.0243     |
|          | BEST     | 1721.4572         | <b>1702.6249</b> | 1749.8039    | 1723.4557    | 1733.9237     |
|          | STD      | <b>2.4640</b>     | 8.8022           | 95.8370      | 14.0416      | 50.7967       |
| F18      | WORST    | <b>2034.4934</b>  | 3545.4771        | 16013.0753   | 53711.4207   | 1562573.3711  |



|     |         |                  |                  |            |            |             |
|-----|---------|------------------|------------------|------------|------------|-------------|
|     | AVERAGE | <b>1932.8899</b> | 2345.6735        | 7813.9717  | 30273.5435 | 205340.5501 |
|     | BEST    | 1862.9064        | <b>1822.3515</b> | 3354.6342  | 2459.5502  | 8705.5525   |
|     | STD     | <b>50.1570</b>   | 544.3537         | 3089.9456  | 14728.8071 | 358385.0949 |
|     | WORST   | <b>1907.1329</b> | 1912.4021        | 45113.6722 | 13703.3161 | 21433.3169  |
| F19 | AVERAGE | 1905.1992        | <b>1904.9616</b> | 31762.2989 | 4788.0776  | 6960.3624   |
|     | BEST    | 1903.2587        | <b>1900.2891</b> | 9933.5533  | 1915.5765  | 1991.1935   |
|     | STD     | <b>0.9630</b>    | 3.8949           | 9059.0447  | 5074.5518  | 5241.4881   |
|     | WORST   | 2027.1857        | <b>2020.0701</b> | 2334.9750  | 2117.1110  | 2069.6212   |
| F20 | AVERAGE | 2023.7020        | <b>2008.7991</b> | 2256.1712  | 2042.0310  | 2040.5744   |
|     | BEST    | 2015.0772        | <b>2000.0000</b> | 2184.5983  | 2001.2692  | 2025.0200   |
|     | STD     | <b>3.4358</b>    | 7.2075           | 46.9631    | 27.5174    | 12.3403     |
|     | WORST   | 2027.1857        | <b>2020.0701</b> | 2334.9750  | 2117.1110  | 2069.6212   |

**Table S7.** Experiments on CS, DE, GSA, GWO, HS for F21~F30 functions under D=10 on parameters I

| Problems | Criteria | CS               | DE               | GSA              | GWO              | HS        |
|----------|----------|------------------|------------------|------------------|------------------|-----------|
| F21      | WORST    | <b>2203.3038</b> | 2261.4266        | 2376.0687        | 2326.0860        | 2357.0939 |
|          | AVERAGE  | <b>2202.1734</b> | 2227.5559        | 2351.5527        | 2286.4618        | 2346.3917 |
|          | BEST     | 2200.8895        | <b>2195.8115</b> | 2312.9625        | 2200.7720        | 2328.6834 |
|          | STD      | <b>0.7034</b>    | 16.8024          | 15.4498          | 50.3944          | 7.1709    |
| F22      | WORST    | 2301.5094        | 2312.8103        | <b>2300.0000</b> | 2315.1597        | 2379.6791 |
|          | AVERAGE  | <b>2261.7179</b> | 2274.0882        | 2300.0000        | 2300.4595        | 2337.1244 |
|          | BEST     | 2229.0184        | 2245.2173        | 2300.0000        | <b>2211.4188</b> | 2316.1418 |
|          | STD      | 29.0084          | 20.3614          | <b>0.0000</b>    | 21.2943          | 15.5182   |
| F23      | WORST    | <b>2619.7398</b> | 2620.8530        | 2803.9100        | 2632.6590        | 2657.0341 |
|          | AVERAGE  | 2614.5752        | 2615.6108        | 2716.2573        | 2612.9657        | 2643.1545 |
|          | BEST     | 2610.2301        | 2611.8498        | 2668.6773        | 2606.2089        | 2627.2831 |
|          | STD      | 2.4322           | <b>2.3720</b>    | 35.5893          | 7.8732           | 7.5852    |
| F24      | WORST    | <b>2609.1200</b> | 2748.5300        | 2805.6592        | 2757.0103        | 2796.4827 |
|          | AVERAGE  | <b>2512.0808</b> | 2647.8613        | 2530.5158        | 2740.6903        | 2771.6671 |
|          | BEST     | 2499.7799        | 2533.2837        | 2500.0000        | 2700.0318        | 2695.4249 |
|          | STD      | 23.3365          | 64.0913          | 93.9257          | <b>13.3957</b>   | 20.8507   |
| F25      | WORST    | <b>2897.7450</b> | 2907.2550        | 2943.4587        | 2948.7180        | 3000.2722 |
|          | AVERAGE  | <b>2696.1330</b> | 2902.4491        | 2943.4072        | 2932.1744        | 2966.1288 |
|          | BEST     | <b>2606.5377</b> | 2899.4363        | 2943.3854        | 2898.2724        | 2948.9076 |
|          | STD      | 105.6240         | 1.8283           | <b>0.0160</b>    | 19.3456          | 11.6660   |
| F26      | WORST    | <b>2812.6105</b> | 2970.8473        | 4262.7421        | 3103.8741        | 4482.3144 |
|          | AVERAGE  | <b>2689.5592</b> | 2835.3325        | 3092.9736        | 2909.4141        | 3679.2310 |
|          | BEST     | <b>2602.2976</b> | 2670.2209        | 2800.0000        | 2818.1834        | 3159.9849 |
|          | STD      | 98.6713          | 113.1683         | 555.2468         | <b>51.6281</b>   | 426.7441  |
| F27      | WORST    | 3090.2130        | <b>3081.5671</b> | 3279.4988        | 3103.1621        | 3132.2014 |
|          | AVERAGE  | 3087.9813        | <b>3074.4847</b> | 3229.3362        | 3093.6139        | 3114.4357 |
|          | BEST     | 3085.2634        | <b>3070.8567</b> | 3181.8749        | 3089.3101        | 3104.5276 |

|     |         |                  |                  |             |                  |               |
|-----|---------|------------------|------------------|-------------|------------------|---------------|
|     | STD     | <b>1.7058</b>    | 3.5214           | 23.6340     | 3.3357           | 8.0865        |
| F28 | WORST   | <b>3171.8624</b> | 3279.7599        | 3383.7452   | 3412.7300        | 3635.8306     |
|     | AVERAGE | <b>3122.4297</b> | 3272.9084        | 3376.8636   | 3338.7800        | 3520.0120     |
|     | BEST    | 3100.8481        | 3272.5005        | 3246.1124   | 3165.3218        | 3457.6124     |
|     | STD     | 24.9811          | <b>1.6169</b>    | 30.7756     | 100.6271         | 54.4637       |
| F29 | WORST   | 3185.6997        | <b>3181.5116</b> | 3616.0748   | 3201.3438        | 3467.3319     |
|     | AVERAGE | 3170.3759        | 3168.9722        | 3362.5987   | <b>3165.8671</b> | 3337.3840     |
|     | BEST    | 3152.8914        | 3147.3843        | 3263.0803   | 3143.6933        | 3241.2195     |
|     | STD     | <b>9.6106</b>    | 9.8150           | 79.7743     | 16.3885          | 56.3242       |
| F30 | WORST   | 32230.7770       | <b>5220.7723</b> | 974802.2003 | 1694512.1873     | 10045600.7709 |
|     | AVERAGE | 11249.6413       | <b>3802.5453</b> | 716829.3885 | 419049.9522      | 5753949.0405  |
|     | BEST    | 4118.4237        | <b>3277.9005</b> | 525888.3046 | 6238.0000        | 1657671.8651  |
|     | STD     | 6746.4145        | <b>565.6909</b>  | 110449.8440 | 644144.1293      | 2373732.5875  |

## Supplementary Material C

**Table S8.** Experiments on GA, PSO, ABC, BA, IA, FA for F1~F10 functions under D=50 on parameters I

| Problems | Criteria | GA          | PSO         | ABC              | BA          | IA          | FA          |
|----------|----------|-------------|-------------|------------------|-------------|-------------|-------------|
| F1       | WORST    | 1.15E+10    | 2.08E+11    | 9.85E+07         | 3.92E+10    | 1.15E+11    | 2.08E+11    |
|          | AVERAGE  | 3.52E+09    | 1.76E+11    | 5.15E+07         | 3.17E+10    | 8.84E+10    | 1.94E+11    |
|          | BEST     | 3.42E+07    | 1.37E+11    | 1.97E+07         | 2.48E+10    | 5.96E+10    | 1.80E+11    |
|          | STD      | 3.58E+09    | 1.95E+10    | 2.11E+07         | 4.45E+09    | 1.44E+10    | 9.01E+09    |
| F2       | WORST    | 2630.1836   | 69961.0934  | 464.9266         | 8058.5289   | 63324.2821  | 85104.7163  |
|          | AVERAGE  | 1161.6697   | 43883.6970  | 397.7584         | 6763.8491   | 29067.7442  | 66839.9077  |
|          | BEST     | 459.1505    | 21897.5945  | 316.1495         | 5315.6348   | 11848.0673  | 45189.6344  |
|          | STD      | 637.5184    | 13164.5830  | 45.9682          | 706.2053    | 12430.1128  | 11966.3422  |
| F3       | WORST    | 609697.3150 | 799838.7480 | 250741.7996      | 108442.5425 | 246240.8790 | 245488.8478 |
|          | AVERAGE  | 357225.5227 | 508150.5636 | 222134.8062      | 75484.9226  | 205818.6053 | 224144.6659 |
|          | BEST     | 234725.6472 | 361969.9330 | 169186.7319      | 58058.7077  | 169782.3312 | 194245.3742 |
|          | STD      | 87040.1272  | 106557.3529 | 21723.6882       | 12703.6189  | 19639.0067  | 15684.4441  |
| F4       | WORST    | 1002.0903   | 51317.5811  | 662.3985         | 4063.2995   | 39484.5028  | 74908.6213  |
|          | AVERAGE  | 775.5342    | 38707.2423  | 602.6489         | 2808.5483   | 22510.4298  | 66493.1231  |
|          | BEST     | 696.4286    | 28302.0355  | 538.1760         | 2058.2742   | 13647.6373  | 58783.0090  |
|          | STD      | 65.2127     | 6756.5074   | 35.2840          | 539.3999    | 6259.6480   | 4493.0140   |
| F5       | WORST    | 1063.9642   | 1622.6180   | 803.6027         | 1089.8516   | 1200.5481   | 1471.9552   |
|          | AVERAGE  | 1026.2105   | 1473.4018   | 758.4043         | 1017.9668   | 1110.7023   | 1418.9024   |
|          | BEST     | 970.8414    | 1389.3065   | 696.8648         | 945.0356    | 1028.0266   | 1366.2310   |
|          | STD      | 27.0791     | 63.6173     | 30.5942          | 33.7224     | 50.6584     | 26.6224     |
| F6       | WORST    | 694.8013    | 729.6394    | 606.2486         | 671.7973    | 699.0175    | 713.4890    |
|          | AVERAGE  | 687.1545    | 719.3547    | 603.3754         | 660.9922    | 682.4878    | 709.2457    |
|          | BEST     | 672.5448    | 708.6088    | 601.9090         | 651.1449    | 666.1774    | 705.2882    |
|          | STD      | 5.7621      | 5.5090      | 0.9356           | 5.5076      | 9.3277      | 2.2881      |
| F7       | WORST    | 2109.2363   | 5674.2438   | 1165.5137        | 2307.1567   | 1986.1061   | 5083.9418   |
|          | AVERAGE  | 1702.9699   | 5167.3011   | 1121.3564        | 2078.7286   | 1845.2772   | 4873.8013   |
|          | BEST     | 1465.2054   | 4612.6251   | 1073.4776        | 1871.3300   | 1680.0030   | 4620.9629   |
|          | STD      | 167.5442    | 295.0843    | 27.3060          | 120.7691    | 108.2505    | 133.0190    |
| F8       | WORST    | 1394.2189   | 1836.2366   | 1095.0179        | 1389.8781   | 1482.1620   | 1792.4511   |
|          | AVERAGE  | 1358.8562   | 1750.9428   | 1056.6822        | 1320.0725   | 1409.1977   | 1736.9555   |
|          | BEST     | 1311.2458   | 1673.1201   | 987.1964         | 1260.6791   | 1342.7254   | 1676.6093   |
|          | STD      | 21.2832     | 37.0708     | 24.7954          | 31.0063     | 45.6248     | 30.5943     |
| F9       | WORST    | 4198.1251   | 89578.5696  | 15433.5095       | 22609.0023  | 28679.2716  | 48036.4934  |
|          | AVERAGE  | 2263.8017   | 64449.2711  | 12443.5396       | 15375.9241  | 21498.9031  | 43611.5834  |
|          | BEST     | 1418.8323   | 45440.9967  | 7813.3345        | 9810.5055   | 15828.9594  | 37786.2325  |
|          | STD      | 714.7284    | 12111.9492  | 2069.6197        | 3470.8475   | 2795.7986   | 2659.6917   |
| F10      | WORST    | 13570.9779  | 14917.3483  | <b>7191.2271</b> | 14884.4136  | 14057.3827  | 14503.4267  |

|         |            |            |           |            |            |            |
|---------|------------|------------|-----------|------------|------------|------------|
| AVERAGE | 12782.0875 | 13871.3832 | 6520.9602 | 14174.2205 | 12425.7911 | 14088.4691 |
| BEST    | 12115.1652 | 12541.6909 | 5860.4629 | 13037.5499 | 11479.6629 | 13436.4445 |
| STD     | 298.8837   | 667.8415   | 416.3968  | 469.4655   | 640.7047   | 261.0130   |

**Table S9.** Experiments on GA, PSO, ABC, BA, IA, FA for F11~F20 functions under D=50 on parameters I

| Problems | Criteria | GA           | PSO           | ABC             | BA         | IA         | FA         |
|----------|----------|--------------|---------------|-----------------|------------|------------|------------|
| F11      | WORST    | 30555.7454   | 64998.8020    | 8604.2089       | 7915.2986  | 49745.9818 | 30616.8427 |
|          | AVERAGE  | 16531.7296   | 39171.6324    | 4445.6691       | 4868.5839  | 26390.0845 | 25779.5944 |
|          | BEST     | 3724.2206    | 24986.5905    | 2092.9880       | 3137.3655  | 13836.8520 | 19294.1337 |
|          | STD      | 8959.7814    | 11329.5137    | 1438.4441       | 934.9020   | 8970.0158  | 3183.3412  |
| F12      | WORST    | 9.2287E+07   | 5.7842E+10    | 5.0862E+07      | 1.0098E+10 | 8.3043E+10 | 1.0466E+11 |
|          | AVERAGE  | 3.1509E+07   | 4.3772E+10    | 2.9903E+07      | 7.2143E+09 | 4.8610E+10 | 8.7802E+10 |
|          | BEST     | 9.6178E+06   | 2.7776E+10    | 1.0845E+07      | 5.4806E+09 | 2.0730E+10 | 6.3454E+10 |
|          | STD      | 1.9823E+07   | 8.6710E+09    | 9.9170E+06      | 1.0827E+09 | 1.5241E+10 | 1.2636E+10 |
| F13      | WORST    | 1.75E+09     | 3.20E+10      | 3.11E+06        | 3.34E+09   | 5.17E+10   | 5.70E+10   |
|          | AVERAGE  | 1.47E+08     | 1.70E+10      | 1.36E+06        | 2.55E+09   | 3.82E+10   | 4.44E+10   |
|          | BEST     | 4.14E+05     | 9.57E+09      | 4.39E+05        | 1.76E+09   | 2.42E+10   | 3.76E+10   |
|          | STD      | 3.87E+08     | 6.10E+09      | 7.65E+05        | 4.67E+08   | 8.70E+09   | 4.61E+09   |
| F14      | WORST    | 1.5059E+07   | 71876978.2999 | 2619197.4530    | 1.4593E+06 | 1.8785E+08 | 4.9672E+07 |
|          | AVERAGE  | 6.6103E+06   | 15610935.4537 | 1338328.7670    | 9.0724E+05 | 9.6261E+07 | 2.1686E+07 |
|          | BEST     | 376611.6645  | 2219745.6821  | 226652.2209     | 2.1855E+05 | 1.8342E+07 | 1.0127E+07 |
|          | STD      | 4158711.1390 | 18766590.3343 | 656097.7723     | 3.7442E+05 | 4.6425E+07 | 1.1179E+07 |
| F15      | WORST    | 3.1154E+06   | 8.0360E+09    | 1236234.6520    | 1.12E+09   | 2.34E+10   | 1.39E+10   |
|          | AVERAGE  | 361118.5569  | 3.1240E+09    | 462588.7692     | 6.61E+08   | 1.14E+10   | 1.06E+10   |
|          | BEST     | 50573.2293   | 1.4585E+09    | 126579.0185     | 3.69E+08   | 4.30E+09   | 5.84E+09   |
|          | STD      | 676071.4986  | 1.5514E+09    | 305981.6276     | 2.05E+08   | 4.42E+09   | 2.11E+09   |
| F16      | WORST    | 4299.1178    | 7803.5421     | 3703.8239       | 5670.2176  | 9784.8314  | 10268.0612 |
|          | AVERAGE  | 3612.1744    | 6880.5069     | 3163.5538       | 5004.0648  | 7117.5242  | 8969.9441  |
|          | BEST     | 2764.0783    | 5953.3293     | 2519.2269       | 4572.8909  | 5511.4685  | 8191.5127  |
|          | STD      | 460.4562     | 483.5784      | 300.1742        | 268.0510   | 1159.3968  | 457.4493   |
| F17      | WORST    | 4024.5958    | 69840.7626    | 3288.2235       | 5239.7147  | 62012.3783 | 50695.4259 |
|          | AVERAGE  | 3222.7260    | 22901.7614    | 3060.1157       | 4727.5824  | 22830.2196 | 22031.0043 |
|          | BEST     | 2300.5602    | 7342.7078     | 2894.5219       | 3669.8606  | 4626.5963  | 9208.5561  |
|          | STD      | 393.5359     | 17711.6096    | <b>126.0397</b> | 379.7353   | 20108.3042 | 9926.7546  |
| F18      | WORST    | 3.17E+07     | 2.26E+08      | 5.15E+06        | 2.03E+07   | 4.70E+08   | 1.27E+08   |
|          | AVERAGE  | 1.17E+07     | 6.57E+07      | 2.69E+06        | 1.03E+07   | 1.73E+08   | 7.47E+07   |
|          | BEST     | 982358.2504  | 19911167.0994 | 778339.2615     | 3.1092E+06 | 4.4159E+07 | 4.6064E+07 |
|          | STD      | 8466361.7220 | 56270437.5344 | 1228021.7460    | 4.5061E+06 | 1.0824E+08 | 2.0690E+07 |
| F19      | WORST    | 9118373.4420 | 4.5185E+09    | 349055.2451     | 4.7982E+08 | 9.9806E+09 | 7.0271E+09 |
|          | AVERAGE  | 953475.4028  | 2.3000E+09    | 203305.0359     | 3.2058E+08 | 5.6239E+09 | 4.7235E+09 |
|          | BEST     | 15605.7538   | 8.5125E+08    | 24411.1902      | 1.9140E+08 | 1.2132E+09 | 2.1683E+09 |

|     |         |              |            |            |            |            |                |
|-----|---------|--------------|------------|------------|------------|------------|----------------|
|     | STD     | 2047383.6790 | 1.0206E+09 | 85894.8537 | 8.0856E+07 | 2.6401E+09 | 1.1424E+09     |
| F20 | WORST   | 3819.7110    | 4588.0392  | 3229.1906  | 4202.7592  | 4935.8382  | 4023.1671      |
|     | AVERAGE | 3497.9397    | 4208.1546  | 2936.9495  | 3754.9202  | 4460.3035  | 3846.2905      |
|     | BEST    | 3107.4390    | 3695.5248  | 2405.5544  | 3456.3644  | 4079.2094  | 3640.2597      |
|     | STD     | 186.8896     | 228.3120   | 210.0079   | 196.0929   | 251.6456   | <b>89.8943</b> |

**Table S10.** Experiments on GA, PSO, ABC, BA, IA, FA for F21~F30 functions under D=50 on parameters I

| Problems | Criteria | GA         | PSO        | ABC              | BA         | IA          | FA         |
|----------|----------|------------|------------|------------------|------------|-------------|------------|
| F21      | WORST    | 2970.6277  | 3315.7557  | 2617.0560        | 2881.1266  | 3048.3489   | 3333.6841  |
|          | AVERAGE  | 2930.5201  | 3203.1208  | 2576.8571        | 2804.1044  | 2934.8968   | 3268.1014  |
|          | BEST     | 2881.8476  | 3120.6501  | 2529.0108        | 2735.2119  | 2809.2467   | 3192.4711  |
|          | STD      | 25.2088    | 48.5644    | 22.6817          | 40.6593    | 72.8183     | 37.7581    |
| F22      | WORST    | 15305.0861 | 16719.2738 | <b>9076.1567</b> | 16488.0774 | 15871.1124  | 16210.1051 |
|          | AVERAGE  | 14492.9772 | 15250.2298 | 8224.8142        | 15768.3599 | 14611.6729  | 15802.1631 |
|          | BEST     | 13619.4550 | 14423.4310 | 7065.6044        | 15034.4223 | 13196.1348  | 15127.3306 |
|          | STD      | 508.1153   | 723.0329   | 513.7224         | 426.0571   | 856.9585    | 287.6048   |
| F23      | WORST    | 3552.3511  | 4105.9972  | 3109.4953        | 3298.0218  | 4236.3205   | 4738.7292  |
|          | AVERAGE  | 3441.2808  | 3878.0850  | 3046.1689        | 3249.6314  | 3999.1496   | 4588.3645  |
|          | BEST     | 3372.7435  | 3715.9012  | 2981.1774        | 3183.1404  | 3612.9215   | 4359.3143  |
|          | STD      | 48.8230    | 116.3666   | 37.2542          | 26.4210    | 148.1612    | 102.5072   |
| F24      | WORST    | 3661.9653  | 4152.6961  | 3754.7899        | 3420.3124  | 4568.1748   | 5349.8123  |
|          | AVERAGE  | 3584.4356  | 3875.3554  | 3584.9933        | 3366.9236  | 4377.3174   | 5114.4496  |
|          | BEST     | 3522.9748  | 3676.1691  | 3479.8466        | 3310.8416  | 4125.6367   | 4884.6487  |
|          | STD      | 36.8707    | 138.2199   | 83.4934          | 32.6894    | 136.0074    | 115.9334   |
| F25      | WORST    | 3867.0355  | 50591.5888 | 3161.0573        | 5616.2640  | 16298.5236  | 41122.3945 |
|          | AVERAGE  | 3614.5671  | 35970.5457 | 3105.3323        | 4981.1325  | 12688.8251  | 36992.1953 |
|          | BEST     | 3493.4358  | 27898.5677 | 3034.0900        | 4277.0781  | 9306.2472   | 33835.8363 |
|          | STD      | 95.1332    | 5904.3163  | 26.6389          | 413.6734   | 2199.8857   | 2302.1746  |
| F26      | WORST    | 9595.9930  | 18727.2635 | 8132.0977        | 9764.4633  | 18135.1015  | 26209.6781 |
|          | AVERAGE  | 8994.8341  | 15928.4327 | 6850.0863        | 9168.1036  | 15115.5720  | 24034.7683 |
|          | BEST     | 8225.2988  | 13236.0103 | 3656.6354        | 8566.3686  | 12935.5421  | 22771.8498 |
|          | STD      | 352.8107   | 1464.1351  | 1060.2870        | 303.4838   | 1234.8064   | 911.6484   |
| F27      | WORST    | 3992.1781  | 4873.5988  | 3510.0864        | 3781.2338  | 6760.6593   | 7183.7432  |
|          | AVERAGE  | 3866.3328  | 4341.3224  | 3449.4407        | 3559.4422  | 5993.8858   | 6766.6958  |
|          | BEST     | 3728.8231  | 3692.5226  | 3379.0995        | 3426.8292  | 4898.6529   | 6391.5922  |
|          | STD      | 69.7153    | 293.6257   | 35.4134          | 91.9191    | 463.7360    | 271.5025   |
| F28      | WORST    | 4248.7610  | 16137.4790 | 3431.1360        | 4805.7488  | 12623.4491  | 19664.9048 |
|          | AVERAGE  | 3937.8973  | 12357.2644 | 3370.0006        | 4355.3049  | 10450.1143  | 18183.0075 |
|          | BEST     | 3781.9206  | 10197.2315 | 3293.5375        | 3946.3806  | 7977.4782   | 16089.8735 |
|          | STD      | 116.7470   | 1377.6597  | 33.1999          | 206.0410   | 1187.3975   | 998.2653   |
| F29      | WORST    | 4646.1388  | 14468.9624 | 4391.6559        | 7506.6945  | 116650.0367 | 86074.0103 |

|     |         |            |            |            |            |            |            |
|-----|---------|------------|------------|------------|------------|------------|------------|
|     | AVERAGE | 4228.6134  | 9699.7186  | 4138.6346  | 6162.0245  | 33665.1837 | 41271.2405 |
|     | BEST    | 3726.4604  | 7888.3082  | 3764.1914  | 5473.4611  | 7414.0877  | 18967.3676 |
|     | STD     | 249.3349   | 1734.3438  | 176.4197   | 468.4095   | 32574.8600 | 16068.8959 |
| F30 | WORST   | 4.3314E+06 | 5.6656E+09 | 2.6934E+06 | 9.2608E+08 | 1.2794E+10 | 1.0684E+10 |
|     | AVERAGE | 2.8795E+06 | 2.8491E+09 | 1.6924E+06 | 6.4065E+08 | 6.5933E+09 | 7.5141E+09 |
|     | BEST    | 1.5853E+06 | 8.3692E+08 | 1.2138E+06 | 4.0143E+08 | 2.2890E+09 | 5.3812E+09 |
|     | STD     | 7.0052E+05 | 1.3093E+09 | 4.3336E+05 | 1.3589E+08 | 2.9616E+09 | 1.1008E+09 |

**Table S11.** Experiments on CS, DE, GSA, GWO, HS for F1~F10 functions under D=50 on parameters I

| Problems | Criteria | CS                 | DE               | GSA                | GWO             | HS              |
|----------|----------|--------------------|------------------|--------------------|-----------------|-----------------|
| F1       | WORST    | 5019.399577        | 13731.59286      | <b>4854.004153</b> | 9103167715      | 23808787.37     |
|          | AVERAGE  | <b>1143.542341</b> | 5593.337216      | 1270.585353        | 4817920639      | 18706543.28     |
|          | BEST     | 123.9051449        | 873.0697854      | <b>100.0351925</b> | 734891372.1     | 13686192.93     |
|          | STD      | 1549.220759        | 4263.593933      | <b>1259.974096</b> | 2377275277      | 2756487.371     |
| F2       | WORST    | 200.0025           | 2508.3802        | <b>200.0005</b>    | 1974.7793       | 1490.2158       |
|          | AVERAGE  | 200.0022           | 1584.0207        | <b>200.0003</b>    | 1416.5266       | 962.9948        |
|          | BEST     | 200.0016           | 655.5803         | <b>200.0003</b>    | 847.1604        | 718.3262        |
|          | STD      | 0.0002             | 575.4537         | <b>0.0001</b>      | 322.0299        | 194.4486        |
| F3       | WORST    | <b>35513.8408</b>  | 290220.4289      | 162794.3989        | 88725.7864      | 380802.8375     |
|          | AVERAGE  | <b>30556.6259</b>  | 178300.0851      | 142423.1048        | 63191.6997      | 309668.4963     |
|          | BEST     | <b>23335.6498</b>  | 75728.0424       | 122650.8243        | 39661.3200      | 201802.6338     |
|          | STD      | <b>3231.9410</b>   | 67623.5131       | 10617.1037         | 15954.5958      | 44134.9967      |
| F4       | WORST    | 499.7741           | <b>448.6336</b>  | 595.6381           | 1246.8938       | 666.2820        |
|          | AVERAGE  | <b>444.2842</b>    | 445.9746         | 518.1847           | 827.0265        | 615.0293        |
|          | BEST     | <b>426.3077</b>    | 444.4458         | 428.5127           | 624.7922        | 540.5747        |
|          | STD      | 21.9202            | <b>0.8845</b>    | 41.4049            | 149.9551        | 34.4209         |
| F5       | WORST    | 818.4900           | 728.7132         | 850.2229           | <b>709.6835</b> | 843.7751        |
|          | AVERAGE  | 783.4911           | 698.0146         | 823.2600           | <b>667.5045</b> | 676.2427        |
|          | BEST     | 732.6594           | 665.6601         | 782.5667           | 639.3635        | <b>568.5427</b> |
|          | STD      | 26.2829            | 18.8940          | <b>17.2749</b>     | 18.9106         | 87.3930         |
| F6       | WORST    | 659.1498           | <b>600.0000</b>  | 658.4497           | 613.6512        | 606.8287        |
|          | AVERAGE  | 648.3113           | <b>600.0000</b>  | 650.1581           | 608.3309        | 603.2226        |
|          | BEST     | 638.3152           | <b>600.0000</b>  | 640.8974           | 601.9816        | 601.6936        |
|          | STD      | 6.2088             | <b>0.0000</b>    | 4.1785             | 3.4111          | 1.3148          |
| F7       | WORST    | 1101.5316          | 997.8648         | <b>818.1593</b>    | 1044.0531       | 1215.2829       |
|          | AVERAGE  | 1020.4381          | 957.6188         | <b>789.1432</b>    | 974.5407        | 1151.5824       |
|          | BEST     | 965.2413           | 912.7168         | <b>773.3115</b>    | 896.6980        | 1030.0316       |
|          | STD      | 33.0585            | 26.1531          | <b>10.5079</b>     | 37.3839         | 47.8639         |
| F8       | WORST    | 1150.8748          | <b>1037.1801</b> | 1166.1422          | 1070.0558       | 1149.3401       |
|          | AVERAGE  | 1093.3177          | 1003.5322        | 1142.9600          | 982.3760        | <b>924.7647</b> |
|          | BEST     | 1022.4460          | 970.9222         | 1108.4355          | 935.6918        | <b>853.3344</b> |

|     |         |                 |                  |                |                  |                  |
|-----|---------|-----------------|------------------|----------------|------------------|------------------|
|     | STD     | 34.1885         | 21.5236          | <b>14.7506</b> | 36.7209          | 92.0858          |
| F9  | WORST   | 19961.1751      | 3471.7104        | 5865.2357      | 10667.5938       | <b>2479.0426</b> |
|     | AVERAGE | 14059.4314      | <b>1355.8390</b> | 4586.3377      | 4471.2094        | 1853.9088        |
|     | BEST    | 8095.2709       | <b>900.5945</b>  | 3599.1595      | 2036.0158        | 1195.2417        |
|     | STD     | 2848.1163       | 747.5491         | 651.7507       | 2256.7808        | <b>400.7461</b>  |
| F10 | WORST   | 7362.4138       | 10180.8247       | 8830.5155      | 7724.5665        | 15625.4748       |
|     | AVERAGE | 7066.1550       | 9185.2654        | 7390.7770      | <b>6240.9936</b> | 14945.2187       |
|     | BEST    | 6451.3279       | 8480.0201        | 6523.2579      | <b>5185.1252</b> | 13911.7385       |
|     | STD     | <b>231.3603</b> | 528.1585         | 636.6554       | 587.3618         | 445.8150         |

**Table S12.** Experiments on CS, DE, GSA, GWO, HS for F11~F20 functions under D=50 on parameters I

| Problems | Criteria | CS                 | DE               | GSA                | GWO              | HS            |
|----------|----------|--------------------|------------------|--------------------|------------------|---------------|
| F11      | WORST    | 1256.4925          | 1272.7944        | <b>1247.6112</b>   | 8485.4120        | 12658.3415    |
|          | AVERAGE  | 1230.7902          | <b>1205.2123</b> | 1222.0223          | 2995.4541        | 6215.3391     |
|          | BEST     | 1203.4215          | <b>1136.1366</b> | 1204.7225          | 1433.0228        | 1822.6576     |
|          | STD      | 14.5527            | 39.9526          | <b>10.7532</b>     | 1582.2245        | 2886.5663     |
| F12      | WORST    | <b>1127842.779</b> | 56685862.78      | 1414442.107        | 1520752626       | 78183311.88   |
|          | AVERAGE  | <b>672424.9686</b> | 26437089.96      | 855635.6488        | 294383191.8      | 34678421.88   |
|          | BEST     | <b>268554.0601</b> | 3947914.103      | 515720.5835        | 19049338.32      | 12786992.11   |
|          | STD      | 250428.9051        | 16784841.01      | <b>226006.1909</b> | 343565070.4      | 17752669.1    |
| F13      | WORST    | 24397.1999         | 67743.5178       | <b>22133.4028</b>  | 733701771.6000   | 1142862.6210  |
|          | AVERAGE  | <b>9677.9830</b>   | 21203.3802       | 17921.5443         | 135021417.8000   | 843206.5263   |
|          | BEST     | <b>2751.1694</b>   | 5790.7626        | 14967.2879         | 63486.6078       | 495415.3774   |
|          | STD      | 7467.5832          | 15943.7785       | <b>2381.7263</b>   | 178988003.7000   | 142481.4624   |
| F14      | WORST    | <b>2267.2151</b>   | 1247809.8400     | 40013.0854         | 434759.3290      | 9665447.8550  |
|          | AVERAGE  | <b>1881.0893</b>   | 530715.5570      | 19784.9556         | 192108.3809      | 2009212.9630  |
|          | BEST     | <b>1706.0756</b>   | 170167.4699      | 11095.5617         | 30739.6042       | 124466.1859   |
|          | STD      | <b>186.0523</b>    | 305928.9918      | 7266.2912          | 138234.8893      | 2176854.9560  |
| F15      | WORST    | <b>5091.7634</b>   | 39102.5097       | 17321.9858         | 26990171.9500    | 204336.5002   |
|          | AVERAGE  | <b>2705.2721</b>   | 15957.5762       | 12211.5594         | 4645056.2300     | 147926.1275   |
|          | BEST     | <b>1974.0867</b>   | 3264.2095        | 7022.9687          | 14284.0550       | 104990.3422   |
|          | STD      | <b>810.2771</b>    | 10769.5596       | 3477.9936          | 8683460.8300     | 28453.8141    |
| F16      | WORST    | 3405.8413          | <b>3279.4340</b> | 3968.4809          | 3299.0517        | 5269.1610     |
|          | AVERAGE  | 3187.8035          | 2836.6620        | 3520.8892          | <b>2836.3719</b> | 4844.4939     |
|          | BEST     | 2901.2676          | 2282.5166        | 2757.7385          | <b>2224.9640</b> | 4152.4415     |
|          | STD      | <b>127.0180</b>    | 251.4863         | 325.1560           | 256.7214         | 322.6061      |
| F17      | WORST    | 3003.2775          | 2950.8677        | 4139.0874          | <b>2845.3096</b> | 4111.8163     |
|          | AVERAGE  | 2810.0084          | 2665.4146        | 3560.2046          | <b>2620.4479</b> | 3731.8330     |
|          | BEST     | 2481.8839          | 2216.1170        | 3086.3096          | <b>2163.6668</b> | 2433.7206     |
|          | STD      | 156.5652           | 226.9739         | 336.6568           | 167.8344         | 372.7768      |
| F18      | WORST    | <b>197978.0572</b> | 2384173.6590     | 307262.3202        | 17332150.1300    | 37760674.7100 |

|     |         |                    |                  |             |              |               |
|-----|---------|--------------------|------------------|-------------|--------------|---------------|
| F19 | AVERAGE | <b>141364.6498</b> | 1339528.7440     | 184493.7265 | 2186183.3760 | 18235029.4200 |
|     | BEST    | <b>72474.5628</b>  | 304312.7360      | 90318.6027  | 138681.5682  | 2608617.7540  |
|     | STD     | <b>33577.2560</b>  | 495027.4796      | 48953.1106  | 3668607.2520 | 9763840.4850  |
|     | WORST   | <b>3623.8097</b>   | 10516.3237       | 21947.8249  | 8727111.4300 | 111708.3029   |
| F20 | AVERAGE | <b>2350.7099</b>   | 7571.8018        | 16936.0272  | 1598319.6350 | 77858.6376    |
|     | BEST    | <b>2023.5797</b>   | 4768.4602        | 11366.8130  | 39042.6818   | 44938.6624    |
|     | STD     | <b>338.6595</b>    | 1725.2511        | 2597.7610   | 2939551.3510 | 21048.5868    |
|     | WORST   | 3169.7028          | <b>2683.3248</b> | 4161.9016   | 3159.7169    | 4355.9163     |
| F21 | AVERAGE | 2898.5694          | <b>2489.0004</b> | 3440.7617   | 2680.4872    | 4003.3221     |
|     | BEST    | 2663.3383          | <b>2239.3789</b> | 2901.2167   | 2374.2686    | 3665.8884     |
|     | STD     | 119.2373           | 125.3900         | 269.0799    | 218.9314     | 194.0833      |
|     | WORST   | 3169.7028          | <b>2683.3248</b> | 4161.9016   | 3159.7169    | 4355.9163     |

**Table S13.** Experiments on CS, DE, GSA, GWO, HS for F21~F30 functions under D=50 on parameters I

| Problems | Criteria | CS               | DE               | GSA              | GWO              | HS               |
|----------|----------|------------------|------------------|------------------|------------------|------------------|
| F21      | WORST    | 2607.3249        | 2552.7589        | 2753.4699        | <b>2523.8537</b> | 2659.1014        |
|          | AVERAGE  | 2564.2783        | 2518.3894        | 2687.7899        | <b>2474.0013</b> | 2573.9167        |
|          | BEST     | 2488.7192        | 2475.4391        | 2636.8722        | 2429.5137        | <b>2377.2626</b> |
|          | STD      | 33.0401          | <b>18.7318</b>   | 30.9734          | 24.5615          | 91.1159          |
| F22      | WORST    | 9531.8957        | 11853.9031       | 12021.2434       | 9343.8251        | 17079.8188       |
|          | AVERAGE  | 8959.7994        | 10755.4056       | 11149.4412       | <b>8202.8470</b> | 16338.8772       |
|          | BEST     | 8615.8542        | <b>4469.1726</b> | 10079.7740       | 6677.0551        | 15277.4374       |
|          | STD      | <b>230.6388</b>  | 1550.2496        | 502.0526         | 650.6074         | 503.1918         |
| F23      | WORST    | 3039.4170        | 2932.6102        | 4342.1717        | 2964.0557        | <b>2872.1435</b> |
|          | AVERAGE  | 2993.5997        | 2901.9881        | 4021.9049        | 2909.0850        | <b>2834.1074</b> |
|          | BEST     | 2946.5063        | 2867.9786        | 3824.8555        | 2834.0203        | <b>2802.8153</b> |
|          | STD      | 24.0437          | 20.1130          | 129.7924         | 32.8177          | <b>18.1618</b>   |
| F24      | WORST    | <b>3194.6120</b> | 3330.8977        | 3619.6175        | 3348.0622        | 3317.8242        |
|          | AVERAGE  | 3148.4686        | 3280.7747        | 3538.5860        | <b>3076.6011</b> | 3279.4091        |
|          | BEST     | 3104.4223        | 3209.2159        | 3438.1686        | <b>2999.1116</b> | 3251.3010        |
|          | STD      | 23.4474          | 37.3563          | 55.5011          | 83.0537          | <b>18.1563</b>   |
| F25      | WORST    | 3019.9450        | <b>2931.2757</b> | 3082.2015        | 3681.1651        | 3246.5385        |
|          | AVERAGE  | 2975.1062        | <b>2931.2167</b> | 3053.8875        | 3333.2251        | 3105.9637        |
|          | BEST     | 2944.2583        | <b>2931.1563</b> | 2963.1917        | 3146.3438        | 3025.4649        |
|          | STD      | 21.8790          | <b>0.0367</b>    | 30.6097          | 157.8912         | 52.0988          |
| F26      | WORST    | 7183.1980        | 5683.9697        | <b>2900.0000</b> | 6437.7451        | 5064.7051        |
|          | AVERAGE  | 4852.8814        | 5333.7167        | <b>2900.0000</b> | 5827.0137        | 4725.6591        |
|          | BEST     | 2944.6718        | 4832.6575        | <b>2900.0000</b> | 5221.1038        | 4335.6432        |
|          | STD      | 1590.5749        | 189.8246         | <b>0.0000</b>    | 353.1515         | 216.0491         |
| F27      | WORST    | 3353.0500        | <b>3200.0113</b> | 6201.6513        | 3693.4801        | 3552.2291        |
|          | AVERAGE  | 3286.1705        | <b>3200.0110</b> | 5373.0709        | 3474.6478        | 3455.4650        |
|          | BEST     | 3228.8344        | <b>3200.0103</b> | 4858.8926        | 3401.4624        | 3350.1761        |



|     |         |                  |                    |             |             |                  |
|-----|---------|------------------|--------------------|-------------|-------------|------------------|
|     | STD     | 37.5202          | <b>0.0002</b>      | 341.5696    | 70.2619     | 55.5717          |
| F28 | WORST   | 3306.2232        | <b>3300.0112</b>   | 3314.4492   | 4607.8553   | 3902.6068        |
|     | AVERAGE | <b>3290.8306</b> | 3300.0109          | 3296.8133   | 3946.3150   | 3628.0022        |
|     | BEST    | <b>3257.6231</b> | 3300.0102          | 3258.8487   | 3552.7303   | 3441.0911        |
|     | STD     | 19.6976          | <b>0.0003</b>      | 14.3911     | 278.4031    | 128.2537         |
| F29 | WORST   | <b>4265.7617</b> | 4347.5235          | 5337.9879   | 4839.9663   | 5217.3585        |
|     | AVERAGE | 4130.9539        | <b>3975.4678</b>   | 4999.5290   | 4114.5251   | 4062.9886        |
|     | BEST    | 3913.9026        | 3521.0306          | 4501.8473   | 3638.7828   | <b>3412.1197</b> |
|     | STD     | <b>82.0980</b>   | 252.3177           | 231.9748    | 310.6121    | 494.5997         |
| F30 | WORST   | 1534536.792      | <b>322381.2344</b> | 7797051.886 | 160152601.7 | 5084118.02       |
|     | AVERAGE | 1083491.397      | <b>131633.1067</b> | 7059991.648 | 71443359.38 | 4007927.406      |
|     | BEST    | 777974.562       | <b>22415.03922</b> | 6458705.602 | 33194299.81 | 2598702.666      |
|     | STD     | 193673.2045      | <b>99353.50603</b> | 401906.7482 | 35611073.29 | 601402.3194      |

## Supplementary Material D

**Table S14** Experiments on GA, PSO, ABC, BA, IA, FA for F1~F10 functions under D=10 on parameters II

| Problems | Criteria | GA         | PSO      | ABC        | BA         | IA         | FA         |
|----------|----------|------------|----------|------------|------------|------------|------------|
| F1       | WORST    | 1.72E+07   | 2.51E+07 | 1.32E+07   | 2.51E+09   | 2.03E+10   | 3.17E+10   |
|          | AVERAGE  | 2.20E+06   | 1.86E+07 | 4.79E+06   | 1.54E+09   | 1.07E+10   | 2.13E+10   |
|          | BEST     | 2.35E+05   | 1.06E+07 | 2.85E+05   | 7.12E+08   | 2.69E+09   | 1.09E+10   |
|          | STD      | 3.66E+06   | 4.18E+06 | 3.61E+06   | 4.98E+08   | 4.59E+09   | 6.80E+09   |
| F2       | WORST    | 620.2018   | 226.4656 | 421.7721   | 807.3159   | 20782.7356 | 19100.2957 |
|          | AVERAGE  | 379.0324   | 211.3775 | 269.5622   | 603.4011   | 6858.7792  | 10274.3262 |
|          | BEST     | 230.5703   | 207.8677 | 208.7685   | 453.2679   | 896.1372   | 2310.0012  |
|          | STD      | 90.2186    | 4.1414   | 52.0523    | 93.5562    | 5852.3112  | 4784.4153  |
| F3       | WORST    | 48950.2657 | 377.7648 | 19999.3084 | 10485.1563 | 77441.3250 | 28324.6109 |
|          | AVERAGE  | 22618.0631 | 351.7427 | 13020.6670 | 6343.2395  | 31143.9367 | 22680.7002 |
|          | BEST     | 3783.3361  | 323.8057 | 6944.5646  | 2951.2262  | 11349.9426 | 15104.7188 |
|          | STD      | 12663.0918 | 13.4729  | 4003.8649  | 2097.3069  | 19258.7633 | 4188.4753  |
| F4       | WORST    | 482.7545   | 476.8150 | 470.3901   | 524.0823   | 2706.6217  | 4980.6238  |
|          | AVERAGE  | 444.2229   | 411.2743 | 412.2447   | 471.1171   | 1472.4049  | 2505.9436  |
|          | BEST     | 412.6303   | 402.5273 | 404.8995   | 439.2745   | 651.9300   | 985.3608   |
|          | STD      | 25.8376    | 15.6313  | 14.5081    | 23.1885    | 668.3813   | 1131.5514  |
| F5       | WORST    | 594.5037   | 552.1705 | 528.2840   | 554.7245   | 637.4059   | 642.5146   |
|          | AVERAGE  | 557.7127   | 536.9861 | 520.3040   | 547.9885   | 594.1289   | 623.1782   |
|          | BEST     | 541.5183   | 524.4867 | 512.0314   | 541.9937   | 557.1627   | 596.5947   |
|          | STD      | 12.6698    | 7.2295   | 5.2089     | 3.2715     | 19.0117    | 11.7623    |
| F6       | WORST    | 645.5053   | 610.9161 | 605.0235   | 650.8179   | 690.5463   | 673.8541   |
|          | AVERAGE  | 635.7167   | 605.9595 | 601.7512   | 629.0364   | 659.8818   | 663.5163   |
|          | BEST     | 620.9014   | 602.1307 | 600.4847   | 617.1400   | 643.0054   | 656.3987   |
|          | STD      | 7.0730     | 2.3343   | 1.0173     | 7.8629     | 13.9250    | 4.8998     |

|     |         |           |           |           |           |           |           |
|-----|---------|-----------|-----------|-----------|-----------|-----------|-----------|
| F7  | WORST   | 912.8540  | 745.6081  | 759.4342  | 869.4248  | 862.9237  | 1191.4556 |
|     | AVERAGE | 824.4512  | 739.0163  | 741.8699  | 833.1616  | 842.7123  | 1094.9558 |
|     | BEST    | 786.8627  | 732.9580  | 729.7402  | 777.4377  | 796.9956  | 995.0074  |
|     | STD     | 36.4897   | 3.8605    | 8.4918    | 23.0459   | 20.5600   | 58.6935   |
| F8  | WORST   | 907.0640  | 842.3781  | 832.6795  | 867.0500  | 920.4991  | 909.1908  |
|     | AVERAGE | 865.3575  | 827.8161  | 820.9819  | 855.7420  | 892.9714  | 897.0352  |
|     | BEST    | 842.4390  | 818.0895  | 808.4897  | 844.0228  | 872.4565  | 872.5030  |
|     | STD     | 14.4199   | 6.9651    | 5.8501    | 5.5397    | 14.4812   | 8.9287    |
| F9  | WORST   | 1750.5047 | 908.7855  | 1262.3747 | 1626.0206 | 4128.6948 | 2783.0071 |
|     | AVERAGE | 1117.8526 | 905.5558  | 977.8729  | 1428.8061 | 2321.4507 | 2367.9278 |
|     | BEST    | 916.5277  | 902.7885  | 901.4372  | 1101.8554 | 1367.3227 | 1982.6069 |
|     | STD     | 252.5027  | 1.4775    | 84.4555   | 138.3544  | 684.1111  | 243.7720  |
| F10 | WORST   | 2418.5017 | 2218.3085 | 1930.2247 | 2854.2843 | 3650.5490 | 2737.0893 |
|     | AVERAGE | 2063.8674 | 1954.0078 | 1603.3122 | 2325.8570 | 3105.3384 | 2568.1092 |
|     | BEST    | 1714.9456 | 1573.5261 | 1132.9149 | 1730.0210 | 2678.1069 | 2343.8011 |
|     | STD     | 202.0139  | 200.2997  | 216.0494  | 268.8732  | 265.8077  | 116.3733  |

**Table S15.** Experiments on GA, PSO, ABC, BA, IA, FA for F11~F20 functions under D=10 on parameters II

| Problems | Criteria | GA         | PSO        | ABC        | BA          | IA            | FA         |
|----------|----------|------------|------------|------------|-------------|---------------|------------|
| F11      | WORST    | 4037.4821  | 1156.5722  | 1370.7275  | 1522.5418   | 24385.5137    | 12969.0513 |
|          | AVERAGE  | 2174.0563  | 1132.0821  | 1165.0612  | 1354.5407   | 8353.2900     | 4263.6737  |
|          | BEST     | 1175.3990  | 1116.1924  | 1110.0201  | 1201.8259   | 1482.2015     | 1935.2462  |
|          | STD      | 870.5894   | 9.7998     | 60.9754    | 88.1860     | 6247.0261     | 2482.7799  |
| F12      | WORST    | 8.25E+06   | 6.23E+06   | 5.26E+06   | 5.93E+07    | 2.09E+09      | 2.89E+09   |
|          | AVERAGE  | 1.76E+06   | 1.70E+06   | 1.39E+06   | 3.02E+07    | 8.07E+08      | 1.60E+09   |
|          | BEST     | 3.94E+04   | 3.72E+05   | 3.67E+04   | 3.87E+06    | 5.93E+07      | 6.53E+08   |
|          | STD      | 2.17E+06   | 1.50E+06   | 1.49E+06   | 1.73E+07    | 5.91E+08      | 6.94E+08   |
| F13      | WORST    | 84588.7166 | 21490.8789 | 27014.0592 | 590333.0490 | 5.68E+08      | 2.60E+08   |
|          | AVERAGE  | 16779.9300 | 11265.2783 | 10696.9230 | 181817.9369 | 1.16E+08      | 6.50E+07   |
|          | BEST     | 1980.0603  | 3245.6987  | 1450.1610  | 12870.0225  | 2.04E+06      | 3.79E+05   |
|          | STD      | 18577.9024 | 5379.7453  | 8002.3558  | 168143.9022 | 1.34E+08      | 7.11E+07   |
| F14      | WORST    | 28520.0894 | 1714.7140  | 3337.6945  | 2199.6688   | 52205923.3257 | 2376.6788  |
|          | AVERAGE  | 11708.4218 | 1501.8460  | 1936.8328  | 1729.7779   | 5084187.4081  | 1624.4445  |
|          | BEST     | 2001.0514  | 1457.3747  | 1449.7191  | 1536.1625   | 14129.1998    | 1498.0962  |
|          | STD      | 8702.4732  | 55.2560    | 539.4378   | 160.3311    | 11664242.3421 | 201.6546   |
| F15      | WORST    | 24733.1817 | 3134.6553  | 7695.6944  | 8495.6651   | 64506520.5808 | 7500.9838  |
|          | AVERAGE  | 9217.6448  | 2084.4003  | 3000.9079  | 3608.7470   | 9804131.5114  | 3634.1296  |
|          | BEST     | 1605.2737  | 1617.6619  | 1525.1963  | 1712.3253   | 11235.1504    | 1975.0199  |
|          | STD      | 7316.5079  | 444.9278   | 1801.9131  | 1880.3650   | 15556751.1733 | 1415.7151  |
| F16      | WORST    | 1968.6782  | 2002.2392  | 1873.1774  | 1870.5312   | 2956.4111     | 2545.9691  |
|          | AVERAGE  | 1763.3005  | 1840.5082  | 1736.8620  | 1777.4975   | 2516.8678     | 2193.1383  |
|          | BEST     | 1643.2157  | 1626.9221  | 1607.4834  | 1664.2420   | 2252.5855     | 2043.2879  |

|     |         |             |            |            |             |           |           |
|-----|---------|-------------|------------|------------|-------------|-----------|-----------|
|     | STD     | 82.8026     | 93.2390    | 83.2100    | 51.3573     | 165.8699  | 115.3682  |
| F17 | WORST   | 2088.4884   | 1866.3015  | 1791.5456  | 1986.6794   | 2534.4223 | 2101.9442 |
|     | AVERAGE | 1877.0128   | 1770.9406  | 1738.9108  | 1828.1072   | 2247.9522 | 1959.1280 |
|     | BEST    | 1751.7689   | 1744.7146  | 1710.5733  | 1768.8475   | 1915.6422 | 1816.4383 |
|     | STD     | 93.8899     | 26.1898    | 20.4886    | 56.2214     | 174.0131  | 77.6369   |
| F18 | WORST   | 125590.4853 | 47418.7494 | 48063.4765 | 335294.3567 | 6.42E+08  | 1.01E+09  |
|     | AVERAGE | 39885.1487  | 17358.1941 | 13805.6390 | 147022.2323 | 1.80E+08  | 3.57E+08  |
|     | BEST    | 7765.2306   | 3955.5427  | 2257.0773  | 35514.5200  | 1.63E+06  | 1.50E+07  |
|     | STD     | 30064.0824  | 13494.5671 | 12608.0572 | 81887.0656  | 1.73E+08  | 2.88E+08  |
| F19 | WORST   | 105384.2283 | 32947.5105 | 6059.1043  | 17881.4047  | 1.27E+08  | 2.52E+07  |
|     | AVERAGE | 25012.3301  | 3772.6376  | 3106.6893  | 6203.4387   | 3.46E+07  | 1.30E+06  |
|     | BEST    | 5126.3290   | 1930.0002  | 1920.2789  | 2233.7969   | 6.77E+04  | 2.27E+03  |
|     | STD     | 23149.9743  | 6891.5050  | 1310.9271  | 4609.5706   | 3.59E+07  | 5.61E+06  |
| F20 | WORST   | 2122.2767   | 2249.3401  | 2060.9528  | 2237.1133   | 2704.3891 | 2238.1828 |
|     | AVERAGE | 2093.6119   | 2105.9744  | 2034.7185  | 2140.2372   | 2401.5719 | 2170.8424 |
|     | BEST    | 2062.6937   | 2040.7243  | 2014.5840  | 2083.1693   | 2257.4932 | 2116.6451 |
|     | STD     | 18.3889     | 58.7488    | 13.2951    | 50.9408     | 109.8474  | 38.0139   |

**Table S16.** Experiments on GA, PSO, ABC, BA, IA, FA for F21~F30 functions under D=10 on parameters II

| Problems | Criteria | GA        | PSO              | ABC       | BA        | IA        | FA        |
|----------|----------|-----------|------------------|-----------|-----------|-----------|-----------|
| F21      | WORST    | 2383.6664 | 2351.7331        | 2324.4959 | 2361.9872 | 2433.1603 | 2433.4311 |
|          | AVERAGE  | 2329.4202 | 2307.9176        | 2235.2340 | 2288.1882 | 2379.5349 | 2392.9446 |
|          | BEST     | 2253.9005 | 2200.8264        | 2213.6550 | 2209.1397 | 2263.7273 | 2244.6599 |
|          | STD      | 45.3174   | 55.1629          | 30.2953   | 70.1229   | 50.3126   | 42.5355   |
| F22      | WORST    | 3666.5753 | 2313.9677        | 2316.8517 | 3737.3941 | 3702.8272 | 4066.3402 |
|          | AVERAGE  | 2491.4775 | 2304.6520        | 2293.9515 | 2534.2558 | 3112.6705 | 3747.4094 |
|          | BEST     | 2300.7851 | 2217.2301        | 2232.3763 | 2393.6159 | 2512.9466 | 3134.9966 |
|          | STD      | 285.8952  | 25.1886          | 26.5692   | 286.4620  | 350.5046  | 300.9343  |
| F23      | WORST    | 2693.5923 | 2723.5935        | 2643.2668 | 2656.3747 | 2850.3192 | 2915.2974 |
|          | AVERAGE  | 2667.0841 | 2655.4026        | 2631.0413 | 2643.5294 | 2785.1359 | 2818.2927 |
|          | BEST     | 2644.2424 | 2627.8882        | 2617.1405 | 2624.5795 | 2717.4406 | 2748.5012 |
|          | STD      | 11.9340   | 22.5718          | 8.3798    | 7.6398    | 44.4148   | 40.3767   |
| F24      | WORST    | 2828.3221 | 2795.1476        | 2770.1593 | 2784.0787 | 2979.2901 | 3114.7373 |
|          | AVERAGE  | 2786.7387 | 2714.5386        | 2645.4603 | 2769.0073 | 2902.1641 | 2982.4910 |
|          | BEST     | 2738.6722 | <b>2479.1624</b> | 2514.7294 | 2619.9741 | 2763.6431 | 2851.5518 |
|          | STD      | 20.3221   | 109.1810         | 100.4541  | 35.2481   | 48.3858   | 70.0206   |
| F25      | WORST    | 3197.9132 | 2951.2394        | 2952.0462 | 3041.3684 | 4278.5860 | 5385.8293 |
|          | AVERAGE  | 3018.3218 | 2935.4116        | 2905.9681 | 3007.8212 | 3441.0874 | 4302.0044 |
|          | BEST     | 2956.5288 | 2900.4787        | 2681.5434 | 2946.0649 | 3107.2458 | 3524.2234 |
|          | STD      | 64.2262   | 20.0651          | 71.2296   | 23.6207   | 254.2840  | 522.2458  |
| F26      | WORST    | 4173.3170 | 4122.8505        | 3152.1819 | 4344.8127 | 4889.6006 | 5120.3438 |
|          | AVERAGE  | 3293.6125 | 3011.6323        | 2991.6324 | 3358.5104 | 4324.8546 | 4668.5367 |

|     |         |           |           |                |           |           |           |
|-----|---------|-----------|-----------|----------------|-----------|-----------|-----------|
|     | BEST    | 3026.4594 | 2896.3450 | 2826.1554      | 3059.0377 | 3431.6691 | 3800.4849 |
|     | STD     | 285.5019  | 268.2144  | <b>81.1300</b> | 472.5890  | 385.3743  | 348.9536  |
| F27 | WORST   | 3174.3059 | 3200.9266 | 3133.4754      | 3102.6670 | 3485.4095 | 3549.9650 |
|     | AVERAGE | 3132.4272 | 3127.9496 | 3104.3884      | 3100.5980 | 3297.2000 | 3341.3351 |
|     | BEST    | 3110.9745 | 3091.4512 | 3096.6610      | 3097.4336 | 3160.0558 | 3183.7829 |
|     | STD     | 16.5994   | 34.8071   | 9.0022         | 1.3876    | 109.0819  | 89.4165   |
| F28 | WORST   | 3682.5907 | 3446.5547 | 3384.9652      | 3736.4806 | 4278.2631 | 4513.0687 |
|     | AVERAGE | 3475.4590 | 3299.0817 | 3240.0847      | 3401.6621 | 3908.1634 | 4066.0256 |
|     | BEST    | 3311.3452 | 3115.9075 | 3122.7221      | 3232.4115 | 3317.6368 | 3649.4133 |
|     | STD     | 107.2597  | 136.6024  | 68.9899        | 101.7592  | 219.6879  | 187.7651  |
| F29 | WORST   | 3297.1770 | 3343.0052 | 3278.0378      | 3379.7694 | 4038.3000 | 3950.9794 |
|     | AVERAGE | 3227.3205 | 3246.6109 | 3213.6069      | 3250.4208 | 3545.2437 | 3603.6838 |
|     | BEST    | 3191.6828 | 3183.0534 | 3185.5247      | 3193.7286 | 3334.7097 | 3369.2902 |
|     | STD     | 28.0459   | 51.7246   | 27.3326        | 48.5503   | 167.4160  | 145.1674  |
| F30 | WORST   | 4.52E+06  | 1.92E+06  | 1.31E+06       | 1.53E+06  | 1.55E+08  | 1.06E+08  |
|     | AVERAGE | 1.78E+06  | 5.13E+05  | 4.59E+05       | 5.25E+05  | 6.03E+07  | 4.69E+07  |
|     | BEST    | 6.75E+03  | 1.15E+04  | 1.68E+04       | 7.22E+04  | 9.04E+06  | 2.17E+07  |
|     | STD     | 1.46E+06  | 6.79E+05  | 4.01E+05       | 4.80E+05  | 4.59E+07  | 2.08E+07  |

**Table S17.** Experiments on CS, DE, GSA, GWO, HS for F1~F10 functions under D=10 on parameters II

| Problems | Criteria | CS               | DE              | GSA             | GWO       | HS         |
|----------|----------|------------------|-----------------|-----------------|-----------|------------|
| F1       | WORST    | <b>1076.4756</b> | 5017.3758       | 1533.4813       | 4.65E+08  | 8.93E+08   |
|          | AVERAGE  | 517.6789         | 975.1618        | <b>331.9382</b> | 2.51E+07  | 3.71E+08   |
|          | BEST     | 169.8149         | 104.6067        | <b>100.4503</b> | 1.96E+03  | 6.96E+07   |
|          | STD      | <b>288.1456</b>  | 1313.3013       | 356.1735        | 1.04E+08  | 2.03E+08   |
| F2       | WORST    | <b>200.0000</b>  | 200.0235        | 200.0003        | 346.8184  | 1437.6374  |
|          | AVERAGE  | <b>200.0000</b>  | 200.0030        | 200.0002        | 283.3074  | 738.7239   |
|          | BEST     | <b>200.0000</b>  | 200.0001        | 200.0001        | 230.3800  | 479.3638   |
|          | STD      | <b>0.0000</b>    | 0.0065          | 0.0001          | 35.3684   | 298.1132   |
| F3       | WORST    | <b>300.0000</b>  | 10723.1440      | 5826.0969       | 6035.9473 | 34164.1058 |
|          | AVERAGE  | <b>300.0000</b>  | 5023.0775       | 3762.3300       | 2084.9336 | 21572.6330 |
|          | BEST     | <b>300.0000</b>  | 2278.9283       | 1774.4782       | 301.0396  | 12911.6672 |
|          | STD      | <b>0.0000</b>    | 2241.6998       | 1137.1101       | 1981.7546 | 5042.3402  |
| F4       | WORST    | <b>400.2190</b>  | 406.3474        | 405.2060        | 463.5713  | 490.8986   |
|          | AVERAGE  | <b>400.0404</b>  | 405.2721        | 404.8663        | 423.0225  | 443.4473   |
|          | BEST     | <b>400.0000</b>  | 403.4840        | 403.9679        | 406.8682  | 417.4061   |
|          | STD      | <b>0.0782</b>    | 0.8421          | 0.2941          | 23.1752   | 21.3706    |
| F5       | WORST    | 519.4028         | <b>513.4572</b> | 572.4818        | 535.8384  | 554.3909   |
|          | AVERAGE  | 512.7719         | <b>508.1124</b> | 557.9676        | 516.9237  | 545.3742   |
|          | BEST     | 507.1621         | <b>504.6060</b> | 539.7982        | 506.9684  | 528.8184   |
|          | STD      | 3.7850           | <b>2.3020</b>   | 9.3168          | 8.8714    | 5.9268     |
| F6       | WORST    | 604.7367         | <b>600.0000</b> | 631.3306        | 601.1598  | 614.2676   |

|     |         |           |                  |                 |                  |                 |
|-----|---------|-----------|------------------|-----------------|------------------|-----------------|
|     | AVERAGE | 602.3379  | <b>600.0000</b>  | 617.1124        | 600.3237         | 608.0923        |
|     | BEST    | 600.8024  | <b>600.0000</b>  | 600.9588        | 600.0209         | 603.2879        |
|     | STD     | 1.1074    | <b>0.0000</b>    | 9.7344          | 0.3683           | 2.9260          |
| F7  | WORST   | 732.8541  | 725.0128         | <b>716.5477</b> | 734.4778         | 803.0312        |
|     | AVERAGE | 724.7176  | 719.9736         | <b>713.2566</b> | 723.5415         | 779.9611        |
|     | BEST    | 715.4215  | 715.7673         | <b>711.5842</b> | 714.5896         | 743.0608        |
|     | STD     | 4.5268    | 2.7034           | <b>1.2967</b>   | 4.8252           | 12.2544         |
| F8  | WORST   | 820.6679  | <b>810.3681</b>  | 829.8487        | 823.2668         | 859.3237        |
|     | AVERAGE | 813.0465  | <b>807.7905</b>  | 821.6403        | 814.5633         | 847.1608        |
|     | BEST    | 808.4003  | <b>803.5114</b>  | 814.9244        | 806.0587         | 835.5997        |
|     | STD     | 3.3070    | <b>1.5529</b>    | 4.7648          | 4.9998           | 6.5257          |
| F9  | WORST   | 912.9918  | <b>900.0000</b>  | <b>900.0000</b> | 929.3882         | 1204.4281       |
|     | AVERAGE | 903.9051  | <b>900.0000</b>  | <b>900.0000</b> | 905.0330         | 1069.1380       |
|     | BEST    | 900.2415  | <b>900.0000</b>  | <b>900.0000</b> | 900.1115         | 953.2770        |
|     | STD     | 4.0440    | <b>0.0000</b>    | <b>0.0000</b>   | 9.1005           | 78.7224         |
| F10 | WORST   | 1859.6543 | <b>1811.7332</b> | 3228.9057       | 2002.4975        | 3138.8064       |
|     | AVERAGE | 1634.6155 | 1508.0356        | 2716.0971       | <b>1479.7272</b> | 2845.2813       |
|     | BEST    | 1327.7328 | 1243.5219        | 2148.3461       | <b>1125.3745</b> | 2530.6443       |
|     | STD     | 134.6371  | 124.7584         | 296.1864        | 273.3765         | <b>166.1419</b> |

**Table S18.** Experiments on CS, DE, GSA, GWO, HS for F11~F20 functions under D=10 on parameters II

| Problems | Criteria | CS               | DE               | GSA          | GWO          | HS            |
|----------|----------|------------------|------------------|--------------|--------------|---------------|
| F11      | WORST    | <b>1103.4535</b> | 1105.7367        | 1141.6115    | 1246.6665    | 5366.7683     |
|          | AVERAGE  | <b>1102.3624</b> | 1103.6712        | 1130.4248    | 1130.2942    | 1972.1574     |
|          | BEST     | <b>1101.3024</b> | 1101.7718        | 1120.8861    | 1104.3757    | 1141.9777     |
|          | STD      | <b>0.5534</b>    | 1.0413           | 6.1309       | 39.7118      | 1111.6315     |
| F12      | WORST    | <b>9871.6875</b> | 474220.7550      | 1090782.8790 | 2071164.7446 | 66752732.8937 |
|          | AVERAGE  | <b>4260.7200</b> | 173682.5701      | 228969.6393  | 571944.6198  | 21724123.3593 |
|          | BEST     | <b>2104.9026</b> | 34541.7217       | 17171.8552   | 12150.6858   | 946015.8839   |
|          | STD      | <b>1955.4371</b> | 122570.8224      | 251104.6842  | 624442.1407  | 16085400.4652 |
| F13      | WORST    | <b>1329.7357</b> | 3094.5689        | 15531.3863   | 38809.8919   | 235235.7472   |
|          | AVERAGE  | <b>1314.1597</b> | 1799.0782        | 10123.0779   | 10145.6124   | 26346.7100    |
|          | BEST     | <b>1306.1490</b> | 1311.7012        | 5572.3250    | 1593.0440    | 2318.1061     |
|          | STD      | <b>5.7875</b>    | 515.0584         | 2314.0566    | 8248.7736    | 50446.7335    |
| F14      | WORST    | 1423.1738        | <b>1422.9671</b> | 9208.9343    | 5206.9416    | 27549.7739    |
|          | AVERAGE  | <b>1415.4240</b> | 1418.5004        | 6465.8933    | 1830.2947    | 8674.4306     |
|          | BEST     | 1404.0726        | <b>1400.1588</b> | 2424.7236    | 1446.4773    | 1519.5658     |
|          | STD      | <b>4.7860</b>    | 6.4671           | 1951.0770    | 1076.4552    | 7996.1373     |
| F15      | WORST    | 1508.7066        | <b>1503.6013</b> | 22405.2216   | 10639.6820   | 19730.8307    |
|          | AVERAGE  | 1504.6297        | <b>1501.3508</b> | 14860.5805   | 3306.1135    | 7178.6816     |
|          | BEST     | 1501.9247        | <b>1500.2441</b> | 4685.5189    | 1542.5037    | 1954.1079     |
|          | STD      | 1.6828           | <b>0.7568</b>    | 4557.9763    | 2473.2560    | 5543.2150     |

|     |         |                  |                  |            |            |              |
|-----|---------|------------------|------------------|------------|------------|--------------|
| F16 | WORST   | <b>1619.9466</b> | 1677.6012        | 2307.4371  | 1747.8793  | 2164.1631    |
|     | AVERAGE | <b>1604.7764</b> | 1615.6894        | 2121.3020  | 1661.7262  | 1852.0701    |
|     | BEST    | <b>1601.9030</b> | 1601.4423        | 1971.9240  | 1611.2905  | 1610.2833    |
|     | STD     | <b>4.0252</b>    | 17.7320          | 107.8830   | 47.2137    | 168.0325     |
| F17 | WORST   | 1734.8782        | <b>1728.8660</b> | 2083.8743  | 1780.2139  | 1929.6820    |
|     | AVERAGE | 1728.3604        | <b>1717.8661</b> | 1892.1693  | 1739.0448  | 1783.4382    |
|     | BEST    | 1714.2548        | <b>1701.2059</b> | 1751.6342  | 1723.4893  | 1734.2012    |
|     | STD     | <b>4.2950</b>    | 7.5347           | 112.1760   | 14.2649    | 49.5300      |
| F18 | WORST   | 1993.0478        | <b>1825.8604</b> | 16700.2618 | 52690.6552 | 3633664.7291 |
|     | AVERAGE | 1910.7092        | <b>1820.4959</b> | 7923.4067  | 31902.0974 | 294984.8247  |
|     | BEST    | 1872.0218        | <b>1808.0896</b> | 2372.5642  | 6510.8951  | 5933.9184    |
|     | STD     | 36.3713          | <b>3.2291</b>    | 4769.6867  | 14545.2674 | 814119.3047  |
| F19 | WORST   | 1908.0176        | <b>1902.2375</b> | 14438.9499 | 14379.2615 | 20757.5333   |
|     | AVERAGE | 1904.4980        | <b>1901.2255</b> | 9642.4892  | 7673.2315  | 8897.9013    |
|     | BEST    | 1903.1015        | <b>1900.0202</b> | 4079.5312  | 1915.6802  | 2027.2034    |
|     | STD     | 1.2247           | <b>0.7577</b>    | 2562.0820  | 5636.1179  | 6503.2684    |
| F20 | WORST   | 2032.8012        | <b>2020.3122</b> | 2513.4301  | 2165.8621  | 2063.9171    |
|     | AVERAGE | 2025.1340        | <b>2013.9268</b> | 2300.5517  | 2055.9091  | 2040.5637    |
|     | BEST    | 2016.1679        | <b>2000.0000</b> | 2187.5272  | 2021.4792  | 2016.9453    |
|     | STD     | 4.1230           | <b>8.3835</b>    | 105.3874   | 46.7961    | 10.3323      |

**Table S19.** Experiments on CS, DE, GSA, GWO, HS for F21~F30 functions under D=10 on parameters II

| Problems | Criteria | CS               | DE               | GSA           | GWO       | HS            |
|----------|----------|------------------|------------------|---------------|-----------|---------------|
| F21      | WORST    | <b>2207.7760</b> | 2318.6119        | 2373.0173     | 2316.9546 | 2365.7061     |
|          | AVERAGE  | <b>2200.7595</b> | 2258.8043        | 2353.5436     | 2312.0586 | 2351.1191     |
|          | BEST     | <b>2200.0247</b> | 2207.2341        | 2308.4481     | 2303.1596 | 2330.8161     |
|          | STD      | <b>1.7367</b>    | 40.3733          | 13.3637       | 3.8869    | 9.5377        |
| F22      | WORST    | <b>2301.0085</b> | 2316.7355        | 2300.3444     | 2325.9712 | 2389.0919     |
|          | AVERAGE  | <b>2272.7439</b> | 2294.1542        | 2300.0172     | 2301.8063 | 2348.0831     |
|          | BEST     | <b>2200.3377</b> | 2244.0485        | 2300.0000     | 2216.1280 | 2324.7049     |
|          | STD      | 41.1782          | 21.9606          | <b>0.0770</b> | 21.1477   | 15.7895       |
| F23      | WORST    | <b>2623.0247</b> | 2623.8635        | 2921.4613     | 2633.9654 | 2666.0695     |
|          | AVERAGE  | 2613.2460        | <b>2602.6720</b> | 2753.7341     | 2618.0580 | 2651.6917     |
|          | BEST     | 2606.0644        | <b>2342.2329</b> | 2665.4136     | 2607.0633 | 2633.5175     |
|          | STD      | <b>4.2064</b>    | 61.3986          | 65.1570       | 8.3883    | 7.6092        |
| F24      | WORST    | <b>2740.7390</b> | 2753.8683        | 2833.8700     | 2767.1579 | 2796.7410     |
|          | AVERAGE  | <b>2541.5925</b> | 2714.7336        | 2577.0220     | 2745.1314 | 2784.4970     |
|          | BEST     | 2500.1082        | 2568.6296        | 2500.0000     | 2719.2782 | 2759.7059     |
|          | STD      | 65.6552          | 58.7242          | 137.4647      | 11.7589   | <b>8.2495</b> |
| F25      | WORST    | <b>2897.7693</b> | 2908.7463        | 2943.4275     | 2949.8678 | 2982.0717     |
|          | AVERAGE  | <b>2830.2786</b> | 2901.3001        | 2932.2354     | 2934.7401 | 2969.2756     |
|          | BEST     | <b>2600.8637</b> | 2876.1595        | 2897.7429     | 2902.4045 | 2938.7348     |

|     |         |                  |                  |             |                  |               |
|-----|---------|------------------|------------------|-------------|------------------|---------------|
|     | STD     | 108.8964         | <b>6.3482</b>    | 19.7824     | 16.3742          | 10.0762       |
| F26 | WORST   | <b>2900.0000</b> | 3055.2155        | 4353.2858   | 3920.4319        | 4293.4237     |
|     | AVERAGE | <b>2781.9601</b> | 2933.3932        | 3474.9216   | 2977.7156        | 3438.4981     |
|     | BEST    | <b>2600.0016</b> | 2649.7546        | 2800.0000   | 2804.8923        | 3065.1758     |
|     | STD     | 83.8621          | 103.0029         | 601.0464    | 238.3505         | 457.7364      |
| F27 | WORST   | <b>3090.9235</b> | 3097.3514        | 3281.8367   | 3101.1309        | 3135.7256     |
|     | AVERAGE | 3088.7899        | <b>3076.3536</b> | 3217.8850   | 3094.0179        | 3113.3778     |
|     | BEST    | 3086.0324        | <b>3071.3298</b> | 3159.8206   | 3090.7550        | 3102.5831     |
|     | STD     | <b>1.3093</b>    | 7.3384           | 30.2043     | 2.3634           | 7.4436        |
| F28 | WORST   | <b>3198.0805</b> | 3279.8790        | 3383.7452   | 3452.3449        | 3559.8840     |
|     | AVERAGE | <b>3093.3118</b> | 3272.9850        | 3337.8885   | 3387.1970        | 3492.0408     |
|     | BEST    | <b>2807.6164</b> | 3272.5005        | 3142.5767   | 3166.8217        | 3451.4252     |
|     | STD     | 85.6125          | <b>1.6751</b>    | 94.1646     | 69.0834          | 24.8553       |
| F29 | WORST   | <b>3192.3787</b> | 3204.8603        | 3566.5841   | 3316.1184        | 3487.4070     |
|     | AVERAGE | 3176.5524        | <b>3173.3913</b> | 3359.5530   | 3195.4632        | 3349.7998     |
|     | BEST    | 3159.3304        | 3157.1576        | 3236.3458   | <b>3143.8873</b> | 3235.8554     |
|     | STD     | <b>9.8669</b>    | 11.9988          | 121.2545    | 48.0125          | 67.8582       |
| F30 | WORST   | 82809.4674       | <b>5540.5133</b> | 463649.7811 | 2892975.6363     | 10482758.8654 |
|     | AVERAGE | 21099.2980       | <b>3794.2750</b> | 286315.8091 | 367496.6630      | 5316293.0365  |
|     | BEST    | 5595.3505        | <b>3271.7034</b> | 185114.2406 | 7542.8492        | 884189.5561   |
|     | STD     | 19722.7860       | <b>604.9856</b>  | 68520.4244  | 811324.3234      | 2883209.7467  |

## Supplementary Material E

**Table S20.** Experiments on GA, PSO, ABC, BA, IA, FA for F1~F10 functions under D=50 on parameters II

| Problems | Criteria | GA          | PSO              | ABC         | BA          | IA          | FA          |
|----------|----------|-------------|------------------|-------------|-------------|-------------|-------------|
| F1       | WORST    | 5.52E+10    | 4.39E+09         | 4.47E+08    | 7.47E+10    | 1.02E+11    | 2.32E+11    |
|          | AVERAGE  | 1.69E+10    | 1.63E+09         | 1.82E+08    | 5.72E+10    | 8.72E+10    | 2.12E+11    |
|          | BEST     | 1.87E+09    | 8.22E+08         | 8.97E+07    | 4.06E+10    | 6.72E+10    | 1.87E+11    |
|          | STD      | 1.54E+10    | 1.03E+09         | 7.86E+07    | 8.91E+09    | 8.40E+09    | 1.12E+10    |
| F2       | WORST    | 2782.8922   | 1033.1516        | 826.5971    | 15827.8700  | 54822.3725  | 114077.8953 |
|          | AVERAGE  | 1535.0162   | 598.4002         | 569.7591    | 13133.7590  | 32403.3999  | 86243.8099  |
|          | BEST     | 783.9794    | 464.8501         | 413.1991    | 8716.0405   | 11118.8293  | 56096.6917  |
|          | STD      | 594.9337    | 128.2569         | 89.4477     | 1750.9338   | 13372.3934  | 13351.3703  |
| F3       | WORST    | 533592.9925 | <b>4757.6652</b> | 283023.6727 | 211751.5856 | 261502.1075 | 293392.2710 |
|          | AVERAGE  | 360450.8232 | <b>2752.3789</b> | 234430.8342 | 136825.5969 | 187406.9650 | 246396.4930 |
|          | BEST     | 247109.2389 | <b>2135.9651</b> | 167806.2310 | 103501.8348 | 128660.4869 | 211186.9448 |
|          | STD      | 78942.4245  | <b>563.6748</b>  | 25044.1405  | 28418.6567  | 30272.9066  | 21217.7396  |
| F4       | WORST    | 1828.8990   | 795.6833         | 732.6160    | 8583.5715   | 33701.5203  | 85375.5026  |
|          | AVERAGE  | 1135.3336   | 677.3199         | 666.2757    | 5720.7029   | 23723.0695  | 73052.5659  |
|          | BEST     | 912.1736    | 605.7730         | 578.0114    | 3730.2723   | 12005.4899  | 57842.5868  |
|          | STD      | 243.7415    | 50.4315          | 39.8513     | 1408.1111   | 6207.7553   | 7541.8522   |
| F5       | WORST    | 1194.1399   | 1012.1986        | 866.9814    | 1171.3619   | 1174.2913   | 1517.1914   |

|     |         |                  |                |            |            |            |            |
|-----|---------|------------------|----------------|------------|------------|------------|------------|
|     | AVERAGE | 1150.8908        | 956.3243       | 823.6456   | 1113.5197  | 1086.1935  | 1471.2551  |
|     | BEST    | 1092.6934        | 878.5167       | 791.0720   | 1063.1667  | 1004.6972  | 1384.2181  |
|     | STD     | 26.1023          | 33.4707        | 22.6799    | 34.3148    | 54.4744    | 32.5769    |
| F6  | WORST   | 711.5919         | 672.6796       | 610.1317   | 695.3713   | 692.9603   | 746.2426   |
|     | AVERAGE | 699.5832         | 633.4833       | 606.6864   | 677.5325   | 681.8262   | 735.9741   |
|     | BEST    | 688.3985         | 613.0252       | 603.4044   | 660.2245   | 667.7494   | 715.3807   |
|     | STD     | 6.0323           | 19.0652        | 1.7660     | 7.4258     | 6.9449     | 7.1707     |
| F7  | WORST   | 2928.2344        | 1179.2866      | 1250.0883  | 3704.2626  | 2007.7884  | 7118.5317  |
|     | AVERAGE | 2425.6521        | 1143.9483      | 1185.6344  | 3003.2223  | 1797.3088  | 6045.7552  |
|     | BEST    | 2124.6944        | 1105.7473      | 1118.9204  | 2446.4701  | 1549.2024  | 5199.2272  |
|     | STD     | 213.5904         | <b>19.9434</b> | 46.6045    | 339.7349   | 116.3468   | 425.0864   |
| F8  | WORST   | 1578.9517        | 1324.3713      | 1188.7115  | 1515.8357  | 1497.3913  | 2126.6961  |
|     | AVERAGE | 1477.7033        | 1254.3281      | 1116.4288  | 1408.5623  | 1400.8012  | 1974.2669  |
|     | BEST    | 1424.6589        | 1184.7868      | 1029.6923  | 1288.9790  | 1268.8389  | 1884.2173  |
|     | STD     | 40.8644          | 32.7313        | 43.2545    | 51.5347    | 55.3204    | 61.4622    |
| F9  | WORST   | <b>5583.4508</b> | 27506.4820     | 20264.0495 | 36295.8888 | 29208.2062 | 77934.1237 |
|     | AVERAGE | 4204.2256        | 16425.6283     | 15186.6662 | 25365.5098 | 21836.2272 | 63229.3904 |
|     | BEST    | 2920.8163        | 1469.6796      | 8932.9540  | 18980.5360 | 14403.2623 | 47487.5069 |
|     | STD     | <b>717.0423</b>  | 7576.3715      | 2979.9226  | 4748.9219  | 3334.4259  | 6653.2661  |
| F10 | WORST   | 13729.5877       | 12895.3609     | 8487.5165  | 15088.4108 | 14203.1466 | 16297.8131 |
|     | AVERAGE | 13350.5961       | 11828.9022     | 7675.1253  | 14498.9649 | 12593.8334 | 15594.9358 |
|     | BEST    | 12805.2064       | 10228.0732     | 6246.5725  | 13522.3007 | 10509.4777 | 14864.9601 |
|     | STD     | <b>243.1707</b>  | 734.4923       | 531.5367   | 467.6222   | 996.5649   | 346.0301   |

**Table S21.** Experiments on GA, PSO, ABC, BA, IA, FA for F11~F20 functions under D=50 on parameters II

| Problems | Criteria | GA         | PSO       | ABC        | BA         | IA         | FA         |
|----------|----------|------------|-----------|------------|------------|------------|------------|
| F11      | WORST    | 42023.8404 | 1771.4980 | 13198.9035 | 15595.6062 | 52584.4303 | 96170.6263 |
|          | AVERAGE  | 19682.8094 | 1594.6961 | 6421.7427  | 8775.2771  | 31869.7460 | 61168.6025 |
|          | BEST     | 3138.1364  | 1487.5909 | 2689.2034  | 6341.2968  | 17316.4525 | 41221.1994 |
|          | STD      | 11057.4559 | 69.6286   | 2642.4495  | 2174.6617  | 11155.1756 | 13372.7378 |
| F12      | WORST    | 8.70E+07   | 2.98E+09  | 1.51E+08   | 1.84E+10   | 9.43E+10   | 2.14E+11   |
|          | AVERAGE  | 4.25E+07   | 5.52E+08  | 8.85E+07   | 1.43E+10   | 6.02E+10   | 1.58E+11   |
|          | BEST     | 1.41E+07   | 2.43E+08  | 3.24E+07   | 9.50E+09   | 2.26E+10   | 1.14E+11   |
|          | STD      | 2.09E+07   | 6.02E+08  | 3.05E+07   | 2.46E+09   | 1.89E+10   | 2.95E+10   |
| F13      | WORST    | 1.08E+09   | 3.01E+08  | 1.65E+07   | 7.38E+09   | 5.46E+10   | 1.50E+11   |
|          | AVERAGE  | 3.07E+08   | 1.01E+08  | 5.91E+06   | 4.92E+09   | 3.49E+10   | 1.07E+11   |
|          | BEST     | 1.15E+06   | 6.70E+07  | 9.42E+05   | 2.91E+09   | 1.11E+10   | 8.04E+10   |
|          | STD      | 3.25E+08   | 4.85E+07  | 3.67E+06   | 1.23E+09   | 1.21E+10   | 1.89E+10   |
| F14      | WORST    | 2.01E+07   | 2.28E+05  | 4.72E+06   | 3.23E+06   | 2.51E+08   | 8.03E+08   |
|          | AVERAGE  | 8.47E+06   | 9.75E+04  | 2.22E+06   | 1.88E+06   | 1.34E+08   | 4.42E+08   |
|          | BEST     | 1.85E+06   | 4.70E+04  | 7.56E+05   | 8.65E+05   | 2.17E+07   | 1.23E+08   |
|          | STD      | 5.64E+06   | 4.83E+04  | 1.12E+06   | 5.81E+05   | 7.08E+07   | 2.27E+08   |



|     |         |           |           |           |           |            |                |
|-----|---------|-----------|-----------|-----------|-----------|------------|----------------|
| F15 | WORST   | 2.28E+07  | 3.26E+07  | 3.94E+06  | 2.61E+09  | 2.34E+10   | 4.72E+10       |
|     | AVERAGE | 1.89E+06  | 1.89E+07  | 1.28E+06  | 1.47E+09  | 1.03E+10   | 3.31E+10       |
|     | BEST    | 1.24E+05  | 1.15E+07  | 2.17E+05  | 8.60E+08  | 4.59E+09   | 1.06E+10       |
|     | STD     | 4.94E+06  | 6.14E+06  | 9.12E+05  | 4.69E+08  | 4.55E+09   | 9.60E+09       |
| F16 | WORST   | 5195.9228 | 4134.4334 | 3740.7838 | 6258.0901 | 9618.2642  | 11662.4132     |
|     | AVERAGE | 4694.3398 | 3748.1565 | 3484.3272 | 5579.6209 | 7680.6217  | 10107.3127     |
|     | BEST    | 3899.2611 | 3104.9768 | 2972.3926 | 4748.3437 | 5337.4751  | 8869.8509      |
|     | STD     | 353.2299  | 284.4417  | 219.8086  | 344.7406  | 1226.6435  | 716.7178       |
| F17 | WORST   | 4245.3284 | 3342.0289 | 3764.2402 | 6154.2024 | 60698.9996 | 111842.6232    |
|     | AVERAGE | 3588.7242 | 3071.2084 | 3324.5436 | 5682.5801 | 24651.6490 | 45775.4831     |
|     | BEST    | 2784.2982 | 2657.2668 | 2951.3407 | 5099.0902 | 4895.2627  | 20271.3684     |
|     | STD     | 374.3512  | 192.4273  | 209.5900  | 367.7366  | 15844.6521 | 25348.1867     |
| F18 | WORST   | 1.83E+07  | 2.94E+06  | 1.45E+07  | 3.55E+07  | 5.98E+08   | 2.16E+08       |
|     | AVERAGE | 9.46E+06  | 1.11E+06  | 5.84E+06  | 1.78E+07  | 2.70E+08   | 1.36E+08       |
|     | BEST    | 2.51E+06  | 2.90E+05  | 9.85E+05  | 4.95E+06  | 5.11E+07   | 2.84E+07       |
|     | STD     | 5.06E+06  | 6.13E+05  | 3.35E+06  | 8.84E+06  | 1.27E+08   | 5.35E+07       |
| F19 | WORST   | 2.12E+07  | 1.51E+07  | 2.48E+06  | 1.30E+09  | 9.35E+09   | 8.98E+09       |
|     | AVERAGE | 3.41E+06  | 1.07E+07  | 8.90E+05  | 8.45E+08  | 6.18E+09   | 6.40E+09       |
|     | BEST    | 5.50E+04  | 4.52E+06  | 1.94E+05  | 4.14E+08  | 2.73E+09   | 3.49E+09       |
|     | STD     | 6.33E+06  | 2.79E+06  | 5.24E+05  | 2.89E+08  | 1.97E+09   | 1.46E+09       |
| F20 | WORST   | 3908.1892 | 3368.3793 | 3409.2399 | 4286.9696 | 5075.6484  | 4131.1580      |
|     | AVERAGE | 3582.5636 | 3017.4712 | 3196.1747 | 3925.1426 | 4523.0346  | 3975.5235      |
|     | BEST    | 3146.9237 | 2724.8876 | 2849.7969 | 3530.8759 | 3898.4568  | 3781.1601      |
|     | STD     | 224.0137  | 172.7679  | 149.6793  | 190.5818  | 247.0872   | <b>78.4267</b> |

**Table S22.** Experiments on GA, PSO, ABC, BA, IA, FA for F21~F30 functions under D=50 on parameters II

| Problems | Criteria | GA         | PSO              | ABC              | BA         | IA         | FA              |
|----------|----------|------------|------------------|------------------|------------|------------|-----------------|
| F21      | WORST    | 3067.2516  | 2827.4778        | 2698.4521        | 2944.8609  | 3051.0879  | 3390.1404       |
|          | AVERAGE  | 3001.0288  | 2745.9920        | 2636.8520        | 2883.7604  | 2955.1159  | 3326.1440       |
|          | BEST     | 2929.1076  | 2660.8035        | 2544.3224        | 2820.1811  | 2872.6660  | 3276.6003       |
|          | STD      | 35.1630    | 39.8747          | 43.4486          | 29.1168    | 49.6079    | 30.1564         |
| F22      | WORST    | 15691.3486 | 14701.7603       | 10052.5980       | 16640.3030 | 15551.4069 | 16422.5311      |
|          | AVERAGE  | 15154.5426 | 12335.0426       | 8421.6470        | 16030.5488 | 14613.6840 | 16074.4863      |
|          | BEST     | 14691.5377 | 2603.2019        | <b>2484.6669</b> | 15360.9258 | 13604.1209 | 15735.5875      |
|          | STD      | 285.8160   | 3389.3658        | 2411.3830        | 435.3442   | 521.6766   | <b>193.4803</b> |
| F23      | WORST    | 3752.0934  | 3473.5210        | 3193.7997        | 3387.2387  | 4454.9893  | 4966.7873       |
|          | AVERAGE  | 3611.8158  | 3304.8618        | 3127.6773        | 3320.6175  | 4060.5993  | 4721.2806       |
|          | BEST     | 3491.4479  | 3183.1855        | 3004.0619        | 3226.6226  | 3561.8578  | 4494.5015       |
|          | STD      | 76.0155    | 85.5211          | 44.2970          | 38.1299    | 232.5663   | 137.2579        |
| F24      | WORST    | 3849.8731  | 3764.7307        | 3804.3937        | 3508.7896  | 4827.2732  | 5500.6303       |
|          | AVERAGE  | 3735.2371  | 3518.9576        | 3658.9288        | 3419.9685  | 4419.8556  | 5222.5306       |
|          | BEST     | 3593.3468  | <b>3339.7439</b> | 3538.5500        | 3369.0480  | 4081.8816  | 4811.9248       |

|     |         |            |            |           |            |             |             |
|-----|---------|------------|------------|-----------|------------|-------------|-------------|
|     | STD     | 63.7835    | 121.4349   | 77.3406   | 32.7249    | 201.8217    | 185.2407    |
| F25 | WORST   | 5065.6496  | 3198.0601  | 3251.8809 | 10195.8987 | 14257.1282  | 47503.4543  |
|     | AVERAGE | 4197.5441  | 3137.7268  | 3160.4099 | 7617.6946  | 11858.8900  | 41705.3656  |
|     | BEST    | 3736.3339  | 3078.8722  | 3108.2993 | 5079.5329  | 9707.0934   | 36944.5538  |
|     | STD     | 306.5150   | 32.8146    | 39.4271   | 1529.4270  | 1219.5635   | 2895.2080   |
| F26 | WORST   | 11342.0892 | 10169.0677 | 8514.5987 | 10947.2356 | 17598.2626  | 29393.8561  |
|     | AVERAGE | 10742.2475 | 6266.0452  | 7553.3539 | 10133.4218 | 15620.4769  | 26017.9166  |
|     | BEST    | 10142.2326 | 3274.0813  | 4817.0579 | 9347.6623  | 13596.0377  | 23576.7486  |
|     | STD     | 305.5508   | 2585.4281  | 761.5220  | 460.7429   | 1168.9385   | 1225.3744   |
| F27 | WORST   | 4244.1636  | 3699.8288  | 3611.4196 | 3933.6564  | 6442.0521   | 7722.1762   |
|     | AVERAGE | 4181.2403  | 3484.2780  | 3510.4484 | 3721.8451  | 5880.7913   | 7221.5814   |
|     | BEST    | 4069.5152  | 3297.7131  | 3427.3176 | 3579.7186  | 4906.6178   | 6659.3978   |
|     | STD     | 52.4450    | 124.1141   | 53.1121   | 96.9917    | 418.9433    | 330.3945    |
| F28 | WORST   | 5693.0836  | 3831.9357  | 3509.1879 | 9138.4255  | 13050.8180  | 20971.4850  |
|     | AVERAGE | 4970.3333  | 3433.9171  | 3419.8297 | 6070.4390  | 10248.2415  | 18952.8527  |
|     | BEST    | 4290.0374  | 3339.6835  | 3356.6620 | 4850.6405  | 8200.8957   | 17234.3131  |
|     | STD     | 374.6803   | 132.1411   | 39.8936   | 1073.0502  | 1294.5342   | 1025.3615   |
| F29 | WORST   | 5598.6883  | 5769.4020  | 4537.0274 | 7860.1918  | 443303.3837 | 273275.8639 |
|     | AVERAGE | 5198.9752  | 5071.0403  | 4284.2107 | 7039.4956  | 50305.8604  | 109857.6966 |
|     | BEST    | 4768.3783  | 4727.1315  | 3820.4656 | 6149.7317  | 7371.5852   | 29241.8564  |
|     | STD     | 235.4118   | 318.1987   | 187.8299  | 470.0569   | 93747.4193  | 60597.5035  |
| F30 | WORST   | 1.28E+07   | 1.18E+08   | 7.38E+06  | 1.67E+09   | 1.45E+10    | 1.36E+10    |
|     | AVERAGE | 6.89E+06   | 9.99E+07   | 2.96E+06  | 1.05E+09   | 7.63E+09    | 9.29E+09    |
|     | BEST    | 3.15E+06   | 8.35E+07   | 1.85E+06  | 4.35E+08   | 1.98E+09    | 5.45E+09    |
|     | STD     | 3.00E+06   | 1.08E+07   | 1.19E+06  | 3.34E+08   | 2.82E+09    | 2.45E+09    |

**Table S23.** Experiments on CS, DE, GSA, GWO, HS for F1~F10 functions under D=50 on parameters II

| Problems | Criteria | CS              | DE              | GSA             | GWO         | HS          |
|----------|----------|-----------------|-----------------|-----------------|-------------|-------------|
| F1       | WORST    | <b>1.02E+04</b> | 2.28E+06        | 3.19E+04        | 1.51E+10    | 2.09E+10    |
|          | AVERAGE  | <b>2.56E+03</b> | 2.05E+05        | 5.60E+03        | 6.91E+09    | 1.59E+10    |
|          | BEST     | 1.11E+02        | 1.29E+02        | <b>1.08E+02</b> | 1.31E+09    | 9.54E+09    |
|          | STD      | <b>2.95E+03</b> | 5.27E+05        | 8.11E+03        | 3.22E+09    | 2.99E+09    |
| F2       | WORST    | <b>200.0040</b> | 31746.9347      | 1160.7739       | 3344.8424   | 18303.8527  |
|          | AVERAGE  | <b>200.0014</b> | 12700.4051      | 406.0398        | 1731.4057   | 12783.1568  |
|          | BEST     | <b>200.0007</b> | 2532.9496       | 200.0010        | 1024.6372   | 8637.2173   |
|          | STD      | <b>0.0008</b>   | 7895.1983       | 245.9467        | 569.6310    | 2599.8748   |
| F3       | WORST    | 24646.6848      | 599286.3290     | 250255.0595     | 111247.4266 | 389498.9094 |
|          | AVERAGE  | 20159.3035      | 343488.8294     | 186204.8178     | 77105.8233  | 300852.6311 |
|          | BEST     | 14808.0367      | 149800.6154     | 128813.1440     | 44123.6892  | 229674.3931 |
|          | STD      | 2536.1061       | 140460.7328     | 28980.7509      | 17636.9544  | 46049.3862  |
| F4       | WORST    | 579.9845        | <b>447.0451</b> | 648.8019        | 1468.5626   | 2905.2431   |
|          | AVERAGE  | <b>437.5964</b> | 444.1200        | 512.8025        | 1015.7883   | 2361.5973   |

|     |         |                 |                  |                  |                  |                |
|-----|---------|-----------------|------------------|------------------|------------------|----------------|
|     | BEST    | <b>400.0001</b> | 439.4522         | 429.7586         | 699.0085         | 1852.4819      |
|     | STD     | 44.1811         | <b>2.0625</b>    | 62.6456          | 242.0154         | 265.2721       |
| F5  | WORST   | 860.1851        | 885.7122         | 852.2128         | <b>755.1916</b>  | 1023.2403      |
|     | AVERAGE | 771.7189        | 826.3423         | 798.3474         | <b>694.1462</b>  | 986.4360       |
|     | BEST    | 702.5253        | 766.9366         | 690.0366         | <b>613.7003</b>  | 945.6314       |
|     | STD     | 40.2967         | 34.0013          | 47.1856          | 30.8246          | <b>21.0967</b> |
| F6  | WORST   | 656.7505        | <b>600.0001</b>  | 643.4854         | 622.6816         | 625.8855       |
|     | AVERAGE | 633.4571        | <b>600.0000</b>  | 632.0601         | 612.0397         | 621.6597       |
|     | BEST    | 620.6616        | <b>600.0000</b>  | 617.3588         | 604.3734         | 615.7079       |
|     | STD     | 9.0591          | <b>0.0000</b>    | 7.6244           | 4.2024           | 2.2576         |
| F7  | WORST   | 1194.3518       | 1134.4017        | <b>993.4898</b>  | 1224.7953        | 1660.9620      |
|     | AVERAGE | 1090.4073       | 1061.7652        | <b>940.9815</b>  | 1036.2680        | 1575.7428      |
|     | BEST    | 981.0081        | 1016.3575        | <b>858.5536</b>  | 915.7978         | 1489.7964      |
|     | STD     | 64.4202         | 32.0684          | 42.1220          | 81.5279          | 51.6151        |
| F8  | WORST   | 1105.6050       | 1188.3912        | 1197.9794        | <b>1038.3122</b> | 1326.5756      |
|     | AVERAGE | 1072.3991       | 1133.1929        | 1090.7749        | <b>984.2740</b>  | 1287.7225      |
|     | BEST    | 996.0272        | 1069.3994        | 999.9856         | <b>953.3614</b>  | 1244.6120      |
|     | STD     | 28.6534         | 34.0119          | 45.8231          | 23.1301          | <b>21.2813</b> |
| F9  | WORST   | 19437.7861      | 11439.0101       | 14233.5154       | 6137.3049        | 10614.0874     |
|     | AVERAGE | 11788.9383      | <b>2175.8717</b> | 7748.5029        | 4254.8037        | 8663.7850      |
|     | BEST    | 4660.4465       | <b>900.0000</b>  | 2774.5532        | 1838.5635        | 6557.6438      |
|     | STD     | 4163.3156       | 3020.7771        | 2607.9157        | 1125.1342        | 1150.2789      |
| F10 | WORST   | 7781.1331       | 13251.2678       | <b>7777.4551</b> | 7803.9818        | 16179.0376     |
|     | AVERAGE | 7123.3675       | 12547.1238       | <b>5914.0745</b> | 6634.7765        | 15339.7986     |
|     | BEST    | 6402.3487       | 11869.7523       | <b>4785.6608</b> | 4936.5436        | 14537.0111     |
|     | STD     | 338.6191        | 353.7371         | 742.9287         | 718.9209         | 486.3024       |

**Table S24.** Experiments on CS, DE, GSA, GWO, HS for F11~F20 functions under D=50 on parameters II

| Problems | Criteria | CS                  | DE             | GSA             | GWO             | HS              |
|----------|----------|---------------------|----------------|-----------------|-----------------|-----------------|
| F11      | WORST    | <b>1278.8586</b>    | 1429.5106      | 1358.0257       | 8304.7295       | 16540.5087      |
|          | AVERAGE  | <b>1219.6203</b>    | 1272.4814      | 1274.2403       | 3890.2435       | 8986.1731       |
|          | BEST     | <b>1176.1034</b>    | 1183.1005      | 1223.6732       | 1569.7636       | 4587.6185       |
|          | STD      | <b>25.5339</b>      | 65.7866        | 38.1853         | 2029.2717       | 3099.6564       |
| F12      | WORST    | <b>1189378.0401</b> | 913826751.5221 | 1958638508.2824 | 3242031151.7423 | 2873752281.9699 |
|          | AVERAGE  | <b>225468.9250</b>  | 341901976.4075 | 198558063.0178  | 645808708.6912  | 1954516267.5605 |
|          | BEST     | <b>55980.1229</b>   | 9197187.1652   | 220703.8490     | 14137838.1221   | 1010017054.3358 |
|          | STD      | <b>239295.4412</b>  | 285665724.3724 | 601857300.9132  | 795758292.4735  | 466617471.2543  |
| F13      | WORST    | <b>12170.2928</b>   | 14638693.2685  | 100951.2753     | 270296041.1967  | 34847617.6307   |
|          | AVERAGE  | <b>4235.0145</b>    | 1576472.9219   | 53226.9458      | 88745935.4705   | 9486211.3689    |
|          | BEST     | <b>1881.7308</b>    | 2963.1522      | 17410.9476      | 70190.2883      | 2912529.4497    |
|          | STD      | <b>2488.4476</b>    | 3397210.3615   | 21780.1504      | 99834371.4392   | 7625090.7050    |
| F14      | WORST    | <b>1653.3011</b>    | 1186498.6957   | 1655418.3676    | 1773865.8031    | 7892649.6700    |

|     |         |                   |                  |             |                  |                 |
|-----|---------|-------------------|------------------|-------------|------------------|-----------------|
|     | AVERAGE | <b>1576.4108</b>  | 646653.8323      | 274053.6361 | 428541.8600      | 2653158.6347    |
|     | BEST    | <b>1530.5724</b>  | 149012.4651      | 9701.7349   | 66804.2167       | 431043.8654     |
|     | STD     | <b>31.7176</b>    | 274498.9123      | 413231.3400 | 430925.1789      | 1848307.9429    |
| F15 | WORST   | <b>2417.2182</b>  | 1943938.5892     | 27128.0181  | 23031112.0001    | 848022.8190     |
|     | AVERAGE | <b>1955.8472</b>  | 225246.8548      | 13994.9924  | 5877693.2831     | 485170.0594     |
|     | BEST    | <b>1624.9900</b>  | 2943.6671        | 2498.3600   | 22774.9968       | 227782.4947     |
|     | STD     | <b>194.7719</b>   | 482929.2636      | 7764.0556   | 7356137.2720     | 177920.6769     |
| F16 | WORST   | 3710.7154         | 4592.3427        | 4438.2704   | <b>3525.1813</b> | 5803.3860       |
|     | AVERAGE | 3039.5539         | 3618.7916        | 3582.8471   | <b>2902.5948</b> | 5461.5869       |
|     | BEST    | 2420.9349         | 2711.3435        | 2800.9628   | <b>2370.1324</b> | 4968.3543       |
|     | STD     | 302.0266          | 535.5853         | 456.8734    | 352.9859         | <b>208.4959</b> |
| F17 | WORST   | 3080.7350         | 3299.7806        | 4087.7622   | <b>3054.8805</b> | 4509.0647       |
|     | AVERAGE | 2777.2827         | 2787.9559        | 3456.2627   | <b>2590.2032</b> | 4168.4980       |
|     | BEST    | 2386.9796         | 2450.5866        | 2892.2004   | <b>2128.5445</b> | 3605.5149       |
|     | STD     | <b>184.3244</b>   | 201.1050         | 301.3372    | 266.9205         | 214.5706        |
| F18 | WORST   | <b>68008.1830</b> | 5803384.3885     | 427546.7264 | 6711292.3523     | 81556914.0223   |
|     | AVERAGE | <b>33245.6856</b> | 2736637.7438     | 234512.6965 | 2147793.2880     | 41585252.6341   |
|     | BEST    | <b>14261.2839</b> | 1020141.5365     | 66853.3640  | 154053.5460      | 6812617.2183    |
|     | STD     | <b>16319.8771</b> | 1463962.4900     | 103709.4889 | 1700898.8177     | 22392361.8821   |
| F19 | WORST   | <b>2681.6258</b>  | 15864.8916       | 44543.3323  | 99644506.4445    | 428103.9806     |
|     | AVERAGE | <b>2154.7850</b>  | <b>8603.8377</b> | 18876.4095  | 5535469.8611     | 282197.9220     |
|     | BEST    | <b>1976.8392</b>  | 4424.7155        | 5184.6738   | 127697.5696      | 111829.0122     |
|     | STD     | <b>187.2113</b>   | 3122.4493        | 11523.2381  | 22156091.0669    | 80401.6411      |
| F20 | WORST   | 3063.6312         | <b>2983.1790</b> | 4067.4460   | 3209.1226        | 4476.5701       |
|     | AVERAGE | 2777.1247         | 2719.9998        | 3445.8669   | <b>2702.6666</b> | 4154.8426       |
|     | BEST    | 2393.5808         | 2503.3890        | 3051.9019   | <b>2287.7058</b> | 3761.6049       |
|     | STD     | 208.0133          | 142.8749         | 314.8358    | 217.2997         | 195.6939        |

**Table S25.** Experiments on CS, DE, GSA, GWO, HS for F21~F30 functions under D=50 on parameters II

| Problems | Criteria | CS        | DE         | GSA        | GWO              | HS             |
|----------|----------|-----------|------------|------------|------------------|----------------|
| F21      | WORST    | 2595.5734 | 2687.2439  | 2734.0048  | <b>2550.7493</b> | 2814.9787      |
|          | AVERAGE  | 2543.0511 | 2633.4501  | 2595.5316  | <b>2494.2599</b> | 2778.6347      |
|          | BEST     | 2466.0074 | 2578.9341  | 2490.6946  | <b>2451.5708</b> | 2732.7213      |
|          | STD      | 37.6763   | 33.4743    | 66.8247    | 28.2386          | <b>18.8129</b> |
| F22      | WORST    | 9619.8435 | 15179.0363 | 10283.8217 | <b>8869.4353</b> | 17037.6376     |
|          | AVERAGE  | 9118.3631 | 14213.5408 | 8926.6873  | <b>8086.5154</b> | 16457.9219     |
|          | BEST     | 8414.9297 | 12930.7286 | 7510.9214  | 6936.4017        | 15518.4557     |
|          | STD      | 370.8804  | 514.9083   | 696.7020   | 514.4964         | 352.5750       |
| F23      | WORST    | 3039.5937 | 3088.0510  | 3822.1653  | <b>2977.8101</b> | 3292.7711      |
|          | AVERAGE  | 2970.8573 | 3035.2232  | 3318.6493  | <b>2928.9920</b> | 3248.7304      |
|          | BEST     | 2897.9147 | 2958.0114  | 2987.0162  | <b>2860.0315</b> | 3199.6836      |
|          | STD      | 41.1864   | 36.9995    | 198.2687   | 35.6962          | <b>28.7382</b> |

|     |         |                  |                  |                  |                  |                 |
|-----|---------|------------------|------------------|------------------|------------------|-----------------|
| F24 | WORST   | <b>3268.5611</b> | 3383.0084        | 3493.8157        | 3369.3369        | 3432.0372       |
|     | AVERAGE | 3174.6077        | 3318.5480        | 3302.6392        | <b>3119.0259</b> | 3398.1812       |
|     | BEST    | 3079.8677        | 3261.6965        | 3117.0315        | <b>3002.6072</b> | 3357.7378       |
|     | STD     | 46.7549          | 39.5512          | 79.9521          | 103.6092         | <b>22.0915</b>  |
| F25 | WORST   | 3028.5296        | <b>2931.3426</b> | 3088.9254        | 4028.6052        | 5108.2984       |
|     | AVERAGE | 2990.9150        | <b>2931.2802</b> | 3032.4856        | 3423.3596        | 4520.1769       |
|     | BEST    | 2942.4561        | <b>2931.2513</b> | 2964.2828        | 3057.3814        | 3948.9707       |
|     | STD     | 30.1100          | <b>0.0266</b>    | 39.7740          | 203.4529         | 286.1856        |
| F26 | WORST   | 7264.4260        | <b>7141.9486</b> | 9745.2836        | 7437.6028        | 9756.6739       |
|     | AVERAGE | 6139.0968        | 6354.9705        | <b>5539.6906</b> | 6048.5914        | 9099.7192       |
|     | BEST    | 2900.0009        | 5725.8034        | <b>2900.0001</b> | 5183.9332        | 8722.1477       |
|     | STD     | 1197.4310        | 413.9506         | 2839.7968        | 562.5225         | <b>282.3465</b> |
| F27 | WORST   | 3323.9668        | <b>3200.0119</b> | 4460.9491        | 3715.5984        | 4030.2077       |
|     | AVERAGE | 3257.8181        | <b>3200.0116</b> | 3919.7399        | 3538.1554        | 3919.5674       |
|     | BEST    | 3219.4419        | <b>3200.0113</b> | 3560.9191        | 3372.2664        | 3812.1263       |
|     | STD     | 28.6174          | <b>0.0001</b>    | 214.9326         | 79.2397          | 65.7020         |
| F28 | WORST   | 3304.4025        | <b>3300.0118</b> | 3883.8606        | 5565.3802        | 6186.7374       |
|     | AVERAGE | 3294.9490        | <b>3300.0117</b> | 3335.7300        | 4101.5299        | 5275.7331       |
|     | BEST    | 3257.3531        | <b>3300.0113</b> | 3261.9001        | 3545.0578        | 4367.7996       |
|     | STD     | 16.0938          | <b>0.0001</b>    | 131.8416         | 492.2318         | 480.3973        |
| F29 | WORST   | <b>4418.4208</b> | 5468.6628        | 5420.2673        | 4862.4720        | 6364.7579       |
|     | AVERAGE | <b>4056.7505</b> | 4615.2234        | 4926.3088        | 4320.5553        | 5729.5187       |
|     | BEST    | <b>3644.1795</b> | 4020.0167        | 4276.1500        | 3788.7691        | 4880.4469       |
|     | STD     | <b>172.0778</b>  | 478.2961         | 344.0108         | 301.2080         | 332.1567        |
| F30 | WORST   | <b>1.89E+06</b>  | 2.39E+07         | 3.53E+06         | 1.49E+08         | 4.48E+07        |
|     | AVERAGE | <b>1.03E+06</b>  | 6.57E+06         | 2.38E+06         | 7.63E+07         | 2.48E+07        |
|     | BEST    | 7.03E+05         | <b>8.91E+04</b>  | 1.37E+06         | 3.70E+07         | 1.42E+07        |
|     | STD     | <b>3.13E+05</b>  | 7.35E+06         | 5.06E+05         | 3.29E+07         | 8.15E+06        |

## Supplementary Material F

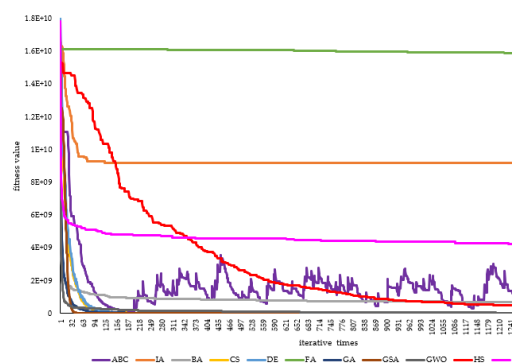

**Figure S1.** The fitness change curves on F1 under D=10 for parameters I of compared NIOAs

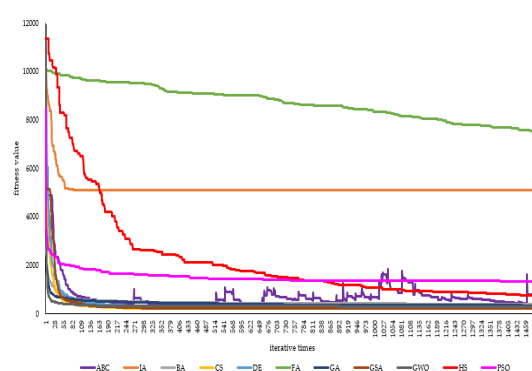

**Figure S2.** The fitness change curves on F2 under D=10 for parameters I of compared NIOAs

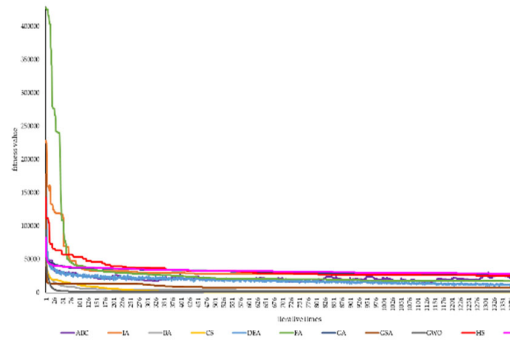

**Figure S3.** The fitness change curves on F3 under D=10 for parameters I of compared NIOAs

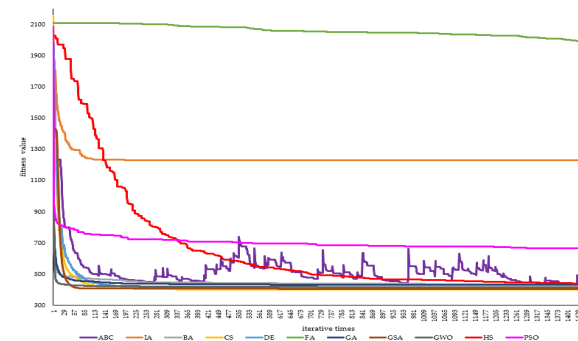

**Figure S4.** The fitness change curves on F4 under D=10 for parameters I of compared NIOAs

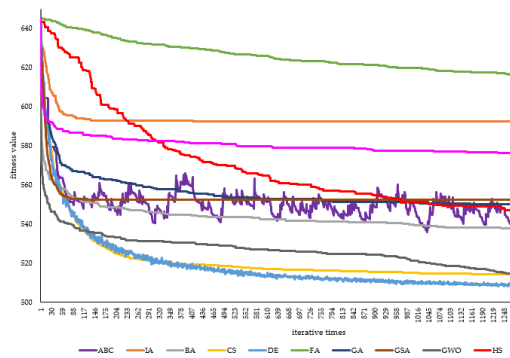

**Figure S5.** The fitness change curves on F5 under D=10 for parameters I of compared NIOAs

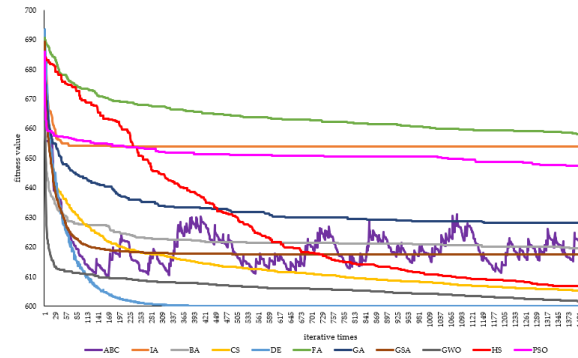

**Figure S6.** The fitness change curves on F6 under D=10 for parameters I of compared NIOAs

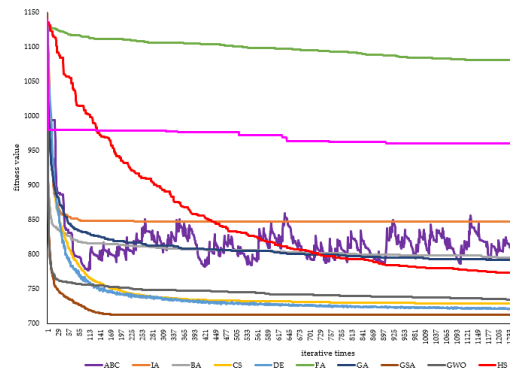

**Figure S7.** The fitness change curves on F7 under D=10 for parameters I of compared NIOAs

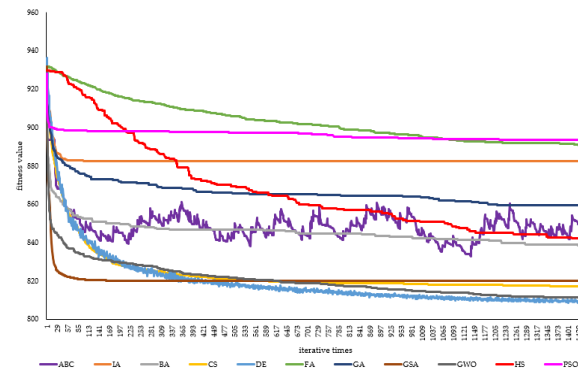

**Figure S8.** The fitness change curves on F8 under D=10 for parameters I of compared NIOAs

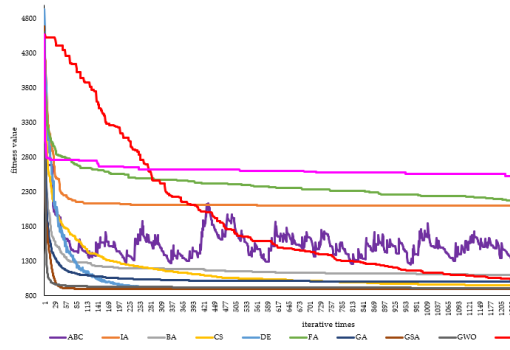

**Figure S9.** The fitness change curves on F9 under D=10 for parameters I of compared NIOAs

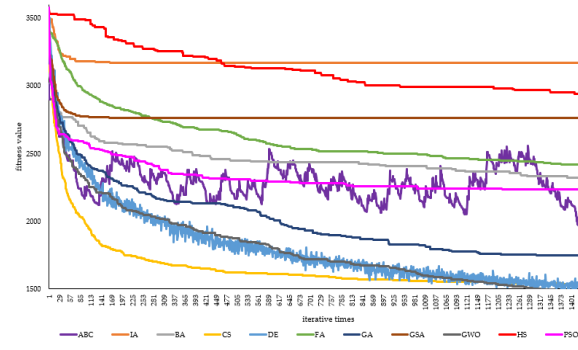

**Figure S10.** The fitness change curves on F10 under D=10 for parameters I of compared NIOAs

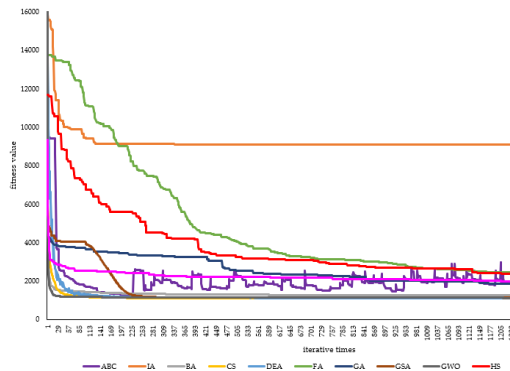

**Figure S11.** The fitness change curves on F11 under D=10 for parameters I of compared NIOAs

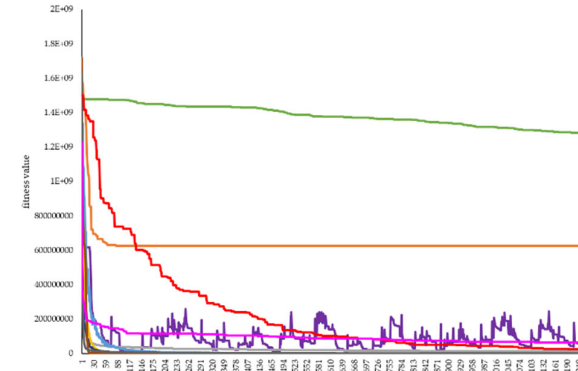

**Figure S12.** The fitness change curves on F12 under D=10 for parameters I of compared NIOAs

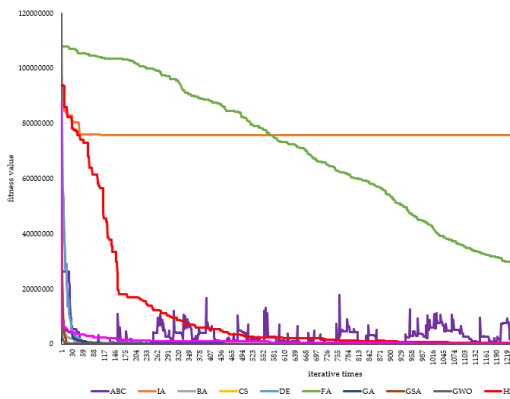

**Figure S13.** The fitness change curves on F13 under D=10 for parameters I of compared NIOAs

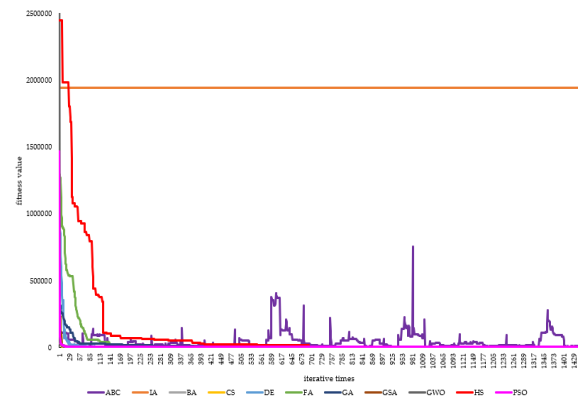

**Figure S14.** The fitness change curves on F14 under D=10 for parameters I of compared NIOAs

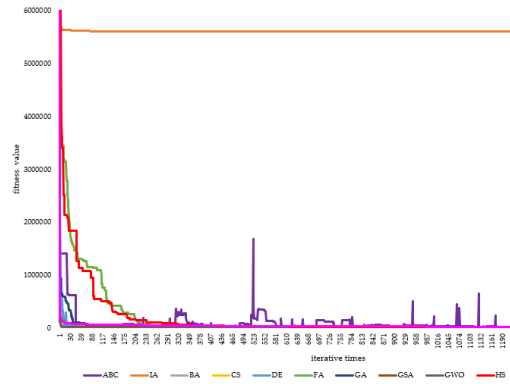

**Figure S15.** The fitness change curves on F15 under D=10 for parameters I of compared NIOAs

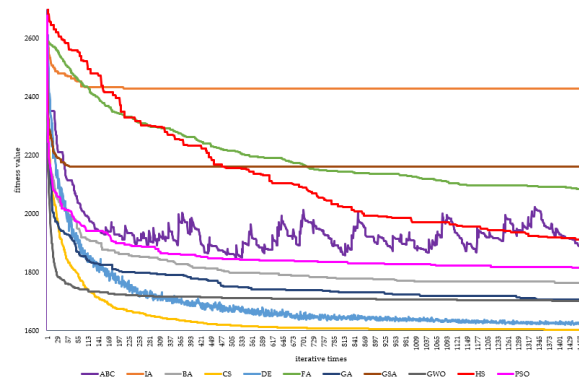

**Figure S16.** The fitness change curves on F16 under D=10 for parameters I of compared NIOAs

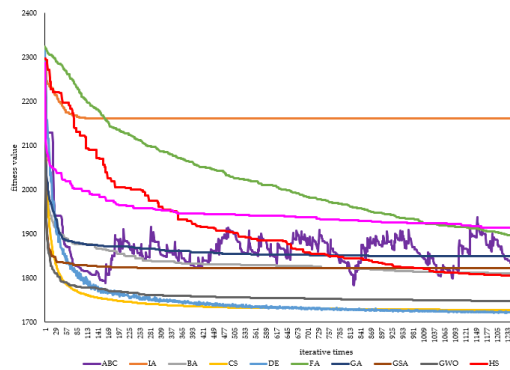

**Figure S17.** The fitness change curves on F17 under D=10 for parameters I of compared NIOAs

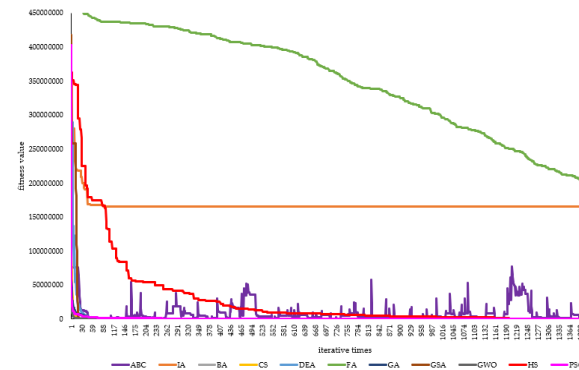

**Figure S18.** The fitness change curves on F18 under D=10 for parameters I of compared NIOAs

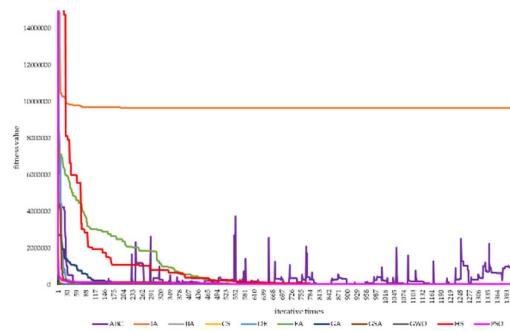

**Figure S19.** The fitness change curves on F19 under D=10 for parameters I of compared NIOAs

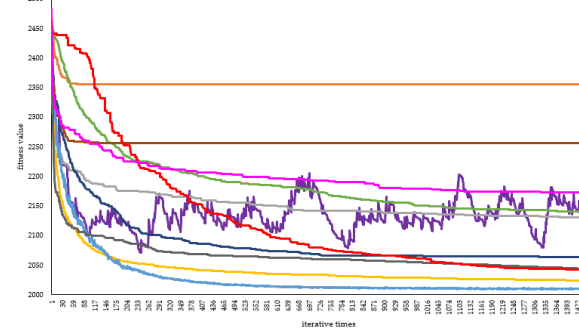

**Figure S20.** The fitness change curves on F20 under D=10 for parameters I of compared NIOAs



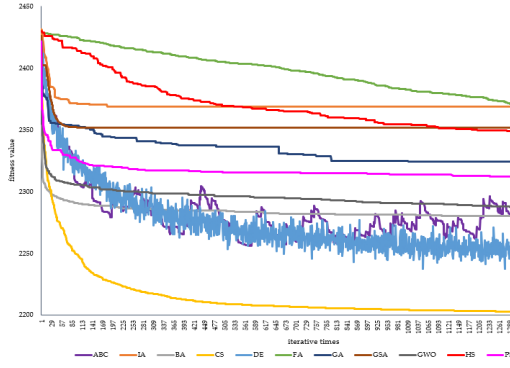

**Figure S21.** The fitness change curves on F21 under D=10 for parameters I of compared NIOAs

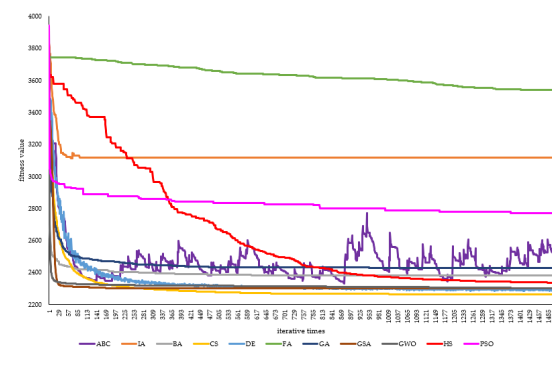

**Figure S22.** The fitness change curves on F22 under D=10 for parameters I of compared NIOAs

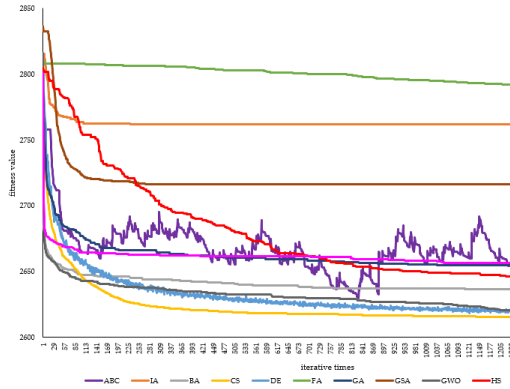

**Figure S23.** The fitness change curves on F23 under D=10 for parameters I of compared NIOAs

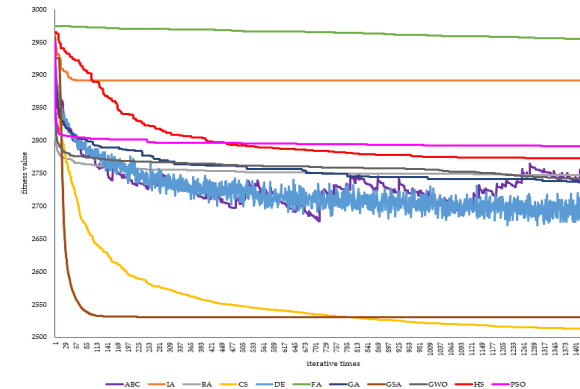

**Figure S24.** The fitness change curves on F24 under D=10 for parameters I of compared NIOAs

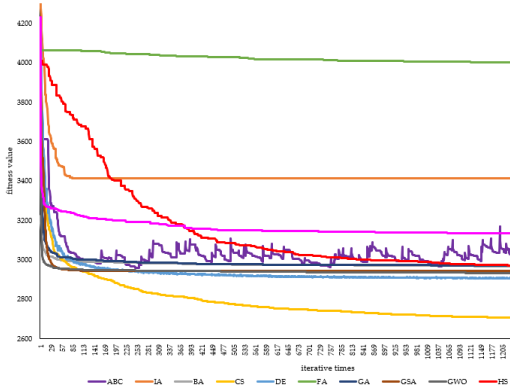

**Figure S25.** The fitness change curves on F25 under D=10 for parameters I of compared NIOAs

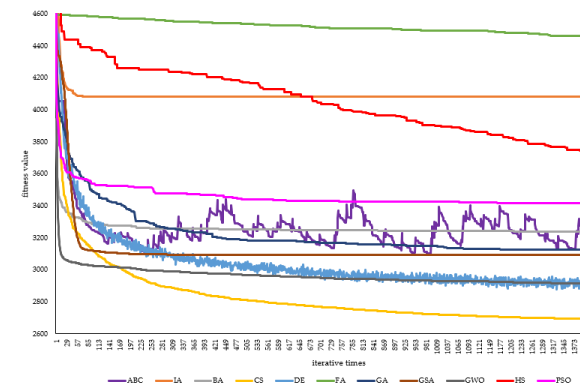

**Figure S26.** The fitness change curves on F26 under D=10 for parameters I of compared NIOAs

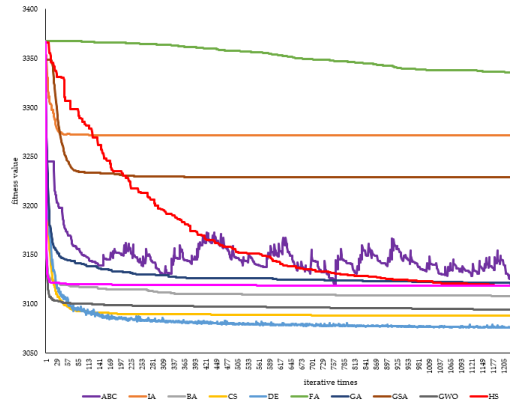

**Figure S27.** The fitness change curves on F27 under D=10 for parameters I of compared NIOAs

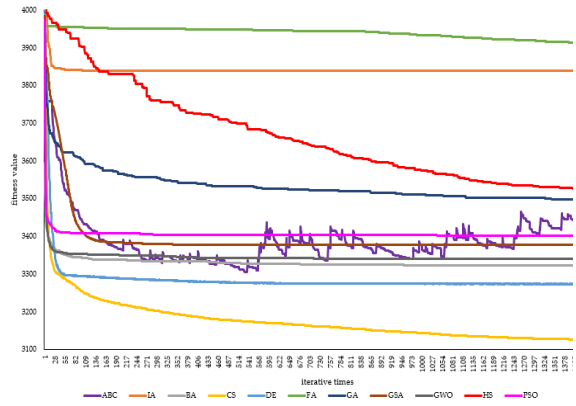

**Figure S28.** The fitness change curves on F28 under D=10 for parameters I of compared NIOAs

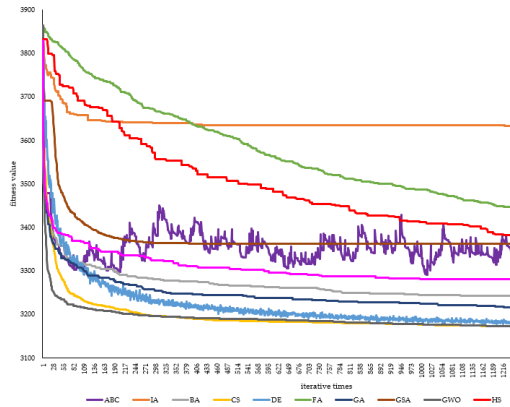

**Figure S29.** The fitness change curves on F29 under D=10 for parameters I of compared NIOAs

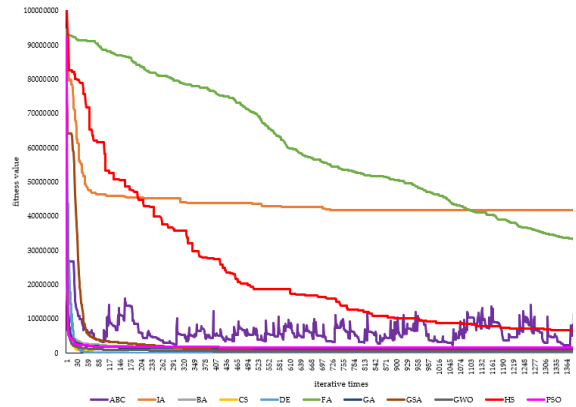

**Figure S30.** The fitness change curves on F30 under D=10 for parameters I of compared NIOAs

## Supplementary Material G

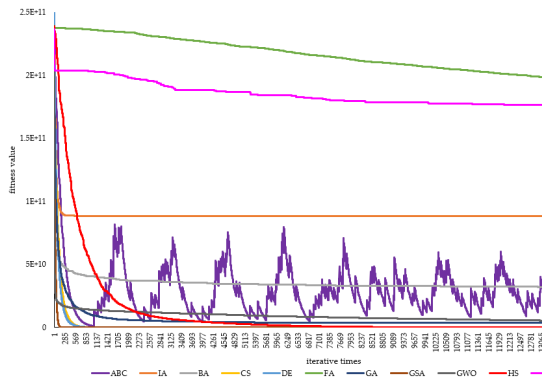

**Figure S31.** The fitness change curves on F1 under D=50 for parameters I of compared NIOAs

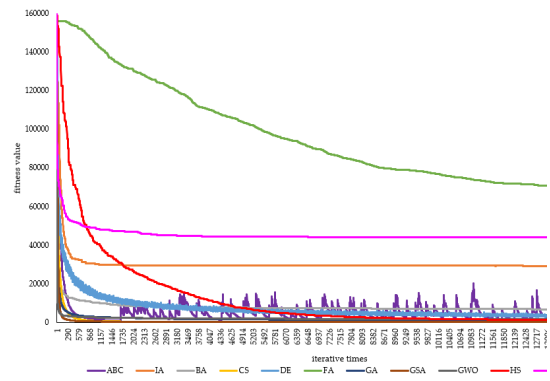

**Figure S32.** The fitness change curves on F2 under D=50 for parameters I of compared NIOAs

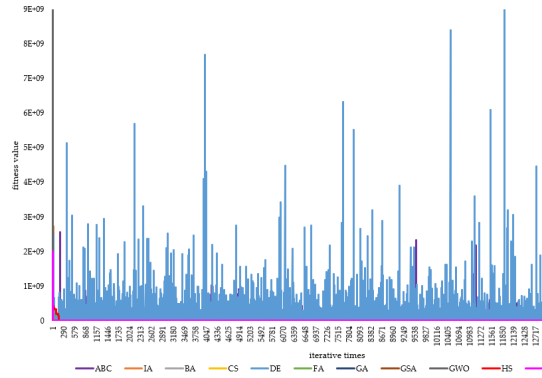

**Figure S33.** The fitness change curves on F3 under D=50 for parameters I of compared NIOAs

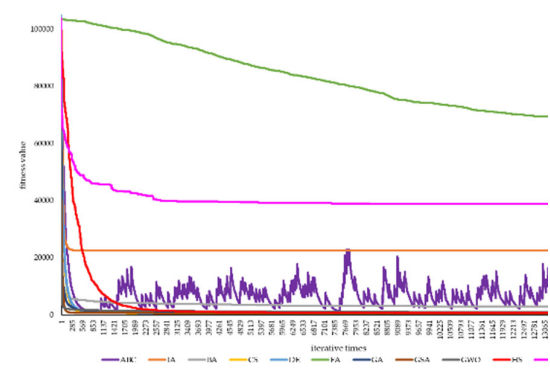

**Figure S34.** The fitness change curves on F4 under D=50 for parameters I of compared NIOAs

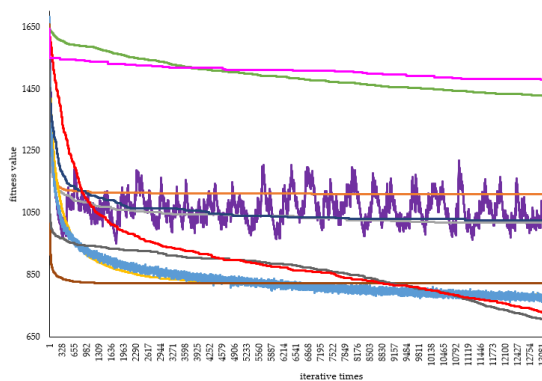

**Figure S35.** The fitness change curves on F5 under D=50 for parameters I of compared NIOAs

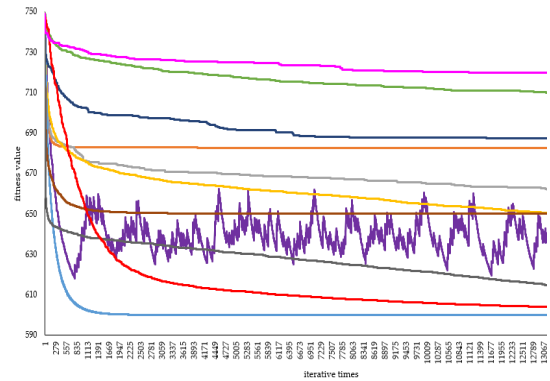

**Figure S36.** The fitness change curves on F6 under D=50 for parameters I of compared NIOAs

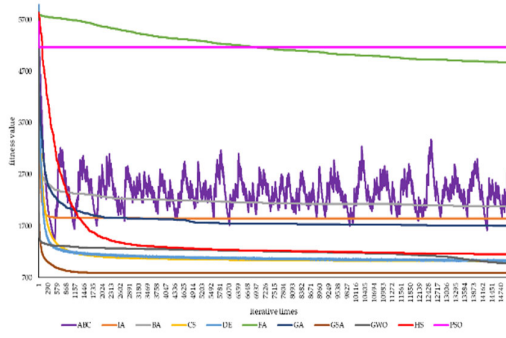

**Figure S37.** The fitness change curves on F7 under D=50 for parameters I of compared NIOAs

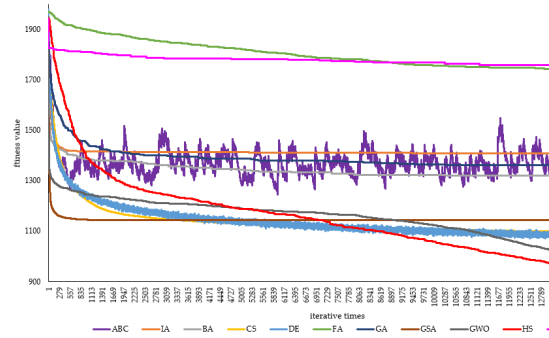

**Figure S38.** The fitness change curves on F8 under D=50 for parameters I of compared NIOAs

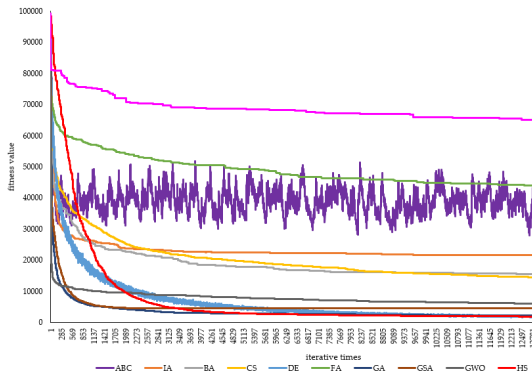

**Figure S39.** The fitness change curves on F9 under D=50 for parameters I of compared NIOAs

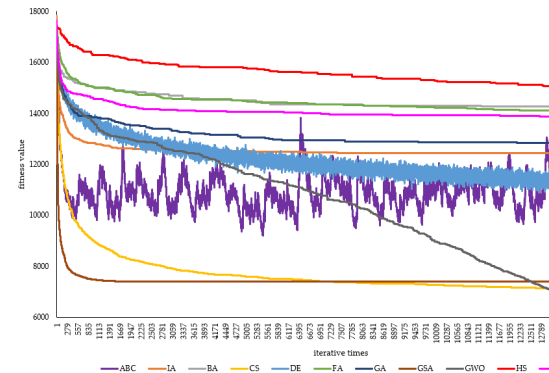

**Figure S40.** The fitness change curves on F10 under D=50 for parameters I of compared NIOAs

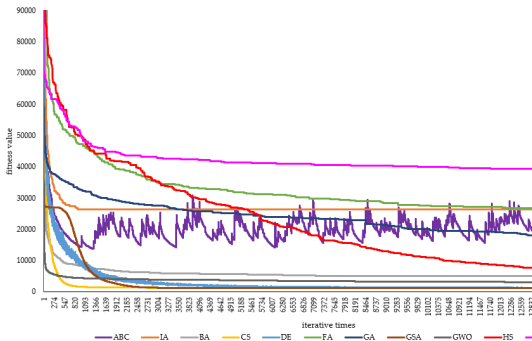

**Figure S41.** The fitness change curves on F11 under D=50 for parameters I of compared NIOAs

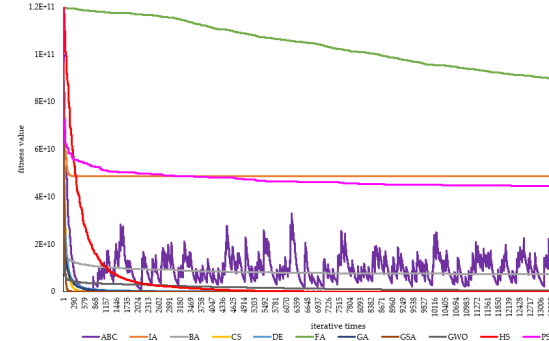

**Figure S42.** The fitness change curves on F12 under D=50 for parameters I of compared NIOAs

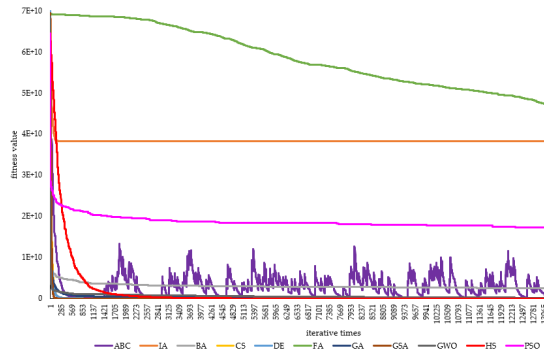

**Figure S43.** The fitness change curves on F13 under D=50 for parameters I of compared NIOAs

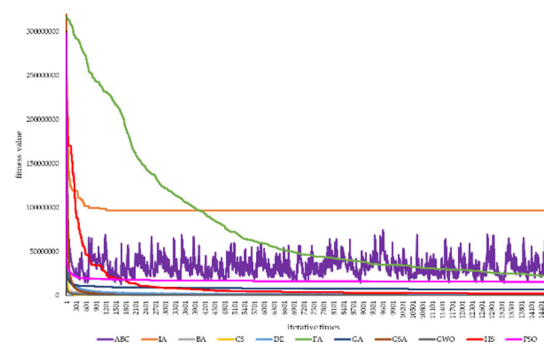

**Figure S44.** The fitness change curves on F14 under D=50 for parameters I of compared NIOAs

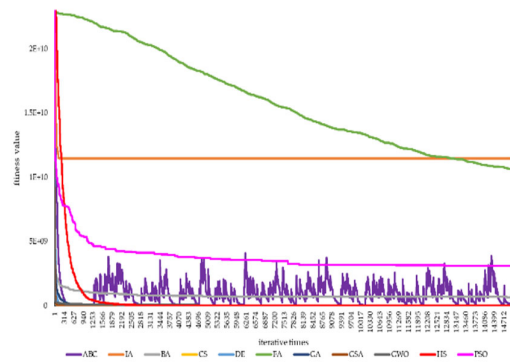

**Figure S45.** The fitness change curves on F15 under D=50 for parameters I of compared NIOAs

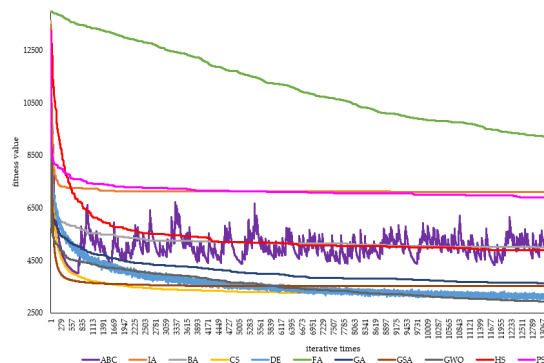

**Figure S46.** The fitness change curves on F16 under D=50 for parameters I of compared NIOAs

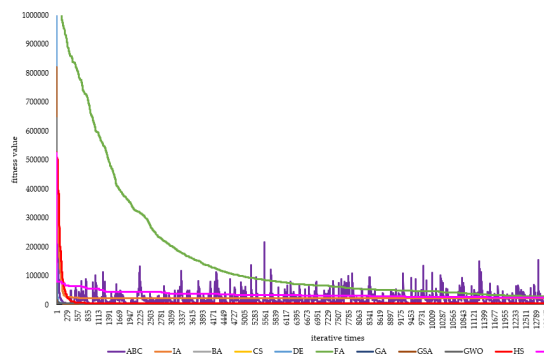

**Figure S47.** The fitness change curves on F17 under D=50 for parameters I of compared NIOAs

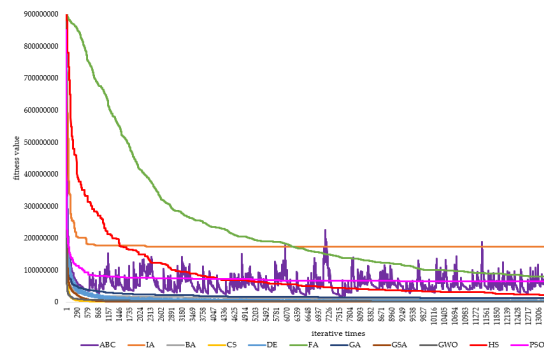

**Figure S48.** The fitness change curves on F18 under D=50 for parameters I of compared NIOAs

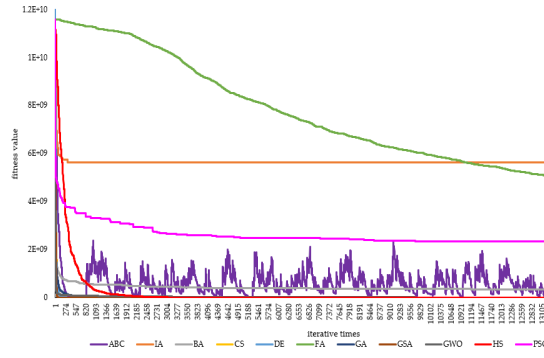

**Figure S49.** The fitness change curves on F19 under D=50 for parameters I of compared NIOAs

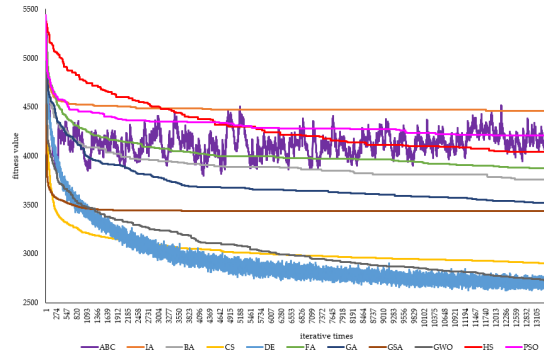

**Figure S50.** The fitness change curves on F20 under D=50 for parameters I of compared NIOAs

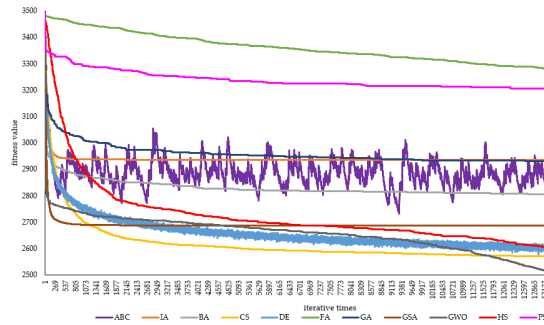

**Figure S51.** The fitness change curves on F21 under D=50 for parameters I of compared NIOAs

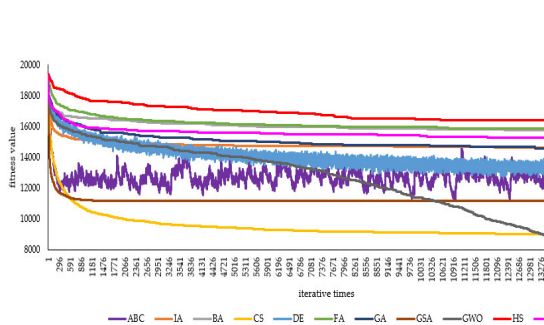

**Figure S52.** The fitness change curves on F22 under D=50 for parameters I of compared NIOAs

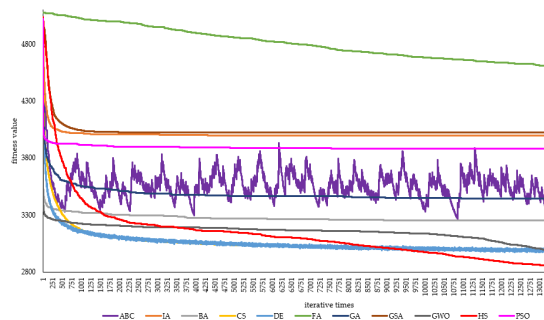

**Figure S53.** The fitness change curves on F23 under D=50 for parameters I of compared NIOAs

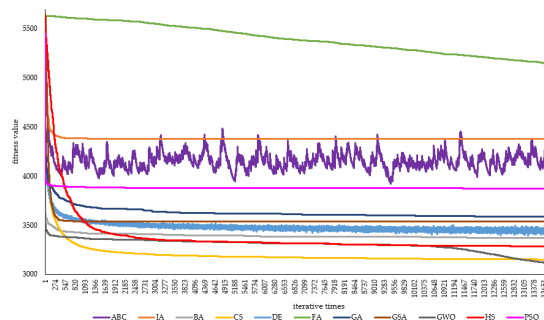

**Figure S54.** The fitness change curves on F24 under D=50 for parameters I of compared NIOAs

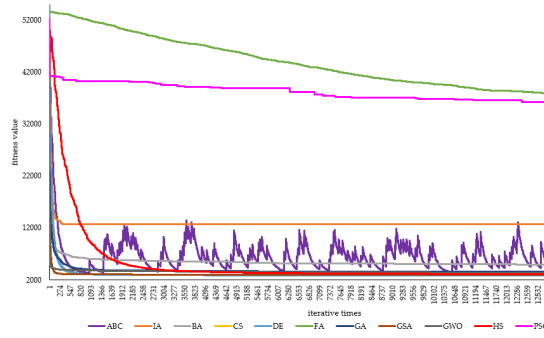

**Figure S55.** The fitness change curves on F25 under D=50 for parameters I of compared NIOAs

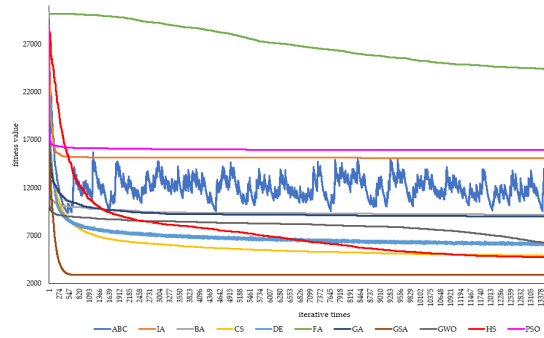

**Figure S56.** The fitness change curves on F26 under D=50 for parameters I of compared NIOAs

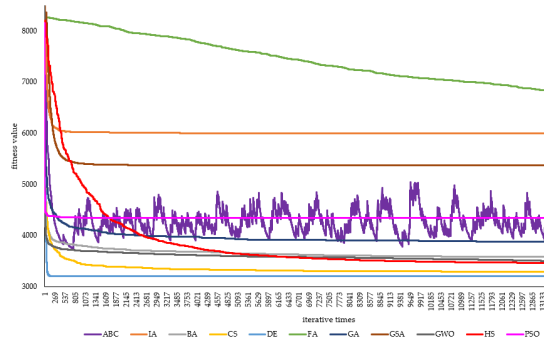

**Figure S57.** The fitness change curves on F27 under D=50 for parameters I of compared NIOAs

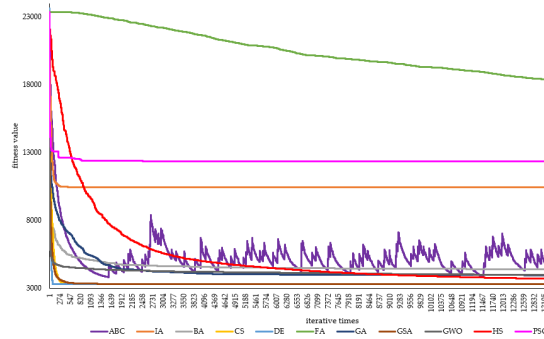

**Figure S58.** The fitness change curves on F28 under D=50 for parameters I of compared NIOAs

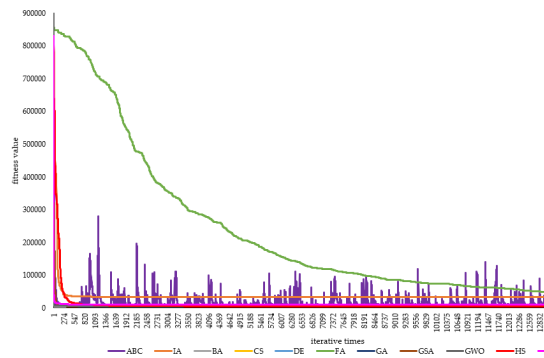

**Figure S59.** The fitness change curves on F29 under D=50 for parameters I of compared NIOAs

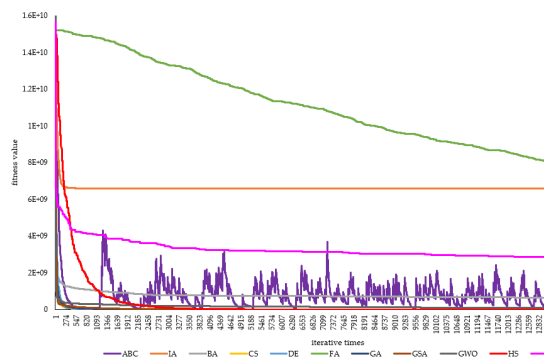

**Figure S60.** The fitness change curves on F30 under D=50 for parameters I of compared NIOAs

## Supplementary Material H

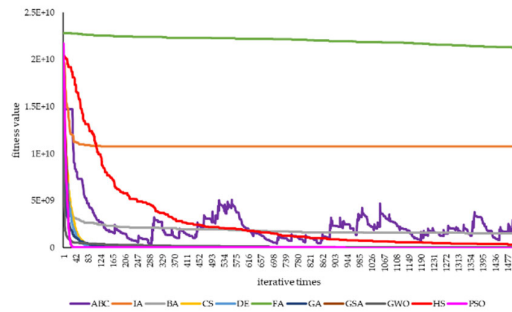

**Figure S61.** The fitness change curves on F1 under D=10 for parameters II of compared NIOAs

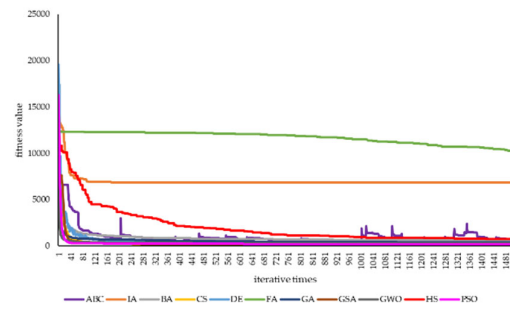

**Figure S62.** The fitness change curves on F2 under D=10 for parameters II of compared NIOAs

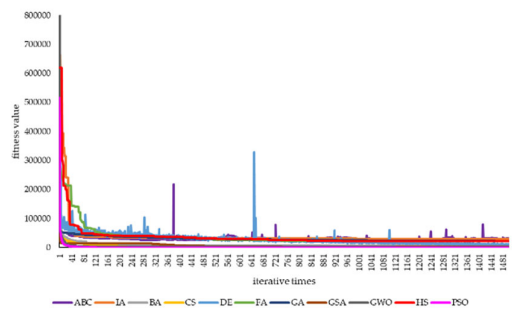

**Figure S63.** The fitness change curves on F3 under D=10 for parameters II of compared NIOAs

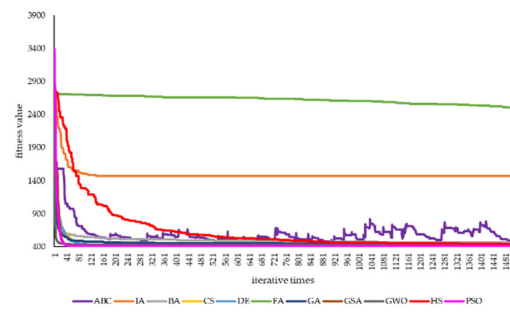

**Figure S64.** The fitness change curves on F4 under D=10 for parameters II of compared NIOAs

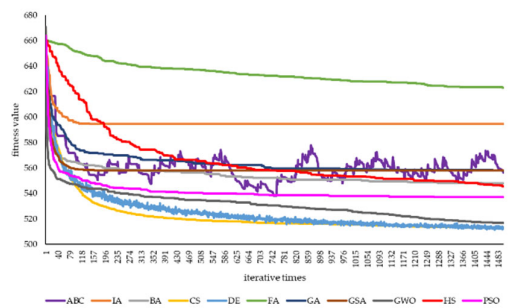

**Figure S65.** The fitness change curves on F5 under D=10 for parameters II of compared NIOAs

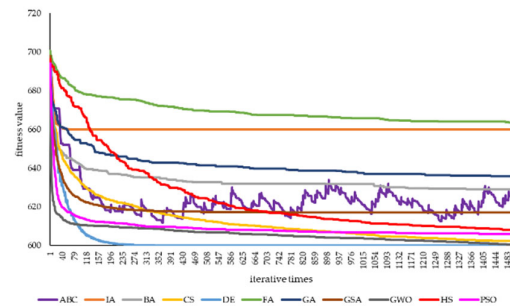

**Figure S66.** The fitness change curves on F6 under D=10 for parameters II of compared NIOAs



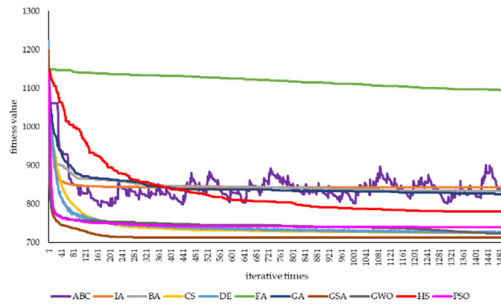

**Figure S67.** The fitness change curves on F7 under D=10 for parameters II of compared NIOAs

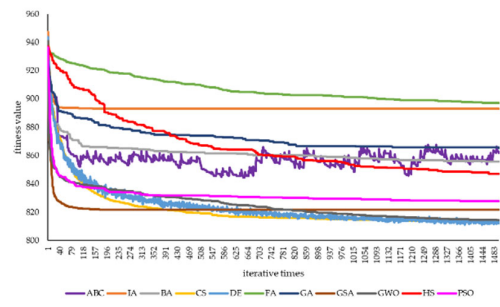

**Figure S68.** The fitness change curves on F8 under D=10 for parameters II of compared NIOAs

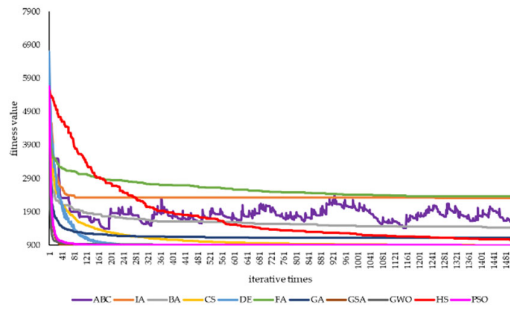

**Figure S69.** The fitness change curves on F9 under D=10 for parameters II of compared NIOAs

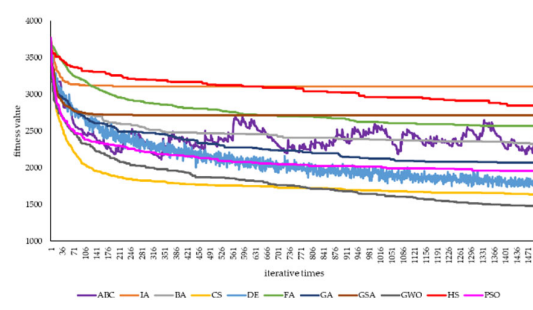

**Figure S70.** The fitness change curves on F10 under D=10 for parameters II of compared NIOAs

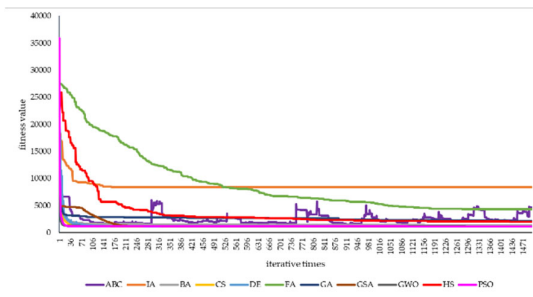

**Figure S71.** The fitness change curves on F11 under D=10 for parameters II of compared NIOAs

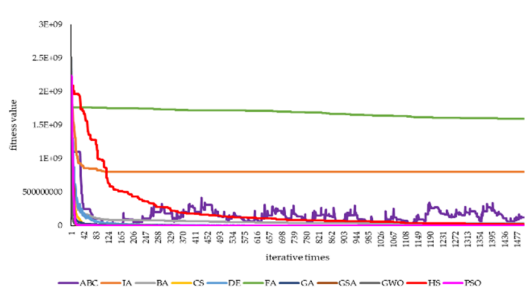

**Figure S72.** The fitness change curves on F12 under D=10 for parameters II of compared NIOAs

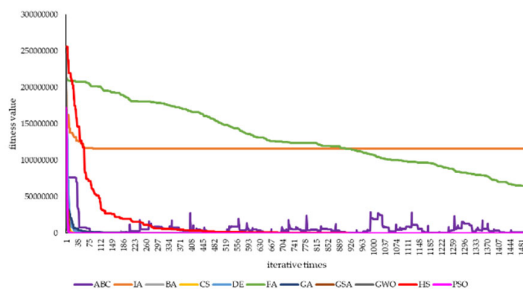

**Figure S73.** The fitness change curves on F13 under D=10 for parameters II of compared NIOAs

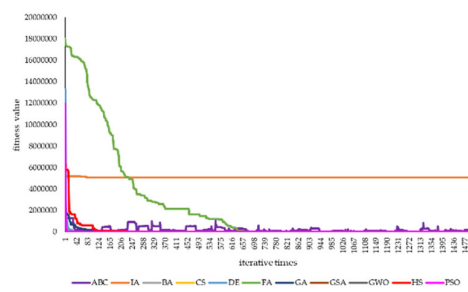

**Figure S74.** The fitness change curves on F14 under D=10 for parameters II of compared NIOAs

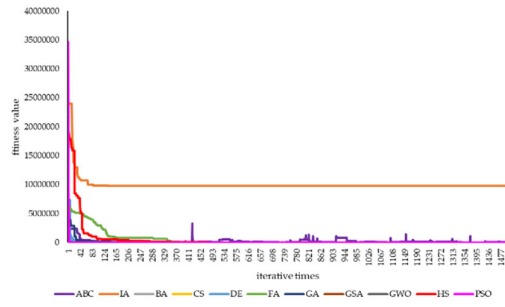

**Figure S75.** The fitness change curves on F15 under D=10 for parameters II of compared NIOAs

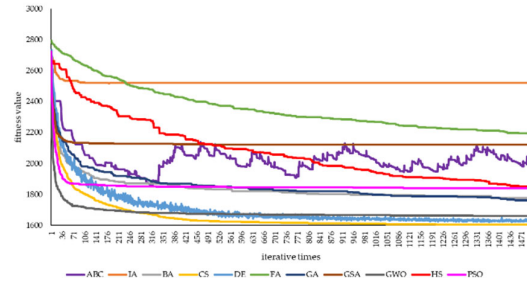

**Figure S76.** The fitness change curves on F16 under D=10 for parameters II of compared NIOAs

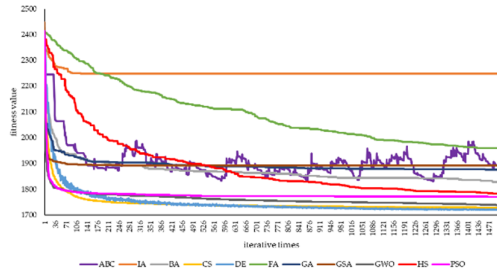

**Figure S77.** The fitness change curves on F17 under D=10 for parameters II of compared NIOAs

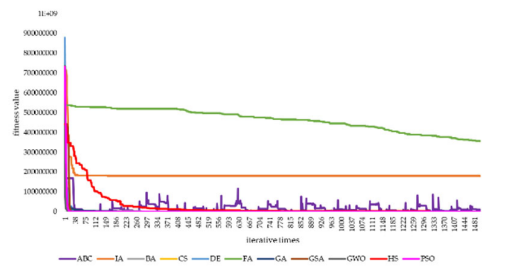

**Figure S78.** The fitness change curves on F18 under D=10 for parameters II of compared NIOAs

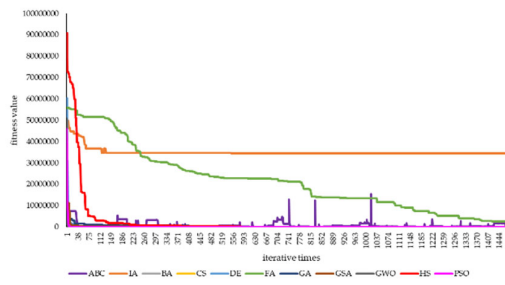

**Figure S79.** The fitness change curves on F19 under D=10 for parameters II of compared NIOAs

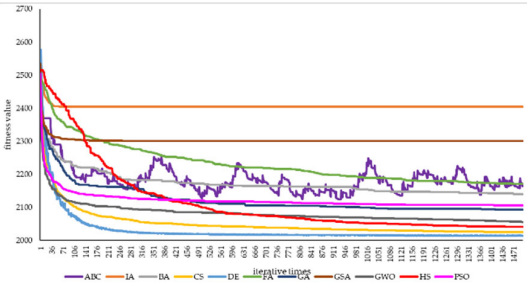

**Figure S80.** The fitness change curves on F20 under D=10 for parameters II of compared NIOAs

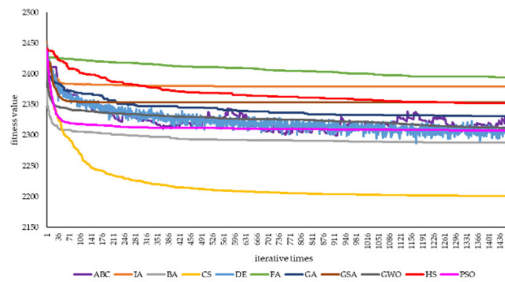

**Figure S81.** The fitness change curves on F21 under D=10 for parameters II of compared NIOAs

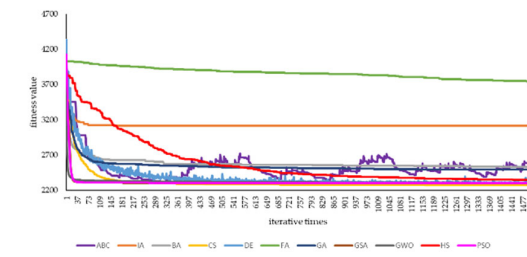

**Figure S82.** The fitness change curves on F22 under D=10 for parameters II of compared NIOAs

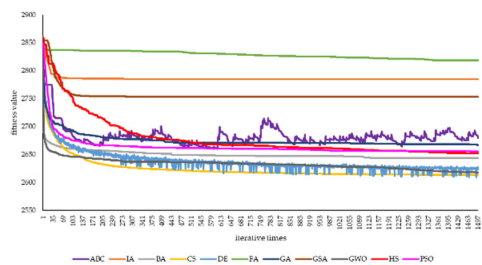

**Figure S83.** The fitness change curves on F23 under D=10 for parameters II of compared NIOAs

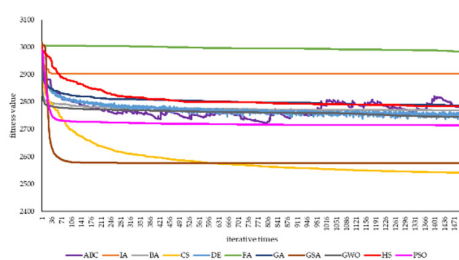

**Figure S84.** The fitness change curves on F24 under D=10 for parameters II of compared NIOAs

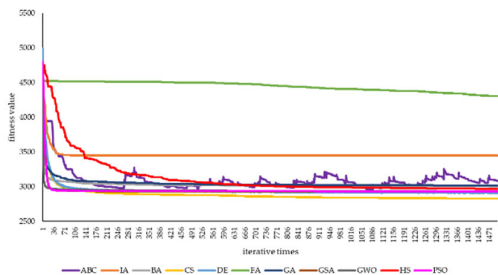

**Figure S85.** The fitness change curves on F25 under D=10 for parameters II of compared NIOAs

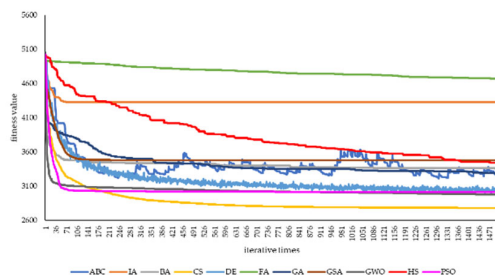

**Figure S86.** The fitness change curves on F26 under D=10 for parameters II of compared NIOAs

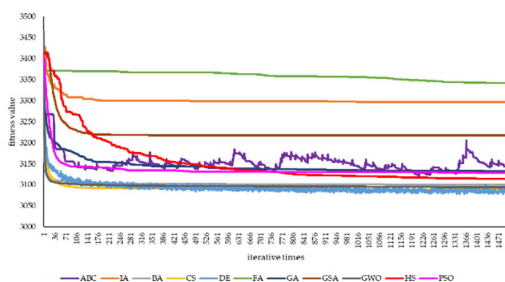

**Figure S87.** The fitness change curves on F27 under D=10 for parameters II of compared NIOAs

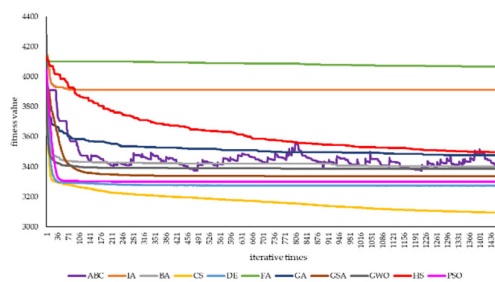

**Figure S88.** The fitness change curves on F28 under D=10 for parameters II of compared NIOAs

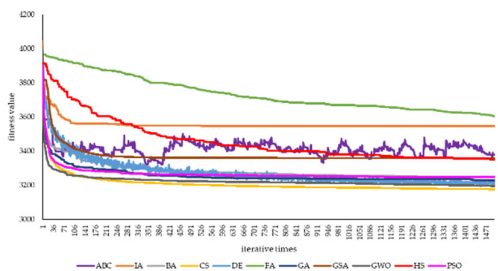

**Figure S89.** The fitness change curves on F29 under D=10 for parameters II of compared NIOAs

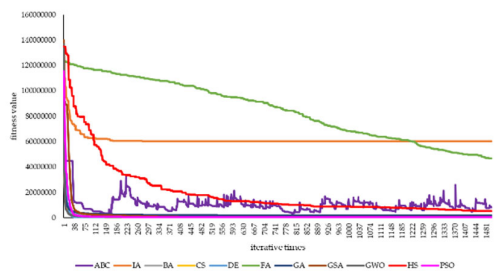

**Figure S90.** The fitness change curves on F30 under D=10 for parameters II of compared NIOAs

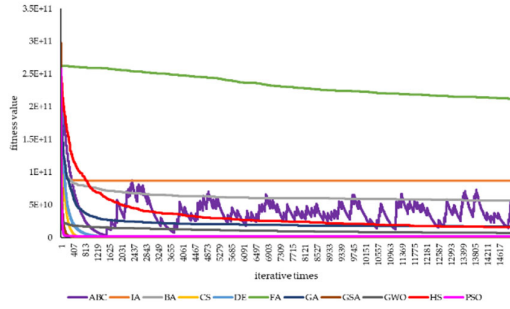

**Figure S91.** The fitness change curves on F1 under D=50 for parameters II of NIOAs

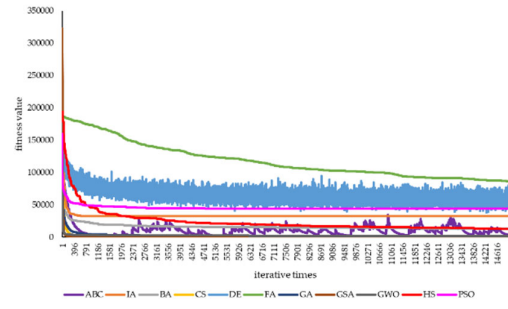

**Figure S92.** The fitness change curves on F2 under D=50 for parameters II of NIOAs

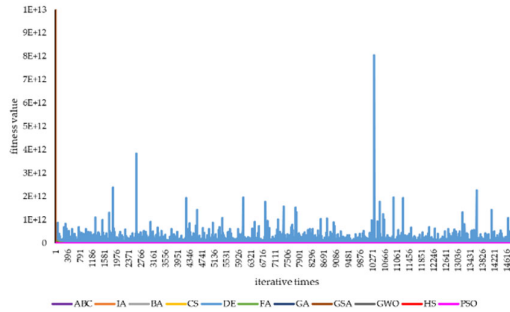

**Figure S93.** The fitness change curves on F3 under D=50 for parameters II of compared NIOAs

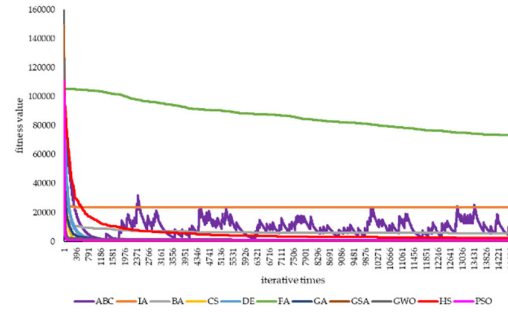

**Figure S94.** The fitness change curves on F4 under D=50 for parameters II of compared NIOAs

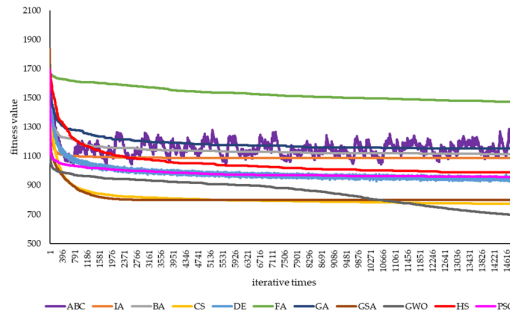

**Figure S95.** The fitness change curves on F5 under D=50 for parameters II of compared NIOAs

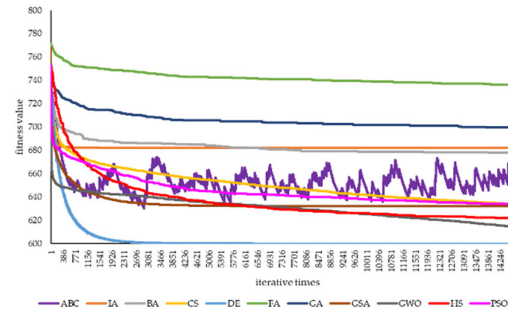

**Figure S96.** The fitness change curves on F6 under D=50 for parameters II of compared NIOAs

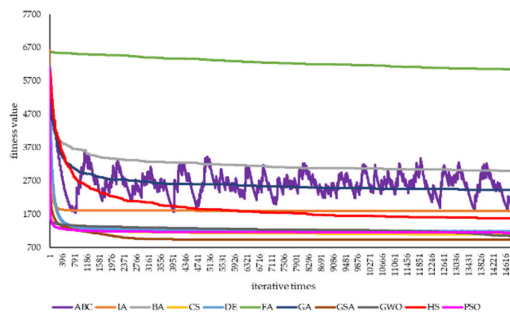

**Figure S97.** The fitness change curves on F7 under D=50 for parameters II of compared NIOAs

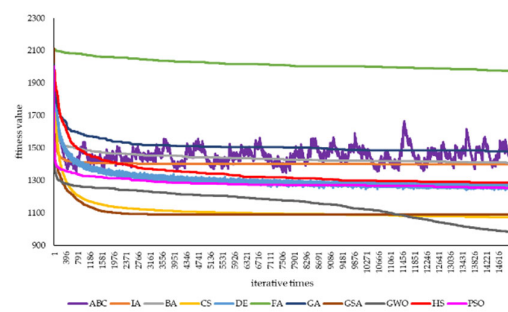

**Figure S98.** The fitness change curves on F8 under D=50 for parameters II of compared NIOAs

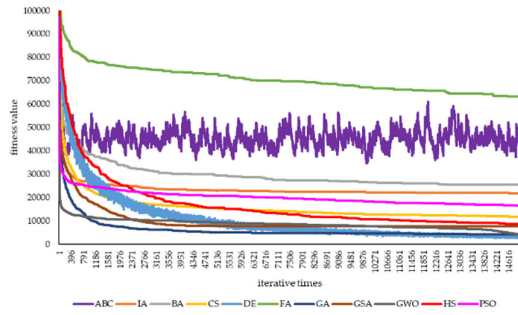

**Figure S99.** The fitness change curves on F9 under D=50 for parameters II of compared NIOAs

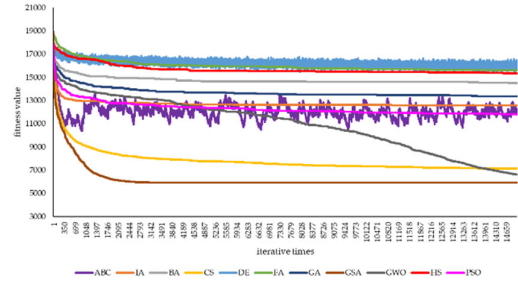

**Figure S100.** The fitness change curves on F10 under D=50 for parameters II of compared NIOAs

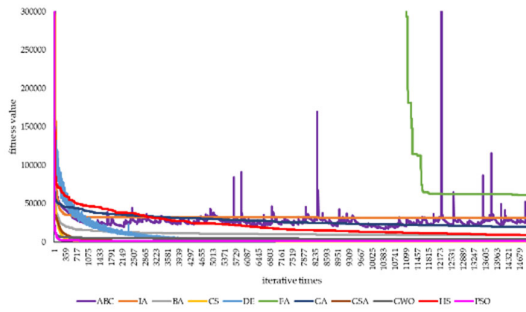

**Figure S101.** The fitness change curves on F11 under D=50 for parameters II of compared NIOAs

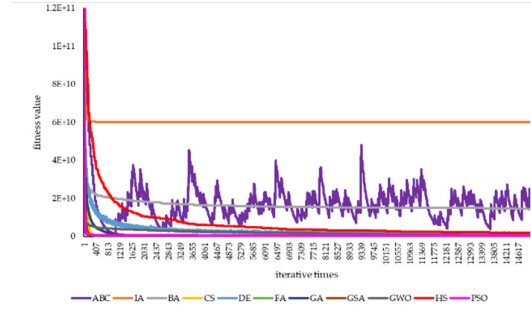

**Figure S102.** The fitness change curves on F12 under D=50 for parameters II of compared NIOAs

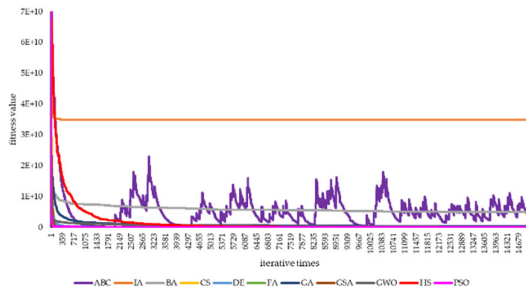

**Figure S103.** The fitness change curves on F13 under D=50 for parameters II of compared NIOAs

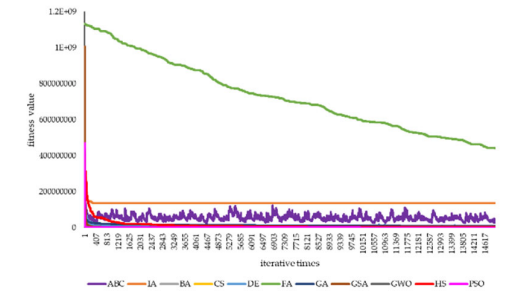

**Figure S104.** The fitness change curves on F14 under D=50 for parameters II of compared NIOAs

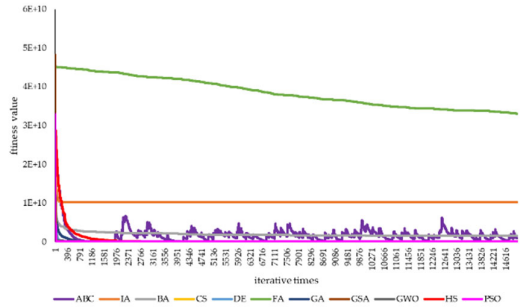

**Figure S105.** The fitness change curves on F15 under D=50 for parameters II of compared NIOAs

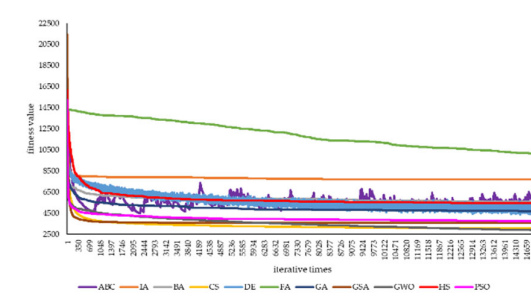

**Figure S106.** The fitness change curves on F16 under D=50 for parameters II of compared NIOAs



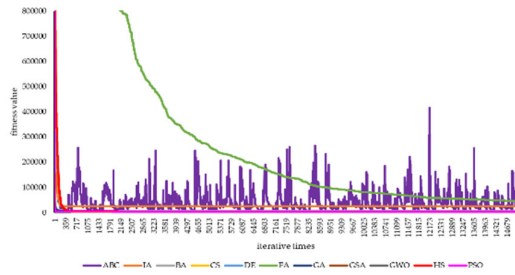

**Figure S107.** The fitness change curves on F17 under D=50 for parameters II of compared NIOAs

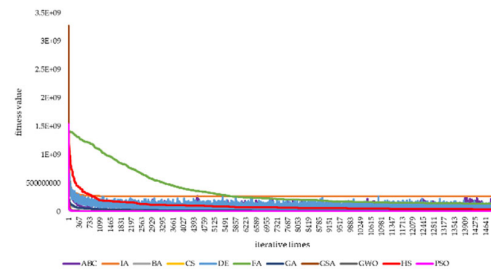

**Figure S108.** The fitness change curves on F18 under D=50 for parameters II of compared NIOAs

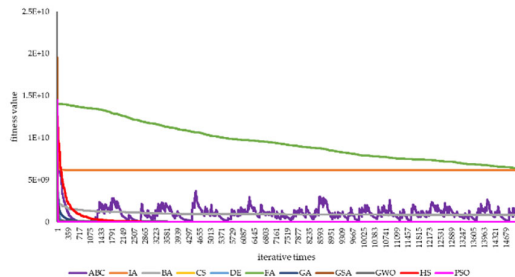

**Figure S109.** The fitness change curves on F19 under D=50 for parameters II of compared NIOAs

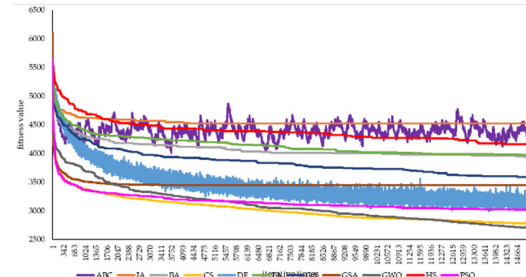

**Figure S110.** The fitness change curves on F20 under D=50 for parameters II of compared NIOAs

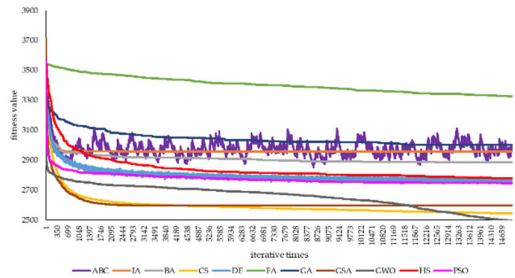

**Figure S111.** The fitness change curves on F21 under D=50 for parameters II of compared NIOAs

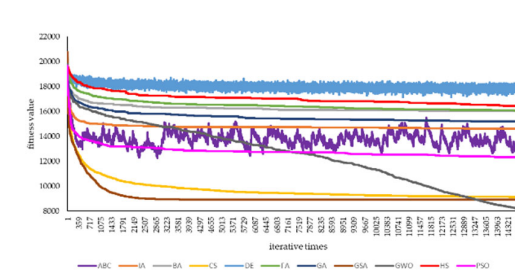

**Figure S112.** The fitness change curves on F22 under D=50 for parameters II of compared NIOAs

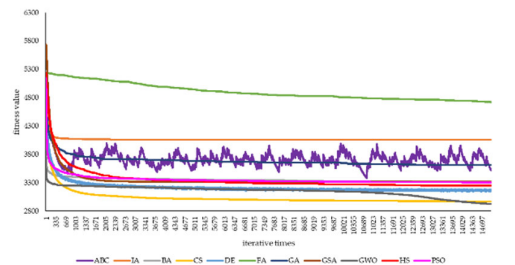

**Figure S113.** The fitness change curves on F23 under D=50 for parameters II of compared NIOAs

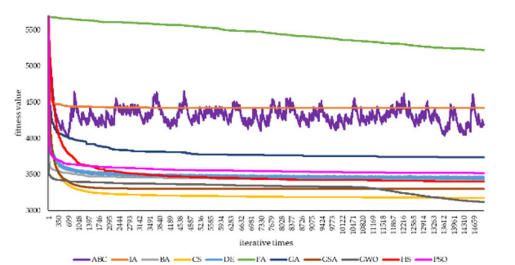

**Figure S114.** The fitness change curves on F24 under D=50 for parameters II of compared NIOAs

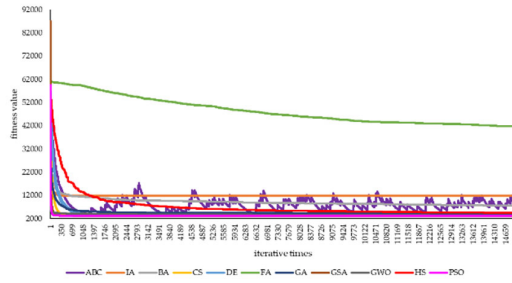

**Figure S115.** The fitness change curves on F25 under D=50 for parameters II of compared NIOAs

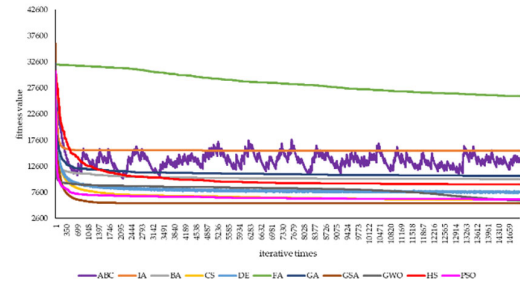

**Figure S116.** The fitness change curves on F26 under D=50 for parameters II of compared NIOAs

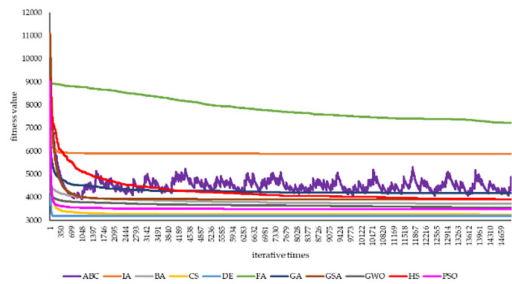

**Figure S117.** The fitness change curves on F27 under D=50 for parameters II of compared NIOAs

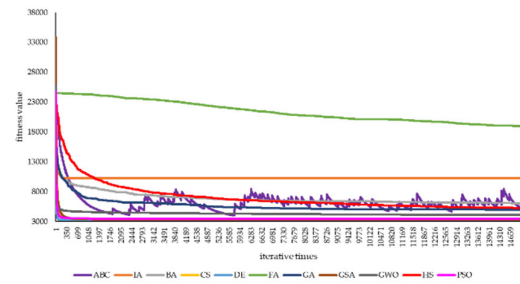

**Figure S118.** The fitness change curves on F28 under D=50 for parameters II of compared NIOAs

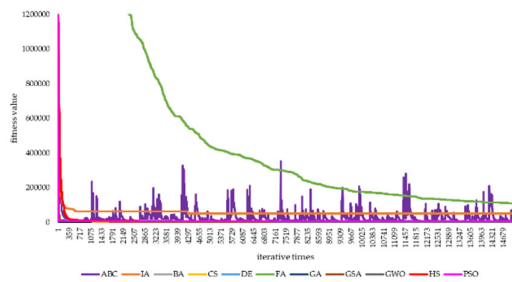

**Figure S119.** The fitness change curves on F29 under D=50 for parameters II of compared NIOAs

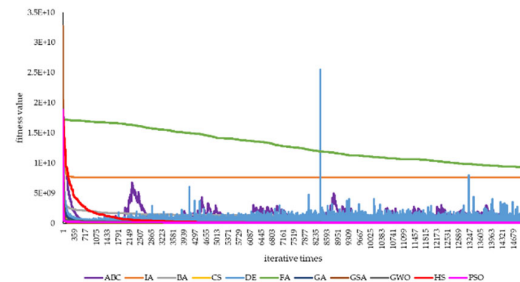

**Figure S120.** The fitness change curves on F30 under D=50 for parameters II of compared NIOAs

**Table S26.** The times of obtained the optimal results for 11 compared NIOAs

| <b>Criteria</b><br><b>NIOAs</b> |      | <b>Parameters I</b>                                                                                                                     |                                                                                                                               | <b>Parameters II</b>                                                                                                                    |                                                                                                                               |
|---------------------------------|------|-----------------------------------------------------------------------------------------------------------------------------------------|-------------------------------------------------------------------------------------------------------------------------------|-----------------------------------------------------------------------------------------------------------------------------------------|-------------------------------------------------------------------------------------------------------------------------------|
|                                 |      | <b>BEST</b>                                                                                                                             | <b>STD</b>                                                                                                                    | <b>BEST</b>                                                                                                                             | <b>STD</b>                                                                                                                    |
| DE                              | D=10 | 28 (F1, F2, F4, F5, F6, F7, F8, F9, F10, F11, F13, F14, F15, F16, F17, F18, F19, F20, F21, F22, F23, F24, F25, F26, F27, F28, F29, F30) | 23 (F2, F4, F5, F6, F7, F8, F9, F10, F11, F15, F16, F17, F19, F20, F21, F22, F23, F24, F25, F26, F27, F28, F29)               | 28 (F1, F2, F4, F5, F6, F7, F8, F9, F10, F11, F13, F14, F15, F16, F17, F18, F19, F20, F21, F22, F23, F24, F25, F26, F27, F28, F29, F30) | 23 (F2, F4, F5, F6, F7, F8, F9, F10, F11, F14, F15, F16, F17, F18, F19, F20, F21, F22, F23, F24, F25, F26, F27, F28, F29)     |
|                                 | D=50 | 7 (F4, F6, F9, F11, F20, F27, F28)                                                                                                      | 12 (F4, F6, F7, F8, F20, F23, F24, F25, F26, F27, F28, F29)                                                                   | 6 (F4, F6, F9, F11, F27, F28)                                                                                                           | 12 (F4, F6, F7, F8, F20, F23, F24, F25, F26, F27, F28, F29)                                                                   |
| CS                              | D=10 | 26 (F2, F3, F4, F5, F6, F7, F8, F9, F11, F13, F14, F15, F16, F17, F18, F19, F20, F21, F22, F23, F24, F25, F26, F27, F28, F29)           | 26 (F2, F3, F4, F5, F6, F7, F8, F9, F10, F11, F13, F14, F15, F16, F17, F19, F20, F21, F22, F23, F24, F25, F26, F27, F28, F29) | 27 (F1, F2, F3, F4, F5, F6, F7, F8, F9, F11, F13, F14, F15, F16, F17, F18, F19, F20, F21, F22, F23, F24, F25, F26, F27, F28, F29)       | 26 (F2, F3, F4, F5, F6, F7, F8, F9, F10, F11, F13, F14, F15, F16, F17, F19, F20, F21, F22, F23, F24, F25, F26, F27, F28, F29) |
|                                 | D=50 | 7 (F1, F2, F4, F6, F11, F19, F28)                                                                                                       | 13 (F2, F4, F6, F11, F16, F17, F20, F23, F24, F25, F27, F28, F29)                                                             | 6 (F2, F4, F6, F11, F19, F28)                                                                                                           | 12 (F2, F4, F6, F11, F17, F20, F23, F24, F25, F27, F28, F29)                                                                  |
| HS                              | D=10 | 20 (F4, F5, F6, F7, F8, F9, F14, F15, F16, F17, F19, F20, F21, F22, F23, F24, F25, F27, F28, F29)                                       | 19 (F4, F5, F6, F7, F8, F9, F10, F11, F16, F17, F20, F21, F22, F23, F24, F25, F27, F28, F29)                                  | 19 (F4, F5, F6, F7, F8, F9, F14, F16, F17, F19, F20, F21, F22, F23, F24, F25, F27, F28, F29)                                            | 17 (F4, F5, F6, F7, F8, F9, F16, F17, F20, F21, F22, F23, F24, F25, F27, F28, F29)                                            |
|                                 | D=50 | 1 (F6)                                                                                                                                  | 10 (F4, F6, F8, F20, F23, F24, F25, F26, F27, F28)                                                                            | 1 (F6)                                                                                                                                  | 7 (F6, F8, F20, F23, F24, F26, F27)                                                                                           |
| GSA                             | D=10 | 21 (F1, F2, F4, F5, F6, F7, F8, F9, F11, F16, F17, F20, F21, F22, F23, F24, F25, F26, F27, F28, F29)                                    | 20 (F1, F2, F4, F5, F6, F7, F8, F9, F11, F16, F17, F20, F21, F22, F23, F24, F25, F27, F28, F29)                               | 21 (F1, F2, F4, F5, F6, F7, F8, F9, F11, F16, F17, F20, F21, F22, F23, F24, F25, F26, F27, F28, F29)                                    | 19 (F2, F4, F5, F6, F7, F8, F9, F11, F16, F17, F20, F21, F22, F23, F24, F25, F27, F28, F29)                                   |
|                                 | D=50 | 8 (F1, F2, F4, F6, F7, F11, F26, F28)                                                                                                   | 13 (F2, F4, F6, F7, F8, F11, F20, F23, F24, F25, F26, F28, F29)                                                               | 7 (F2, F4, F6, F7, F11, F26, F28)                                                                                                       | 11 (F2, F4, F6, F7, F8, F11, F23, F24, F25, F28, F29)                                                                         |
| GWO                             | D=10 | 20 (F3, F4, F5, F6, F7, F8, F9, F10, F11, F14, F15, F16, F17, F19, F20, F21, F22, F23, F24, F25, F26, F27, F28, F29)                    | 20 (F4, F5, F6, F7, F8, F9, F10, F11, F16, F17, F20, F21, F22, F23, F24, F25, F26, F27, F28, F29)                             | 21 (F2, F3, F4, F5, F6, F7, F8, F9, F10, F11, F14, F15, F16, F17, F19, F20, F21, F22, F23, F24, F25, F26, F27, F28, F29)                | 21 (F2, F4, F5, F6, F7, F8, F9, F10, F11, F16, F17, F20, F21, F22, F23, F24, F25, F26, F27, F28, F29)                         |
|                                 | D=50 | 2 (F6, F20)                                                                                                                             | 9 (F6, F17, F20, F23, F24, F25, F27, F28, F29)                                                                                | 2 (F6, F20)                                                                                                                             | 8 (F6, F17, F20, F23, F24, F25, F27, F29)                                                                                     |



|     |      |                                                                                                                           |                                                                                                                 |                                                                                                                           |                                                                                                   |
|-----|------|---------------------------------------------------------------------------------------------------------------------------|-----------------------------------------------------------------------------------------------------------------|---------------------------------------------------------------------------------------------------------------------------|---------------------------------------------------------------------------------------------------|
| ABC | D=10 | 25 (F2, F4, F5, F6, F7, F8, F9, F10, F11, F13, F14, F15, F16, F17, F19, F20, F21, F22, F23, F24, F25, F26, F27, F28, F29) | 23 (F2, F4, F5, F6, F7, F8, F9, F10, F11, F14, F15, F16, F17, F20, F21, F22, F23, F24, F25, F26, F27, F28, F29) | 25 (F2, F4, F5, F6, F7, F8, F9, F10, F11, F13, F14, F15, F16, F17, F19, F20, F21, F22, F23, F24, F25, F26, F27, F28, F29) | 20 (F4, F5, F6, F7, F8, F9, F10, F11, F16, F17, F20, F21, F22, F23, F24, F25, F26, F27, F28, F29) |
|     | D=50 | 1 (F6)                                                                                                                    | 12 (F4, F6, F7, F8, F17, F20, F23, F24, F25, F27, F28, F29)                                                     | 1 (F6)                                                                                                                    | 12 (F4, F6, F7, F8, F17, F20, F23, F24, F25, F27, F28, F29)                                       |
| PSO | D=10 | 19 (F5, F6, F7, F8, F11, F14, F16, F17, F20, F21, F22, F23, F24, F25, F27, F28, F29)                                      | 15 (F5, F6, F7, F8, F16, F17, F20, F21, F22, F23, F24, F25, F27, F28, F29)                                      | 21 (F2, F3, F4, F5, F6, F7, F8, F9, F11, F14, F16, F17, F19, F20, F21, F22, F24, F25, F27, F28, F29)                      | 19 (F2, F3, F4, F5, F6, F7, F8, F9, F16, F17, F20, F21, F22, F23, F24, F25, F27, F28, F29)        |
|     | D=50 | 1 (F6)                                                                                                                    | 6 (F6, F20, F23, F24, F25, F27)                                                                                 | 1 (F6)                                                                                                                    | 8 (F6, F8, F20, F23, F24, F25, F27, F28)                                                          |
| FA  | D=10 | 18 (F5, F6, F7, F8, F14, F15, F16, F17, F19, F20, F21, F22, F23, F24, F25, F27, F28, F29)                                 | 17 (F5, F6, F7, F8, F10, F14, F16, F17, F20, F21, F22, F23, F24, F25, F27, F28, F29)                            | 16 (F5, F6, F7, F8, F14, F17, F19, F20, F21, F22, F23, F24, F25, F27, F28, F29)                                           | 17 (F5, F6, F7, F8, F10, F14, F16, F17, F20, F21, F22, F23, F24, F25, F27, F28, F29)              |
|     | D=50 | 1 (F6)                                                                                                                    | 5 (F6, F20, F23, F24, F25)                                                                                      | 1 (F6)                                                                                                                    | 5 (F6, F20, F23, F24, F25)                                                                        |
| BA  | D=10 | 22 (F4, F5, F6, F7, F8, F9, F11, F14, F15, F16, F17, F19, F20, F21, F22, F23, F24, F25, F26, F27, F28, F29)               | 21 (F4, F5, F6, F7, F8, F9, F11, F14, F15, F16, F17, F19, F20, F21, F22, F23, F24, F25, F27, F28, F29)          | 22 (F4, F5, F6, F7, F8, F9, F11, F14, F15, F16, F17, F19, F20, F21, F22, F23, F24, F25, F26, F27, F28, F29)               | 19 (F4, F5, F6, F7, F8, F11, F14, F16, F17, F19, F20, F21, F22, F23, F24, F25, F27, F28, F29)     |
|     | D=50 | 1 (F6)                                                                                                                    | 8 (F6, F20, F23, F24, F25, F26, F27, F28)                                                                       | 1 (F6)                                                                                                                    | 5 (F6, F21, F23, F24, F27)                                                                        |
| GA  | D=10 | 23 (F4, F5, F6, F7, F8, F9, F10, F11, F13, F14, F15, F16, F17, F20, F21, F22, F23, F24, F25, F26, F27, F28, F29)          | 18 (F4, F5, F6, F7, F8, F9, F16, F17, F20, F21, F22, F23, F24, F25, F26, F27, F28, F29)                         | 23 (F4, F5, F6, F7, F8, F9, F10, F11, F13, F14, F15, F16, F17, F20, F21, F22, F23, F24, F25, F26, F27, F28, F29)          | 17 (F4, F5, F6, F7, F8, F16, F17, F20, F21, F22, F23, F24, F25, F26, F27, F28, F29)               |
|     | D=50 | 1 (F6)                                                                                                                    | 9 (F6, F8, F20, F23, F24, F25, F27, F28, F29)                                                                   | 1 (F6)                                                                                                                    | 7 (F6, F8, F20, F23, F24, F27, F29)                                                               |
| IA  | D=10 | 16 (F5, F6, F7, F8, F16, F17, F19, F20, F21, F22, F23, F24, F25, F27, F28, F29)                                           | 15 (F5, F6, F7, F8, F16, F17, F20, F21, F22, F23, F24, F25, F27, F28, F29)                                      | 14 (F5, F6, F7, F8, F17, F20, F21, F22, F23, F24, F25, F27, F28, F29)                                                     | 15 (F5, F6, F7, F8, F16, F17, F20, F21, F22, F23, F24, F25, F27, F28, F29)                        |
|     | D=50 | 1 (F6)                                                                                                                    | 5 (F6, F20, F23, F24, F25)                                                                                      | 1 (F6)                                                                                                                    | 4 (F6, F20, F23, F24)                                                                             |

# Supplementary Material K

**Table S27.** BBOB functions comparison of mean error(AVERAGE $\pm$ STD) under D=10 on parameters I for 11 compared NIOAs

| Problems | GA             | PSO            | ABC            | BA             | IA             | FA             | CS                               | DE                               | GSA                              | GWO            | HS             |
|----------|----------------|----------------|----------------|----------------|----------------|----------------|----------------------------------|----------------------------------|----------------------------------|----------------|----------------|
| F1       | 4.25E+05       | 4.06E+09       | 2.35E+06       | 6.76E+08       | 9.13E+09       | 1.58E+10       | 4.08E+03                         | 5.95E+03                         | <b>2.46E+02</b>                  | 1.46E+05       | 3.37E+08       |
|          | $\pm 3.58E+05$ | $\pm 1.31E+09$ | $\pm 2.79E+06$ | $\pm 1.89E+08$ | $\pm 4.60E+09$ | $\pm 5.63E+09$ | $\pm 3.46E+03$                   | $\pm 5.28E+03$                   | <b><math>\pm 2.02E+02</math></b> | $\pm 5.07E+05$ | $\pm 2.71E+08$ |
| F2       | 3.40E+02       | 1.33E+03       | 2.28E+02       | 4.05E+02       | 5.10E+03       | 7.39E+03       | <b>2.00E+02</b>                  | 2.00E+02                         | 2.11E+02                         | 2.95E+02       | 7.39E+02       |
|          | $\pm 7.24E+01$ | $\pm 4.25E+02$ | $\pm 2.93E+01$ | $\pm 6.06E+01$ | $\pm 2.85E+03$ | $\pm 2.93E+03$ | <b><math>\pm 0.00E+00</math></b> | $\pm 3.97E-01$                   | $\pm 7.71E+00$                   | $\pm 1.02E+02$ | $\pm 3.25E+02$ |
| F3       | 2.55E+04       | 2.83E+04       | 8.63E+03       | 2.55E+03       | 2.76E+04       | 1.73E+04       | <b>3.00E+02</b>                  | 8.35E+03                         | 7.57E+03                         | 9.81E+02       | 2.45E+04       |
|          | $\pm 1.38E+04$ | $\pm 1.13E+04$ | $\pm 2.72E+03$ | $\pm 7.32E+02$ | $\pm 1.86E+04$ | $\pm 4.13E+03$ | <b><math>\pm 0.00E+00</math></b> | $\pm 2.70E+03$                   | $\pm 1.11E+03$                   | $\pm 1.11E+03$ | $\pm 7.95E+03$ |
| F4       | 4.29E+02       | 6.58E+02       | 4.06E+02       | 4.33E+02       | 1.23E+03       | 1.98E+03       | <b>4.00E+02</b>                  | 4.04E+02                         | 4.06E+02                         | 4.14E+02       | 4.38E+02       |
|          | $\pm 2.65E+01$ | $\pm 7.64E+01$ | $\pm 2.08E+00$ | $\pm 8.65E+00$ | $\pm 4.72E+02$ | $\pm 7.13E+02$ | <b><math>\pm 1.66E-01</math></b> | $\pm 1.45E+00$                   | $\pm 2.38E-01$                   | $\pm 1.79E+01$ | $\pm 1.91E+01$ |
| F5       | 5.50E+02       | 5.76E+02       | 5.16E+02       | 5.37E+02       | 5.93E+02       | 6.14E+02       | 5.14E+02                         | <b>5.07E+02</b>                  | 5.53E+02                         | 5.10E+02       | 5.43E+02       |
|          | $\pm 6.67E+00$ | $\pm 5.66E+00$ | $\pm 4.99E+00$ | $\pm 4.54E+00$ | $\pm 2.32E+01$ | $\pm 1.18E+01$ | $\pm 3.64E+00$                   | <b><math>\pm 1.70E+00</math></b> | $\pm 6.52E+00$                   | $\pm 5.34E+00$ | $\pm 6.85E+00$ |
| F6       | 6.28E+02       | 6.47E+02       | 6.01E+02       | 6.20E+02       | 6.54E+02       | 6.58E+02       | 6.05E+02                         | <b>6.00E+02</b>                  | 6.18E+02                         | 6.01E+02       | 6.06E+02       |
|          | $\pm 4.85E+00$ | $\pm 7.07E+00$ | $\pm 3.11E-01$ | $\pm 5.55E+00$ | $\pm 1.49E+01$ | $\pm 5.08E+00$ | $\pm 1.63E+00$                   | <b><math>\pm 0.00E+00</math></b> | $\pm 1.00E+01$                   | $\pm 1.03E+00$ | $\pm 2.25E+00$ |
| F7       | 7.89E+02       | 9.57E+02       | 7.34E+02       | 7.93E+02       | 8.47E+02       | 1.07E+03       | 7.28E+02                         | 7.18E+02                         | <b>7.12E+02</b>                  | 7.27E+02       | 7.67E+02       |
|          | $\pm 2.13E+01$ | $\pm 4.57E+01$ | $\pm 6.40E+00$ | $\pm 1.23E+01$ | $\pm 1.77E+01$ | $\pm 4.69E+01$ | $\pm 3.12E+00$                   | $\pm 1.91E+00$                   | <b><math>\pm 9.79E-01</math></b> | $\pm 8.06E+00$ | $\pm 8.21E+00$ |
| F8       | 8.59E+02       | 8.93E+02       | 8.16E+02       | 8.39E+02       | 8.82E+02       | 8.89E+02       | 8.17E+02                         | <b>8.07E+02</b>                  | 8.20E+02                         | 8.11E+02       | 8.42E+02       |
|          | $\pm 1.15E+01$ | $\pm 1.17E+01$ | $\pm 5.30E+00$ | $\pm 8.07E+00$ | $\pm 1.59E+01$ | $\pm 1.04E+01$ | $\pm 4.08E+00$                   | <b><math>\pm 1.98E+00</math></b> | $\pm 3.84E+00$                   | $\pm 5.11E+00$ | $\pm 9.04E+00$ |
| F9       | 9.95E+02       | 2.52E+03       | 9.22E+02       | 1.09E+03       | 2.10E+03       | 2.15E+03       | 9.34E+02                         | <b>9.00E+02</b>                  | <b>9.00E+02</b>                  | 9.10E+02       | 9.83E+02       |
|          | $\pm 1.39E+02$ | $\pm 6.12E+02$ | $\pm 2.23E+01$ | $\pm 4.09E+01$ | $\pm 7.32E+02$ | $\pm 1.94E+02$ | $\pm 1.80E+01$                   | <b><math>\pm 0.00E+00</math></b> | <b><math>\pm 0.00E+00</math></b> | $\pm 1.96E+01$ | $\pm 3.70E+01$ |
| F10      | 1.73E+03       | 2.24E+03       | 1.51E+03       | 2.31E+03       | 3.13E+03       | 2.42E+03       | 1.53E+03                         | <b>1.41E+03</b>                  | 2.76E+03                         | 1.47E+03       | 2.93E+03       |
|          | $\pm 2.62E+02$ | $\pm 2.81E+02$ | $\pm 1.59E+02$ | $\pm 2.10E+02$ | $\pm 3.20E+02$ | $\pm 9.35E+01$ | $\pm 8.20E+01$                   | <b><math>\pm 9.62E+01</math></b> | $\pm 3.51E+02$                   | $\pm 2.44E+02$ | $\pm 1.69E+02$ |
| F11      | 1.68E+03       | 1.95E+03       | 1.13E+03       | 1.23E+03       | 9.11E+03       | 2.26E+03       | <b>1.10E+03</b>                  | 1.10E+03                         | 1.13E+03                         | 1.12E+03       | 2.33E+03       |

|     |           |           |                  |           |           |           |                  |                  |           |           |           |
|-----|-----------|-----------|------------------|-----------|-----------|-----------|------------------|------------------|-----------|-----------|-----------|
| F12 | ±5.48E+02 | ±4.84E+02 | ±2.21E+01        | ±5.18E+01 | ±6.69E+03 | ±6.17E+02 | <b>±7.75E-01</b> | ±1.25E+00        | ±9.34E+00 | ±1.01E+01 | ±8.51E+02 |
|     | 1.27E+06  | 4.98E+07  | 7.59E+05         | 1.18E+07  | 6.25E+08  | 1.23E+09  | <b>5.13E+03</b>  | 2.07E+05         | 4.91E+05  | 4.84E+05  | 1.74E+07  |
|     | ±1.56E+06 | ±4.80E+07 | ±7.08E+05        | ±6.32E+06 | ±3.95E+08 | ±6.33E+08 | <b>±1.60E+03</b> | ±1.40E+05        | ±2.74E+05 | ±7.38E+05 | ±1.51E+07 |
| F13 | 1.39E+04  | 1.87E+05  | 5.27E+03         | 5.15E+04  | 7.58E+07  | 1.78E+07  | <b>1.32E+03</b>  | 2.84E+03         | 1.15E+04  | 9.48E+03  | 1.07E+05  |
|     | ±1.03E+04 | ±1.68E+05 | ±3.52E+03        | ±3.79E+04 | ±7.38E+07 | ±2.74E+07 | <b>±4.97E+00</b> | ±1.52E+03        | ±1.78E+03 | ±6.11E+03 | ±2.08E+05 |
| F14 | 7.30E+03  | 4.86E+03  | 1.63E+03         | 1.58E+03  | 1.94E+06  | 1.51E+03  | <b>1.42E+03</b>  | 1.42E+03         | 5.75E+03  | 2.17E+03  | 6.63E+03  |
|     | ±7.71E+03 | ±8.25E+03 | ±1.58E+02        | ±5.69E+01 | ±3.45E+06 | ±4.26E+01 | <b>±4.06E+00</b> | ±1.48E+01        | ±9.87E+02 | ±1.45E+03 | ±4.51E+03 |
| F15 | 1.09E+04  | 2.48E+04  | 2.08E+03         | 2.16E+03  | 5.60E+06  | 2.73E+03  | <b>1.51E+03</b>  | 1.51E+03         | 1.80E+04  | 2.69E+03  | 1.01E+04  |
|     | ±8.66E+03 | ±2.92E+04 | ±6.01E+02        | ±3.64E+02 | ±1.32E+07 | ±5.99E+02 | <b>±1.49E+00</b> | ±1.46E+01        | ±3.49E+03 | ±1.48E+03 | ±1.20E+04 |
| F16 | 1.71E+03  | 1.81E+03  | 1.65E+03         | 1.76E+03  | 2.43E+03  | 2.08E+03  | <b>1.60E+03</b>  | 1.62E+03         | 2.16E+03  | 1.70E+03  | 1.91E+03  |
|     | ±7.47E+01 | ±1.56E+02 | ±5.83E+01        | ±1.04E+02 | ±1.41E+02 | ±6.58E+01 | <b>±1.15E+00</b> | ±1.32E+01        | ±8.99E+01 | ±1.16E+02 | ±1.18E+02 |
| F17 | 1.85E+03  | 1.91E+03  | 1.72E+03         | 1.81E+03  | 2.16E+03  | 1.87E+03  | 1.73E+03         | <b>1.72E+03</b>  | 1.82E+03  | 1.74E+03  | 1.79E+03  |
|     | ±8.79E+01 | ±5.75E+01 | ±1.01E+01        | ±4.97E+01 | ±1.67E+02 | ±3.31E+01 | ±2.46E+00        | <b>±8.80E+00</b> | ±9.58E+01 | ±1.40E+01 | ±5.08E+01 |
| F18 | 2.46E+04  | 2.11E+05  | 7.19E+03         | 6.45E+04  | 1.65E+08  | 1.85E+08  | <b>1.93E+03</b>  | 2.35E+03         | 7.81E+03  | 3.03E+04  | 2.05E+05  |
|     | ±1.24E+04 | ±1.66E+05 | ±3.41E+03        | ±3.23E+04 | ±1.28E+08 | ±1.89E+08 | <b>±5.02E+01</b> | ±5.44E+02        | ±3.09E+03 | ±1.47E+04 | ±3.58E+05 |
| F19 | 2.24E+04  | 4.70E+04  | 2.63E+03         | 2.45E+03  | 9.67E+06  | 4.09E+03  | 1.91E+03         | <b>1.90E+03</b>  | 3.18E+04  | 4.79E+03  | 6.96E+03  |
|     | ±1.39E+04 | ±3.51E+04 | ±1.15E+03        | ±4.33E+02 | ±1.47E+07 | ±3.33E+03 | ±9.63E-01        | <b>±3.89E+00</b> | ±9.06E+03 | ±5.07E+03 | ±5.24E+03 |
| F20 | 2.06E+03  | 2.17E+03  | 2.02E+03         | 2.13E+03  | 2.36E+03  | 2.14E+03  | 2.02E+03         | <b>2.01E+03</b>  | 2.26E+03  | 2.04E+03  | 2.04E+03  |
|     | ±1.86E+01 | ±4.67E+01 | ±9.44E+00        | ±6.86E+01 | ±7.07E+01 | ±2.22E+01 | ±3.44E+00        | <b>±7.21E+00</b> | ±4.70E+01 | ±2.75E+01 | ±1.23E+01 |
| F21 | 2.32E+03  | 2.31E+03  | 2.22E+03         | 2.28E+03  | 2.37E+03  | 2.37E+03  | <b>2.20E+03</b>  | 2.23E+03         | 2.35E+03  | 2.29E+03  | 2.35E+03  |
|     | ±4.55E+01 | ±7.76E+01 | ±7.47E+00        | ±6.79E+01 | ±4.73E+01 | ±3.20E+01 | <b>±7.03E-01</b> | ±1.68E+01        | ±1.54E+01 | ±5.04E+01 | ±7.17E+00 |
| F22 | 2.43E+03  | 2.77E+03  | 2.28E+03         | 2.38E+03  | 3.08E+03  | 3.54E+03  | <b>2.26E+03</b>  | 2.27E+03         | 2.30E+03  | 2.30E+03  | 2.34E+03  |
|     | ±1.70E+02 | ±1.79E+02 | ±3.26E+01        | ±2.27E+01 | ±3.29E+02 | ±3.23E+02 | <b>±2.90E+01</b> | ±2.04E+01        | ±0.00E+00 | ±2.13E+01 | ±1.55E+01 |
| F23 | 2.65E+03  | 2.66E+03  | <b>2.61E+03</b>  | 2.64E+03  | 2.76E+03  | 2.79E+03  | 2.61E+03         | 2.62E+03         | 2.72E+03  | 2.61E+03  | 2.64E+03  |
|     | ±9.79E+00 | ±1.41E+01 | <b>±7.15E+01</b> | ±5.63E+00 | ±3.22E+01 | ±3.67E+01 | ±2.43E+00        | ±2.37E+00        | ±3.56E+01 | ±7.87E+00 | ±7.59E+00 |
| F24 | 2.74E+03  | 2.79E+03  | 2.56E+03         | 2.75E+03  | 2.89E+03  | 2.95E+03  | <b>2.51E+03</b>  | 2.65E+03         | 2.53E+03  | 2.74E+03  | 2.77E+03  |

|     |           |           |           |           |           |           |                  |                  |           |                  |           |
|-----|-----------|-----------|-----------|-----------|-----------|-----------|------------------|------------------|-----------|------------------|-----------|
| F25 | ±3.84E+01 | ±2.67E+01 | ±7.38E+01 | ±5.79E+01 | ±4.57E+01 | ±5.18E+01 | <b>±2.33E+01</b> | ±6.41E+01        | ±9.39E+01 | ±1.34E+01        | ±2.09E+01 |
|     | 2.97E+03  | 3.13E+03  | 2.91E+03  | 2.96E+03  | 3.41E+03  | 3.98E+03  | <b>2.70E+03</b>  | 2.90E+03         | 2.94E+03  | 2.93E+03         | 2.97E+03  |
|     | ±2.52E+01 | ±5.52E+01 | ±5.95E+01 | ±1.10E+01 | ±1.38E+02 | ±3.86E+02 | <b>±1.06E+02</b> | ±1.83E+00        | ±1.60E-02 | ±1.93E+01        | ±1.17E+01 |
| F26 | 3.12E+03  | 3.41E+03  | 2.92E+03  | 3.24E+03  | 4.08E+03  | 4.44E+03  | <b>2.69E+03</b>  | 2.84E+03         | 3.09E+03  | 2.91E+03         | 3.68E+03  |
|     | ±1.17E+02 | ±3.70E+02 | ±9.46E+01 | ±4.09E+02 | ±3.11E+02 | ±2.95E+02 | <b>±9.87E+01</b> | ±1.13E+02        | ±5.55E+02 | ±5.16E+01        | ±4.27E+02 |
| F27 | 3.12E+03  | 3.12E+03  | 3.10E+03  | 3.11E+03  | 3.27E+03  | 3.33E+03  | 3.09E+03         | <b>3.07E+03</b>  | 3.23E+03  | 3.09E+03         | 3.11E+03  |
|     | ±9.06E+00 | ±2.18E+01 | ±5.30E+00 | ±2.12E+01 | ±6.35E+01 | ±4.40E+01 | ±1.71E+00        | <b>±3.52E+00</b> | ±2.36E+01 | ±3.34E+00        | ±8.09E+00 |
| F28 | 3.50E+03  | 3.40E+03  | 3.23E+03  | 3.32E+03  | 3.83E+03  | 3.91E+03  | <b>3.12E+03</b>  | 3.27E+03         | 3.38E+03  | 3.34E+03         | 3.52E+03  |
|     | ±5.07E+01 | ±1.02E+02 | ±1.34E+02 | ±1.04E+02 | ±1.55E+02 | ±1.61E+02 | <b>±2.50E+01</b> | ±1.62E+00        | ±3.08E+01 | ±1.01E+02        | ±5.45E+01 |
| F29 | 3.21E+03  | 3.28E+03  | 3.19E+03  | 3.24E+03  | 3.63E+03  | 3.43E+03  | 3.17E+03         | 3.17E+03         | 3.36E+03  | <b>3.17E+03</b>  | 3.34E+03  |
|     | ±1.58E+01 | ±8.15E+01 | ±2.52E+01 | ±7.68E+01 | ±1.70E+02 | ±5.82E+01 | ±9.61E+00        | ±9.81E+00        | ±7.98E+01 | <b>±1.64E+01</b> | ±5.63E+01 |
| F30 | 1.08E+06  | 1.68E+06  | 1.79E+05  | 6.55E+05  | 4.17E+07  | 3.10E+07  | 1.12E+04         | <b>3.80E+03</b>  | 7.17E+05  | 4.19E+05         | 5.75E+06  |
|     | ±8.73E+05 | ±2.49E+06 | ±1.88E+05 | ±4.72E+05 | ±4.35E+07 | ±1.41E+07 | ±6.75E+03        | <b>±5.66E+02</b> | ±1.10E+05 | ±6.44E+05        | ±2.37E+06 |

**Table S28.** BBOB functions comparison of mean error(AVERAGE±STD) under D=50 on parameters I for 11 compared NIOAs

| Problems | GA        | PSO       | ABC       | BA        | IA        | FA        | CS               | DE        | GSA              | GWO             | HS        |
|----------|-----------|-----------|-----------|-----------|-----------|-----------|------------------|-----------|------------------|-----------------|-----------|
| F1       | 3.52E+09  | 1.76E+11  | 5.15E+07  | 3.17E+10  | 8.84E+10  | 1.94E+11  | <b>1.14E+03</b>  | 5.59E+03  | 1.27E+03         | 4.82E+09        | 1.87E+07  |
|          | ±3.58E+09 | ±1.95E+10 | ±2.11E+07 | ±4.45E+09 | ±1.44E+10 | ±9.01E+09 | <b>±1.55E+03</b> | ±4.26E+03 | ±1.26E+03        | ±2.38E+09       | ±2.76E+06 |
| F2       | 1.16E+03  | 4.39E+04  | 3.98E+02  | 6.76E+03  | 2.91E+04  | 6.68E+04  | 2.00E+02         | 1.58E+03  | <b>2.00E+02</b>  | 1.42E+03        | 9.63E+02  |
|          | ±6.38E+02 | ±1.32E+04 | ±4.60E+01 | ±7.06E+02 | ±1.24E+04 | ±1.20E+04 | ±1.95E-04        | ±5.75E+02 | <b>±5.34E-05</b> | ±3.22E+02       | ±1.94E+02 |
| F3       | 3.57E+05  | 5.08E+05  | 2.22E+05  | 7.55E+04  | 2.06E+05  | 2.24E+05  | <b>3.06E+04</b>  | 1.78E+05  | 1.42E+05         | 6.32E+04        | 3.10E+05  |
|          | ±8.70E+04 | ±1.07E+05 | ±2.17E+04 | ±1.27E+04 | ±1.96E+04 | ±1.57E+04 | <b>±3.23E+03</b> | ±6.76E+04 | ±1.06E+04        | ±1.60E+04       | ±4.41E+04 |
| F4       | 7.76E+02  | 3.87E+04  | 6.03E+02  | 2.81E+03  | 2.25E+04  | 6.65E+04  | <b>4.44E+02</b>  | 4.46E+02  | 5.18E+02         | 8.27E+02        | 6.15E+02  |
|          | ±6.52E+01 | ±6.76E+03 | ±3.53E+01 | ±5.39E+02 | ±6.26E+03 | ±4.49E+03 | <b>±2.19E+01</b> | ±8.84E-01 | ±4.14E+01        | ±1.50E+02       | ±3.44E+01 |
| F5       | 1.03E+03  | 1.47E+03  | 7.58E+02  | 1.02E+03  | 1.11E+03  | 1.42E+03  | 7.83E+02         | 6.98E+02  | 8.23E+02         | <b>6.68E+02</b> | 6.76E+02  |

|     |           |           |           |           |           |           |                  |                  |                  |                  |                  |
|-----|-----------|-----------|-----------|-----------|-----------|-----------|------------------|------------------|------------------|------------------|------------------|
| F6  | ±2.71E+01 | ±6.36E+01 | ±3.06E+01 | ±3.37E+01 | ±5.07E+01 | ±2.66E+01 | ±2.63E+01        | ±1.89E+01        | ±1.73E+01        | <b>±1.89E+01</b> | ±8.74E+01        |
|     | 6.87E+02  | 7.19E+02  | 6.03E+02  | 6.61E+02  | 6.82E+02  | 7.09E+02  | 6.48E+02         | <b>6.00E+02</b>  | 6.50E+02         | 6.08E+02         | 6.03E+02         |
|     | ±5.76E+00 | ±5.51E+00 | ±9.36E-01 | ±5.51E+00 | ±9.33E+00 | ±2.29E+00 | ±6.21E+00        | <b>±0.00E+00</b> | ±4.18E+00        | ±3.41E+00        | ±1.31E+00        |
| F7  | 1.70E+03  | 5.17E+03  | 1.12E+03  | 2.08E+03  | 1.85E+03  | 4.87E+03  | 1.02E+03         | 9.58E+02         | <b>7.89E+02</b>  | 9.75E+02         | 1.15E+03         |
|     | ±1.68E+02 | ±2.95E+02 | ±2.73E+01 | ±1.21E+02 | ±1.08E+02 | ±1.33E+02 | ±3.31E+01        | ±2.62E+01        | <b>±1.05E+01</b> | ±3.74E+01        | ±4.79E+01        |
| F8  | 1.36E+03  | 1.75E+03  | 1.06E+03  | 1.32E+03  | 1.41E+03  | 1.74E+03  | 1.09E+03         | 1.00E+03         | 1.14E+03         | 9.82E+02         | <b>9.25E+02</b>  |
|     | ±2.13E+01 | ±3.71E+01 | ±2.48E+01 | ±3.10E+01 | ±4.56E+01 | ±3.06E+01 | ±3.42E+01        | ±2.15E+01        | ±1.48E+01        | ±3.67E+01        | <b>±9.21E+01</b> |
| F9  | 2.26E+03  | 6.44E+04  | 1.24E+04  | 1.54E+04  | 2.15E+04  | 4.36E+04  | 1.41E+04         | <b>1.36E+03</b>  | 4.59E+03         | 4.47E+03         | 1.85E+03         |
|     | ±7.15E+02 | ±1.21E+04 | ±2.07E+03 | ±3.47E+03 | ±2.80E+03 | ±2.66E+03 | ±2.85E+03        | <b>±7.48E+02</b> | ±6.52E+02        | ±2.26E+03        | ±4.01E+02        |
| F10 | 1.28E+04  | 1.39E+04  | 6.52E+03  | 1.42E+04  | 1.24E+04  | 1.41E+04  | 7.07E+03         | 9.19E+03         | 7.39E+03         | <b>6.24E+03</b>  | 1.49E+04         |
|     | ±2.99E+02 | ±6.68E+02 | ±4.16E+02 | ±4.69E+02 | ±6.41E+02 | ±2.61E+02 | ±2.31E+02        | ±5.28E+02        | ±6.37E+02        | <b>±5.87E+02</b> | ±4.46E+02        |
| F11 | 1.65E+04  | 3.92E+04  | 4.45E+03  | 4.87E+03  | 2.64E+04  | 2.58E+04  | 1.23E+03         | <b>1.21E+03</b>  | 1.22E+03         | 3.00E+03         | 6.22E+03         |
|     | ±8.96E+03 | ±1.13E+04 | ±1.44E+03 | ±9.35E+02 | ±8.97E+03 | ±3.18E+03 | ±1.46E+01        | <b>±4.00E+01</b> | ±1.08E+01        | ±1.58E+03        | ±2.89E+03        |
| F12 | 3.15E+07  | 4.38E+10  | 2.99E+07  | 7.21E+09  | 4.86E+10  | 8.78E+10  | <b>6.72E+05</b>  | 2.64E+07         | 8.56E+05         | 2.94E+08         | 3.47E+07         |
|     | ±1.98E+07 | ±8.67E+09 | ±9.92E+06 | ±1.08E+09 | ±1.52E+10 | ±1.26E+10 | <b>±2.50E+05</b> | ±1.68E+07        | ±2.26E+05        | ±3.44E+08        | ±1.78E+07        |
| F13 | 1.47E+08  | 1.70E+10  | 1.36E+06  | 2.55E+09  | 3.82E+10  | 4.44E+10  | <b>9.68E+03</b>  | 2.12E+04         | 1.79E+04         | 1.35E+08         | 8.43E+05         |
|     | ±3.87E+08 | ±6.10E+09 | ±7.65E+05 | ±4.67E+08 | ±8.70E+09 | ±4.61E+09 | <b>±7.47E+03</b> | ±1.59E+04        | ±2.38E+03        | ±1.79E+08        | ±1.42E+05        |
| F14 | 6.61E+06  | 1.56E+07  | 1.34E+06  | 9.07E+05  | 9.63E+07  | 2.17E+07  | <b>1.88E+03</b>  | 5.31E+05         | 1.98E+04         | 1.92E+05         | 2.01E+06         |
|     | ±4.16E+06 | ±1.88E+07 | ±6.56E+05 | ±3.74E+05 | ±4.64E+07 | ±1.12E+07 | <b>±1.86E+02</b> | ±3.06E+05        | ±7.27E+03        | ±1.38E+05        | ±2.18E+06        |
| F15 | 3.61E+05  | 3.12E+09  | 4.63E+05  | 6.61E+08  | 1.14E+10  | 1.06E+10  | <b>2.71E+03</b>  | 1.60E+04         | 1.22E+04         | 4.65E+06         | 1.48E+05         |
|     | ±6.76E+05 | ±1.55E+09 | ±3.06E+05 | ±2.05E+08 | ±4.42E+09 | ±2.11E+09 | <b>±8.10E+02</b> | ±1.08E+04        | ±3.48E+03        | ±8.68E+06        | ±2.85E+04        |
| F16 | 3.61E+03  | 6.88E+03  | 3.16E+03  | 5.00E+03  | 7.12E+03  | 8.97E+03  | 3.19E+03         | <b>2.84E+03</b>  | 3.52E+03         | 2.84E+03         | 4.84E+03         |
|     | ±4.60E+02 | ±4.84E+02 | ±3.00E+02 | ±2.68E+02 | ±1.16E+03 | ±4.57E+02 | ±1.27E+02        | <b>±2.51E+02</b> | ±3.25E+02        | ±2.57E+02        | ±3.23E+02        |
| F17 | 3.22E+03  | 2.29E+04  | 3.06E+03  | 4.73E+03  | 2.28E+04  | 2.20E+04  | 2.81E+03         | 2.67E+03         | 3.56E+03         | <b>2.62E+03</b>  | 3.73E+03         |
|     | ±3.94E+02 | ±1.77E+04 | ±1.26E+02 | ±3.80E+02 | ±2.01E+04 | ±9.93E+03 | ±1.57E+02        | ±2.27E+02        | ±3.37E+02        | <b>±1.68E+02</b> | ±3.73E+02        |
| F18 | 1.17E+07  | 6.57E+07  | 2.69E+06  | 1.03E+07  | 1.73E+08  | 7.47E+07  | <b>1.41E+05</b>  | 1.34E+06         | 1.84E+05         | 2.19E+06         | 1.82E+07         |

|     |           |           |           |           |           |           |                  |                  |                  |                  |                  |
|-----|-----------|-----------|-----------|-----------|-----------|-----------|------------------|------------------|------------------|------------------|------------------|
| F19 | ±8.47E+06 | ±5.63E+07 | ±1.23E+06 | ±4.51E+06 | ±1.08E+08 | ±2.07E+07 | <b>±3.36E+04</b> | ±4.95E+05        | ±4.90E+04        | ±3.67E+06        | ±9.76E+06        |
|     | 9.53E+05  | 2.30E+09  | 2.03E+05  | 3.21E+08  | 5.62E+09  | 4.72E+09  | <b>2.35E+03</b>  | 7.57E+03         | 1.69E+04         | 1.60E+06         | 7.79E+04         |
|     | ±2.05E+06 | ±1.02E+09 | ±8.59E+04 | ±8.09E+07 | ±2.64E+09 | ±1.14E+09 | <b>±3.39E+02</b> | ±1.73E+03        | ±2.60E+03        | ±2.94E+06        | ±2.10E+04        |
| F20 | 3.50E+03  | 4.21E+03  | 2.94E+03  | 3.75E+03  | 4.46E+03  | 3.85E+03  | 2.90E+03         | <b>2.49E+03</b>  | 3.44E+03         | 2.68E+03         | 4.00E+03         |
|     | ±1.87E+02 | ±2.28E+02 | ±2.10E+02 | ±1.96E+02 | ±2.52E+02 | ±8.99E+01 | ±1.19E+02        | <b>±1.25E+02</b> | ±2.69E+02        | ±2.19E+02        | ±1.94E+02        |
| F21 | 2.93E+03  | 3.20E+03  | 2.58E+03  | 2.80E+03  | 2.93E+03  | 3.27E+03  | 2.56E+03         | 2.52E+03         | 2.69E+03         | <b>2.47E+03</b>  | 2.57E+03         |
|     | ±2.52E+01 | ±4.86E+01 | ±2.27E+01 | ±4.07E+01 | ±7.28E+01 | ±3.78E+01 | ±3.30E+01        | ±1.87E+01        | ±3.10E+01        | <b>±2.46E+01</b> | ±9.11E+01        |
| F22 | 1.45E+04  | 1.53E+04  | 8.22E+03  | 1.58E+04  | 1.46E+04  | 1.58E+04  | 8.96E+03         | 1.08E+04         | 1.11E+04         | <b>8.20E+03</b>  | 1.63E+04         |
|     | ±5.08E+02 | ±7.23E+02 | ±5.14E+02 | ±4.26E+02 | ±8.57E+02 | ±2.88E+02 | ±2.31E+02        | ±1.55E+03        | ±5.02E+02        | <b>±6.51E+02</b> | ±5.03E+02        |
| F23 | 3.44E+03  | 3.88E+03  | 3.05E+03  | 3.25E+03  | 4.00E+03  | 4.59E+03  | 2.99E+03         | 2.90E+03         | 4.02E+03         | 2.91E+03         | <b>2.83E+03</b>  |
|     | ±4.88E+01 | ±1.16E+02 | ±3.73E+01 | ±2.64E+01 | ±1.48E+02 | ±1.03E+02 | ±2.40E+01        | ±2.01E+01        | ±1.30E+02        | ±3.28E+01        | <b>±1.82E+01</b> |
| F24 | 3.58E+03  | 3.88E+03  | 3.58E+03  | 3.37E+03  | 4.38E+03  | 5.11E+03  | 3.15E+03         | 3.28E+03         | 3.54E+03         | <b>3.08E+03</b>  | 3.28E+03         |
|     | ±3.69E+01 | ±1.38E+02 | ±8.35E+01 | ±3.27E+01 | ±1.36E+02 | ±1.16E+02 | ±2.34E+01        | ±3.74E+01        | ±5.55E+01        | <b>±8.31E+01</b> | ±1.82E+01        |
| F25 | 3.61E+03  | 3.60E+04  | 3.11E+03  | 4.98E+03  | 1.27E+04  | 3.70E+04  | 2.98E+03         | <b>2.93E+03</b>  | 3.05E+03         | 3.33E+03         | 3.11E+03         |
|     | ±9.51E+01 | ±5.90E+03 | ±2.66E+01 | ±4.14E+02 | ±2.20E+03 | ±2.30E+03 | ±2.19E+01        | <b>±3.67E-02</b> | ±3.06E+01        | ±1.58E+02        | ±5.21E+01        |
| F26 | 8.99E+03  | 1.59E+04  | 6.85E+03  | 9.17E+03  | 1.51E+04  | 2.40E+04  | 4.85E+03         | 5.33E+03         | <b>2.90E+03</b>  | 5.83E+03         | 4.73E+03         |
|     | ±3.53E+02 | ±1.46E+03 | ±1.06E+03 | ±3.03E+02 | ±1.23E+03 | ±9.12E+02 | ±1.59E+03        | ±1.90E+02        | <b>±0.00E+00</b> | ±3.53E+02        | ±2.16E+02        |
| F27 | 3.87E+03  | 4.34E+03  | 3.45E+03  | 3.56E+03  | 5.99E+03  | 6.77E+03  | 3.29E+03         | <b>3.20E+03</b>  | 5.37E+03         | 3.47E+03         | 3.46E+03         |
|     | ±6.97E+01 | ±2.94E+02 | ±3.54E+01 | ±9.19E+01 | ±4.64E+02 | ±2.72E+02 | ±3.75E+01        | <b>±2.19E-04</b> | ±3.42E+02        | ±7.03E+01        | ±5.56E+01        |
| F28 | 3.94E+03  | 1.24E+04  | 3.37E+03  | 4.36E+03  | 1.05E+04  | 1.82E+04  | <b>3.29E+03</b>  | 3.30E+03         | 3.30E+03         | 3.95E+03         | 3.63E+03         |
|     | ±1.17E+02 | ±1.38E+03 | ±3.32E+01 | ±2.06E+02 | ±1.19E+03 | ±9.98E+02 | <b>±1.97E+01</b> | ±2.69E-04        | ±1.44E+01        | ±2.78E+02        | ±1.28E+02        |
| F29 | 4.23E+03  | 9.70E+03  | 4.14E+03  | 6.16E+03  | 3.37E+04  | 4.13E+04  | 4.13E+03         | <b>3.98E+03</b>  | 5.00E+03         | 4.11E+03         | 4.06E+03         |
|     | ±2.49E+02 | ±1.73E+03 | ±1.76E+02 | ±4.68E+02 | ±3.26E+04 | ±1.61E+04 | ±8.21E+01        | <b>±2.52E+02</b> | ±2.32E+02        | ±3.11E+02        | ±4.95E+02        |
| F30 | 2.88E+06  | 2.85E+09  | 1.69E+06  | 6.41E+08  | 6.59E+09  | 7.51E+09  | 1.08E+06         | <b>1.32E+05</b>  | 7.06E+06         | 7.14E+07         | 4.01E+06         |
|     | ±7.01E+05 | ±1.31E+09 | ±4.33E+05 | ±1.36E+08 | ±2.96E+09 | ±1.10E+09 | ±1.94E+05        | <b>±9.94E+04</b> | ±4.02E+05        | ±3.56E+07        | ±6.01E+05        |

**Table S29.** BBOB functions comparison of mean error(AVERAGE $\pm$ STD) under D=10 on parameters II for 11 compared NIOAs

| Problems | GA                    | PSO                   | ABC                   | BA                    | IA                    | FA                    | CS                                      | DE                                      | GSA                                     | GWO                                     | HS                    |
|----------|-----------------------|-----------------------|-----------------------|-----------------------|-----------------------|-----------------------|-----------------------------------------|-----------------------------------------|-----------------------------------------|-----------------------------------------|-----------------------|
| F1       | 2.20E+06              | 1.86E+07              | 4.79E+06              | 1.54E+09              | 1.07E+10              | 2.13E+10              | 5.18E+02                                | 9.75E+02                                | <b>3.32E+02</b>                         | 2.51E+07                                | 3.71E+08              |
|          | $\pm 3.66\text{E}+06$ | $\pm 4.18\text{E}+06$ | $\pm 3.61\text{E}+06$ | $\pm 4.98\text{E}+08$ | $\pm 4.59\text{E}+09$ | $\pm 6.80\text{E}+09$ | $\pm 2.88\text{E}+02$                   | $\pm 1.31\text{E}+03$                   | <b><math>\pm 3.56\text{E}+02</math></b> | $\pm 1.04\text{E}+08$                   | $\pm 2.03\text{E}+08$ |
| F2       | 3.79E+02              | 2.11E+02              | 2.70E+02              | 6.03E+02              | 6.86E+03              | 1.03E+04              | <b>2.00E+02</b>                         | 2.00E+02                                | 2.00E+02                                | 2.83E+02                                | 7.39E+02              |
|          | $\pm 9.02\text{E}+01$ | $\pm 4.14\text{E}+00$ | $\pm 5.21\text{E}+01$ | $\pm 9.36\text{E}+01$ | $\pm 5.85\text{E}+03$ | $\pm 4.78\text{E}+03$ | <b><math>\pm 0.00\text{E}+00</math></b> | $\pm 6.46\text{E}-03$                   | $\pm 6.82\text{E}-05$                   | $\pm 3.54\text{E}+01$                   | $\pm 2.98\text{E}+02$ |
| F3       | 2.26E+04              | 3.52E+02              | 1.30E+04              | 6.34E+03              | 3.11E+04              | 2.27E+04              | <b>3.00E+02</b>                         | 5.02E+03                                | 3.76E+03                                | 2.08E+03                                | 2.16E+04              |
|          | $\pm 1.27\text{E}+04$ | $\pm 1.35\text{E}+01$ | $\pm 4.00\text{E}+03$ | $\pm 2.10\text{E}+03$ | $\pm 1.93\text{E}+04$ | $\pm 4.19\text{E}+03$ | <b><math>\pm 0.00\text{E}+00</math></b> | $\pm 2.24\text{E}+03$                   | $\pm 1.14\text{E}+03$                   | $\pm 1.98\text{E}+03$                   | $\pm 5.04\text{E}+03$ |
| F4       | 4.44E+02              | 4.11E+02              | 4.12E+02              | 4.71E+02              | 1.47E+03              | 2.51E+03              | <b>4.00E+02</b>                         | 4.05E+02                                | 4.05E+02                                | 4.23E+02                                | 4.43E+02              |
|          | $\pm 2.58\text{E}+01$ | $\pm 1.56\text{E}+01$ | $\pm 1.45\text{E}+01$ | $\pm 2.32\text{E}+01$ | $\pm 6.68\text{E}+02$ | $\pm 1.13\text{E}+03$ | <b><math>\pm 7.82\text{E}-02</math></b> | $\pm 8.42\text{E}-01$                   | $\pm 2.94\text{E}-01$                   | $\pm 2.32\text{E}+01$                   | $\pm 2.14\text{E}+01$ |
| F5       | 5.58E+02              | 5.37E+02              | 5.20E+02              | 5.48E+02              | 5.94E+02              | 6.23E+02              | 5.13E+02                                | <b>5.08E+02</b>                         | 5.58E+02                                | 5.17E+02                                | 5.45E+02              |
|          | $\pm 1.27\text{E}+01$ | $\pm 7.23\text{E}+00$ | $\pm 5.21\text{E}+00$ | $\pm 3.27\text{E}+00$ | $\pm 1.90\text{E}+01$ | $\pm 1.18\text{E}+01$ | $\pm 3.79\text{E}+00$                   | <b><math>\pm 2.30\text{E}+00</math></b> | $\pm 9.32\text{E}+00$                   | $\pm 8.87\text{E}+00$                   | $\pm 5.93\text{E}+00$ |
| F6       | 6.36E+02              | 6.06E+02              | 6.02E+02              | 6.29E+02              | 6.60E+02              | 6.64E+02              | 6.02E+02                                | <b>6.00E+02</b>                         | 6.17E+02                                | 6.00E+02                                | 6.08E+02              |
|          | $\pm 7.07\text{E}+00$ | $\pm 2.33\text{E}+00$ | $\pm 1.02\text{E}+00$ | $\pm 7.86\text{E}+00$ | $\pm 1.39\text{E}+01$ | $\pm 4.90\text{E}+00$ | $\pm 1.11\text{E}+00$                   | <b><math>\pm 0.00\text{E}+00</math></b> | $\pm 9.73\text{E}+00$                   | $\pm 3.68\text{E}-01$                   | $\pm 2.93\text{E}+00$ |
| F7       | 8.24E+02              | 7.39E+02              | 7.42E+02              | 8.33E+02              | 8.43E+02              | 1.09E+03              | 7.25E+02                                | 7.20E+02                                | <b>7.13E+02</b>                         | 7.24E+02                                | 7.80E+02              |
|          | $\pm 3.65\text{E}+01$ | $\pm 3.86\text{E}+00$ | $\pm 8.49\text{E}+00$ | $\pm 2.30\text{E}+01$ | $\pm 2.06\text{E}+01$ | $\pm 5.87\text{E}+01$ | $\pm 4.53\text{E}+00$                   | $\pm 2.70\text{E}+00$                   | <b><math>\pm 1.30\text{E}+00</math></b> | $\pm 4.83\text{E}+00$                   | $\pm 1.23\text{E}+01$ |
| F8       | 8.65E+02              | 8.28E+02              | 8.21E+02              | 8.56E+02              | 8.93E+02              | 8.97E+02              | 8.13E+02                                | <b>8.08E+02</b>                         | 8.22E+02                                | 8.15E+02                                | 8.47E+02              |
|          | $\pm 1.44\text{E}+01$ | $\pm 6.97\text{E}+00$ | $\pm 5.85\text{E}+00$ | $\pm 5.54\text{E}+00$ | $\pm 1.45\text{E}+01$ | $\pm 8.93\text{E}+00$ | $\pm 3.31\text{E}+00$                   | <b><math>\pm 1.55\text{E}+00</math></b> | $\pm 4.76\text{E}+00$                   | $\pm 5.00\text{E}+00$                   | $\pm 6.53\text{E}+00$ |
| F9       | 1.12E+03              | 9.06E+02              | 9.78E+02              | 1.43E+03              | 2.32E+03              | 2.37E+03              | 9.04E+02                                | <b>9.00E+02</b>                         | <b>9.00E+02</b>                         | 9.05E+02                                | 1.07E+03              |
|          | $\pm 2.53\text{E}+02$ | $\pm 1.48\text{E}+00$ | $\pm 8.45\text{E}+01$ | $\pm 1.38\text{E}+02$ | $\pm 6.84\text{E}+02$ | $\pm 2.44\text{E}+02$ | $\pm 4.04\text{E}+00$                   | <b><math>\pm 0.00\text{E}+00</math></b> | <b><math>\pm 0.00\text{E}+00</math></b> | $\pm 9.10\text{E}+00$                   | $\pm 7.87\text{E}+01$ |
| F10      | 2.06E+03              | 1.95E+03              | 1.60E+03              | 2.33E+03              | 3.11E+03              | 2.57E+03              | 1.63E+03                                | 1.51E+03                                | 2.72E+03                                | <b>1.48E+03</b>                         | 2.85E+03              |
|          | $\pm 2.02\text{E}+02$ | $\pm 2.00\text{E}+02$ | $\pm 2.16\text{E}+02$ | $\pm 2.69\text{E}+02$ | $\pm 2.66\text{E}+02$ | $\pm 1.16\text{E}+02$ | $\pm 1.35\text{E}+02$                   | $\pm 1.25\text{E}+02$                   | $\pm 2.96\text{E}+02$                   | <b><math>\pm 2.73\text{E}+02</math></b> | $\pm 1.66\text{E}+02$ |
| F11      | 2.17E+03              | 1.13E+03              | 1.17E+03              | 1.35E+03              | 8.35E+03              | 4.26E+03              | <b>1.10E+03</b>                         | 1.10E+03                                | 1.13E+03                                | 1.13E+03                                | 1.97E+03              |
|          | $\pm 8.71\text{E}+02$ | $\pm 9.80\text{E}+00$ | $\pm 6.10\text{E}+01$ | $\pm 8.82\text{E}+01$ | $\pm 6.25\text{E}+03$ | $\pm 2.48\text{E}+03$ | <b><math>\pm 5.53\text{E}-01</math></b> | $\pm 1.04\text{E}+00$                   | $\pm 6.13\text{E}+00$                   | $\pm 3.97\text{E}+01$                   | $\pm 1.11\text{E}+03$ |

|     |           |           |           |           |           |           |                  |                  |           |           |           |
|-----|-----------|-----------|-----------|-----------|-----------|-----------|------------------|------------------|-----------|-----------|-----------|
| F12 | 1.76E+06  | 1.70E+06  | 1.39E+06  | 3.02E+07  | 8.07E+08  | 1.60E+09  | <b>4.26E+03</b>  | 1.74E+05         | 2.29E+05  | 5.72E+05  | 2.17E+07  |
|     | ±2.17E+06 | ±1.50E+06 | ±1.49E+06 | ±1.73E+07 | ±5.91E+08 | ±6.94E+08 | <b>±1.96E+03</b> | ±1.23E+05        | ±2.51E+05 | ±6.24E+05 | ±1.61E+07 |
| F13 | 1.68E+04  | 1.13E+04  | 1.07E+04  | 1.82E+05  | 1.16E+08  | 6.50E+07  | <b>1.31E+03</b>  | 1.80E+03         | 1.01E+04  | 1.01E+04  | 2.63E+04  |
|     | ±1.86E+04 | ±5.38E+03 | ±8.00E+03 | ±1.68E+05 | ±1.34E+08 | ±7.11E+07 | <b>±5.79E+00</b> | ±5.15E+02        | ±2.31E+03 | ±8.25E+03 | ±5.04E+04 |
| F14 | 1.17E+04  | 1.50E+03  | 1.94E+03  | 1.73E+03  | 5.08E+06  | 1.62E+03  | <b>1.42E+03</b>  | 1.42E+03         | 6.47E+03  | 1.83E+03  | 8.67E+03  |
|     | ±8.70E+03 | ±5.53E+01 | ±5.39E+02 | ±1.60E+02 | ±1.17E+07 | ±2.02E+02 | <b>±4.79E+00</b> | ±6.47E+00        | ±1.95E+03 | ±1.08E+03 | ±8.00E+03 |
| F15 | 9.22E+03  | 2.08E+03  | 3.00E+03  | 3.61E+03  | 9.80E+06  | 3.63E+03  | 1.50E+03         | <b>1.50E+03</b>  | 1.49E+04  | 3.31E+03  | 7.18E+03  |
|     | ±7.32E+03 | ±4.45E+02 | ±1.80E+03 | ±1.88E+03 | ±1.56E+07 | ±1.42E+03 | ±1.68E+00        | <b>±7.57E-01</b> | ±4.56E+03 | ±2.47E+03 | ±5.54E+03 |
| F16 | 1.76E+03  | 1.84E+03  | 1.74E+03  | 1.78E+03  | 2.52E+03  | 2.19E+03  | <b>1.60E+03</b>  | 1.62E+03         | 2.12E+03  | 1.66E+03  | 1.85E+03  |
|     | ±8.28E+01 | ±9.32E+01 | ±8.32E+01 | ±5.14E+01 | ±1.66E+02 | ±1.15E+02 | <b>±4.03E+00</b> | ±1.77E+01        | ±1.08E+02 | ±4.72E+01 | ±1.68E+02 |
| F17 | 1.88E+03  | 1.77E+03  | 1.74E+03  | 1.83E+03  | 2.25E+03  | 1.96E+03  | 1.73E+03         | <b>1.72E+03</b>  | 1.89E+03  | 1.74E+03  | 1.78E+03  |
|     | ±9.39E+01 | ±2.62E+01 | ±2.05E+01 | ±5.62E+01 | ±1.74E+02 | ±7.76E+01 | ±4.30E+00        | <b>±7.53E+00</b> | ±1.12E+02 | ±1.43E+01 | ±4.95E+01 |
| F18 | 3.99E+04  | 1.74E+04  | 1.38E+04  | 1.47E+05  | 1.80E+08  | 3.57E+08  | 1.91E+03         | <b>1.82E+03</b>  | 7.92E+03  | 3.19E+04  | 2.95E+05  |
|     | ±3.01E+04 | ±1.35E+04 | ±1.26E+04 | ±8.19E+04 | ±1.73E+08 | ±2.88E+08 | ±3.64E+01        | <b>±3.23E+00</b> | ±4.77E+03 | ±1.45E+04 | ±8.14E+05 |
| F19 | 2.50E+04  | 3.77E+03  | 3.11E+03  | 6.20E+03  | 3.46E+07  | 1.30E+06  | 1.90E+03         | <b>1.90E+03</b>  | 9.64E+03  | 7.67E+03  | 8.90E+03  |
|     | ±2.31E+04 | ±6.89E+03 | ±1.31E+03 | ±4.61E+03 | ±3.59E+07 | ±5.61E+06 | ±1.22E+00        | <b>±7.58E-01</b> | ±2.56E+03 | ±5.64E+03 | ±6.50E+03 |
| F20 | 2.09E+03  | 2.11E+03  | 2.03E+03  | 2.14E+03  | 2.40E+03  | 2.17E+03  | 2.03E+03         | <b>2.01E+03</b>  | 2.30E+03  | 2.06E+03  | 2.04E+03  |
|     | ±1.84E+01 | ±5.87E+01 | ±1.33E+01 | ±5.09E+01 | ±1.10E+02 | ±3.80E+01 | ±4.12E+00        | <b>±8.38E+00</b> | ±1.05E+02 | ±4.68E+01 | ±1.03E+01 |
| F21 | 2.33E+03  | 2.31E+03  | 2.24E+03  | 2.29E+03  | 2.38E+03  | 2.39E+03  | <b>2.20E+03</b>  | 2.26E+03         | 2.35E+03  | 2.31E+03  | 2.35E+03  |
|     | ±4.53E+01 | ±5.52E+01 | ±3.03E+01 | ±7.01E+01 | ±5.03E+01 | ±4.25E+01 | <b>±1.74E+00</b> | ±4.04E+01        | ±1.34E+01 | ±3.89E+00 | ±9.54E+00 |
| F22 | 2.49E+03  | 2.30E+03  | 2.29E+03  | 2.53E+03  | 3.11E+03  | 3.75E+03  | <b>2.27E+03</b>  | 2.29E+03         | 2.30E+03  | 2.30E+03  | 2.35E+03  |
|     | ±2.86E+02 | ±2.52E+01 | ±2.66E+01 | ±2.86E+02 | ±3.51E+02 | ±3.01E+02 | <b>±4.12E+01</b> | ±2.20E+01        | ±7.70E-02 | ±2.11E+01 | ±1.58E+01 |
| F23 | 2.67E+03  | 2.66E+03  | 2.63E+03  | 2.64E+03  | 2.79E+03  | 2.82E+03  | 2.61E+03         | <b>2.60E+03</b>  | 2.75E+03  | 2.62E+03  | 2.65E+03  |
|     | ±1.19E+01 | ±2.26E+01 | ±8.38E+00 | ±7.64E+00 | ±4.44E+01 | ±4.04E+01 | ±4.21E+00        | <b>±6.14E+01</b> | ±6.52E+01 | ±8.39E+00 | ±7.61E+00 |
| F24 | 2.79E+03  | 2.71E+03  | 2.65E+03  | 2.77E+03  | 2.90E+03  | 2.98E+03  | <b>2.54E+03</b>  | 2.71E+03         | 2.58E+03  | 2.75E+03  | 2.78E+03  |
|     | ±2.03E+01 | ±1.09E+02 | ±1.00E+02 | ±3.52E+01 | ±4.84E+01 | ±7.00E+01 | <b>±6.57E+01</b> | ±5.87E+01        | ±1.37E+02 | ±1.18E+01 | ±8.25E+00 |



|     |           |           |           |           |           |           |                  |                  |           |           |           |
|-----|-----------|-----------|-----------|-----------|-----------|-----------|------------------|------------------|-----------|-----------|-----------|
| F25 | 3.02E+03  | 2.94E+03  | 2.91E+03  | 3.01E+03  | 3.44E+03  | 4.30E+03  | <b>2.83E+03</b>  | 2.90E+03         | 2.93E+03  | 2.93E+03  | 2.97E+03  |
|     | ±6.42E+01 | ±2.01E+01 | ±7.12E+01 | ±2.36E+01 | ±2.54E+02 | ±5.22E+02 | <b>±1.09E+02</b> | ±6.35E+00        | ±1.98E+01 | ±1.64E+01 | ±1.01E+01 |
| F26 | 3.29E+03  | 3.01E+03  | 2.99E+03  | 3.36E+03  | 4.32E+03  | 4.67E+03  | <b>2.78E+03</b>  | 2.93E+03         | 3.47E+03  | 2.98E+03  | 3.44E+03  |
|     | ±2.86E+02 | ±2.68E+02 | ±8.11E+01 | ±4.73E+02 | ±3.85E+02 | ±3.49E+02 | <b>±8.39E+01</b> | ±1.03E+02        | ±6.01E+02 | ±2.38E+02 | ±4.58E+02 |
| F27 | 3.13E+03  | 3.13E+03  | 3.10E+03  | 3.10E+03  | 3.30E+03  | 3.34E+03  | 3.09E+03         | <b>3.08E+03</b>  | 3.22E+03  | 3.09E+03  | 3.11E+03  |
|     | ±1.66E+01 | ±3.48E+01 | ±9.00E+00 | ±1.39E+00 | ±1.09E+02 | ±8.94E+01 | ±1.31E+00        | <b>±7.34E+00</b> | ±3.02E+01 | ±2.36E+00 | ±7.44E+00 |
| F28 | 3.48E+03  | 3.30E+03  | 3.24E+03  | 3.40E+03  | 3.91E+03  | 4.07E+03  | <b>3.09E+03</b>  | 3.27E+03         | 3.34E+03  | 3.39E+03  | 3.49E+03  |
|     | ±1.07E+02 | ±1.37E+02 | ±6.90E+01 | ±1.02E+02 | ±2.20E+02 | ±1.88E+02 | <b>±8.56E+01</b> | ±1.68E+00        | ±9.42E+01 | ±6.91E+01 | ±2.49E+01 |
| F29 | 3.23E+03  | 3.25E+03  | 3.21E+03  | 3.25E+03  | 3.55E+03  | 3.60E+03  | 3.18E+03         | <b>3.17E+03</b>  | 3.36E+03  | 3.20E+03  | 3.35E+03  |
|     | ±2.80E+01 | ±5.17E+01 | ±2.73E+01 | ±4.86E+01 | ±1.67E+02 | ±1.45E+02 | ±9.87E+00        | <b>±1.20E+01</b> | ±1.21E+02 | ±4.80E+01 | ±6.79E+01 |
| F30 | 1.78E+06  | 5.13E+05  | 4.59E+05  | 5.25E+05  | 6.03E+07  | 4.69E+07  | 2.11E+04         | <b>3.79E+03</b>  | 2.86E+05  | 3.67E+05  | 5.32E+06  |
|     | ±1.46E+06 | ±6.79E+05 | ±4.01E+05 | ±4.80E+05 | ±4.59E+07 | ±2.08E+07 | ±1.97E+04        | <b>±6.05E+02</b> | ±6.85E+04 | ±8.11E+05 | ±2.88E+06 |

**Table S30.** BBOB functions comparison of mean error(AVERAGE±STD) under D=50 on parameters II for 11 compared NIOAs

| Problems | GA        | PSO              | ABC       | BA        | IA        | FA        | CS               | DE        | GSA       | GWO              | HS        |
|----------|-----------|------------------|-----------|-----------|-----------|-----------|------------------|-----------|-----------|------------------|-----------|
| F1       | 1.69E+10  | 1.63E+09         | 1.82E+08  | 5.72E+10  | 8.72E+10  | 2.12E+11  | <b>2.56E+03</b>  | 2.05E+05  | 5.60E+03  | 6.91E+09         | 1.59E+10  |
|          | ±1.54E+10 | ±1.03E+09        | ±7.86E+07 | ±8.91E+09 | ±8.40E+09 | ±1.12E+10 | <b>±2.95E+03</b> | ±5.27E+05 | ±8.11E+03 | ±3.22E+09        | ±2.99E+09 |
| F2       | 1.54E+03  | 5.98E+02         | 5.70E+02  | 1.31E+04  | 3.24E+04  | 8.62E+04  | <b>2.00E+02</b>  | 1.27E+04  | 4.06E+02  | 1.73E+03         | 1.28E+04  |
|          | ±5.95E+02 | ±1.28E+02        | ±8.94E+01 | ±1.75E+03 | ±1.34E+04 | ±1.34E+04 | <b>±7.90E-04</b> | ±7.90E+03 | ±2.46E+02 | ±5.70E+02        | ±2.60E+03 |
| F3       | 3.60E+05  | <b>2.75E+03</b>  | 2.34E+05  | 1.37E+05  | 1.87E+05  | 2.46E+05  | 2.02E+04         | 3.43E+05  | 1.86E+05  | 7.71E+04         | 3.01E+05  |
|          | ±7.89E+04 | <b>±5.64E+02</b> | ±2.50E+04 | ±2.84E+04 | ±3.03E+04 | ±2.12E+04 | ±2.54E+03        | ±1.40E+05 | ±2.90E+04 | ±1.76E+04        | ±4.60E+04 |
| F4       | 1.14E+03  | 6.77E+02         | 6.66E+02  | 5.72E+03  | 2.37E+04  | 7.31E+04  | <b>4.38E+02</b>  | 4.44E+02  | 5.13E+02  | 1.02E+03         | 2.36E+03  |
|          | ±2.44E+02 | ±5.04E+01        | ±3.99E+01 | ±1.41E+03 | ±6.21E+03 | ±7.54E+03 | <b>±4.42E+01</b> | ±2.06E+00 | ±6.26E+01 | ±2.42E+02        | ±2.65E+02 |
| F5       | 1.15E+03  | 9.56E+02         | 8.24E+02  | 1.11E+03  | 1.09E+03  | 1.47E+03  | 7.72E+02         | 8.26E+02  | 7.98E+02  | <b>6.94E+02</b>  | 9.86E+02  |
|          | ±2.61E+01 | ±3.35E+01        | ±2.27E+01 | ±3.43E+01 | ±5.45E+01 | ±3.26E+01 | ±4.03E+01        | ±3.40E+01 | ±4.72E+01 | <b>±3.08E+01</b> | ±2.11E+01 |

|     |           |           |           |           |           |           |                  |                  |                  |                  |           |
|-----|-----------|-----------|-----------|-----------|-----------|-----------|------------------|------------------|------------------|------------------|-----------|
| F6  | 7.00E+02  | 6.33E+02  | 6.07E+02  | 6.78E+02  | 6.82E+02  | 7.36E+02  | 6.33E+02         | <b>6.00E+02</b>  | 6.32E+02         | 6.12E+02         | 6.22E+02  |
|     | ±6.03E+00 | ±1.91E+01 | ±1.77E+00 | ±7.43E+00 | ±6.94E+00 | ±7.17E+00 | ±9.06E+00        | <b>±0.00E+00</b> | ±7.62E+00        | ±4.20E+00        | ±2.26E+00 |
| F7  | 2.43E+03  | 1.14E+03  | 1.19E+03  | 3.00E+03  | 1.80E+03  | 6.05E+03  | 1.09E+03         | 1.06E+03         | <b>9.41E+02</b>  | 1.04E+03         | 1.58E+03  |
|     | ±2.14E+02 | ±1.99E+01 | ±4.66E+01 | ±3.40E+02 | ±1.16E+02 | ±4.25E+02 | ±6.44E+01        | ±3.21E+01        | <b>±4.21E+01</b> | ±8.15E+01        | ±5.16E+01 |
| F8  | 1.48E+03  | 1.25E+03  | 1.12E+03  | 1.41E+03  | 1.40E+03  | 1.97E+03  | 1.07E+03         | 1.13E+03         | 1.09E+03         | <b>9.84E+02</b>  | 1.29E+03  |
|     | ±4.09E+01 | ±3.27E+01 | ±4.33E+01 | ±5.15E+01 | ±5.53E+01 | ±6.15E+01 | ±2.87E+01        | ±3.40E+01        | ±4.58E+01        | <b>±2.31E+01</b> | ±2.13E+01 |
| F9  | 4.20E+03  | 1.64E+04  | 1.52E+04  | 2.54E+04  | 2.18E+04  | 6.32E+04  | 1.18E+04         | <b>2.18E+03</b>  | 7.75E+03         | 4.25E+03         | 8.66E+03  |
|     | ±7.17E+02 | ±7.58E+03 | ±2.98E+03 | ±4.75E+03 | ±3.33E+03 | ±6.65E+03 | ±4.16E+03        | <b>±3.02E+03</b> | ±2.61E+03        | ±1.13E+03        | ±1.15E+03 |
| F10 | 1.34E+04  | 1.18E+04  | 7.68E+03  | 1.45E+04  | 1.26E+04  | 1.56E+04  | 7.12E+03         | 1.25E+04         | <b>5.91E+03</b>  | 6.63E+03         | 1.53E+04  |
|     | ±2.43E+02 | ±7.34E+02 | ±5.32E+02 | ±4.68E+02 | ±9.97E+02 | ±3.46E+02 | ±3.39E+02        | ±3.54E+02        | <b>±7.43E+02</b> | ±7.19E+02        | ±4.86E+02 |
| F11 | 1.97E+04  | 1.59E+03  | 6.42E+03  | 8.78E+03  | 3.19E+04  | 6.12E+04  | <b>1.22E+03</b>  | 1.27E+03         | 1.27E+03         | 3.89E+03         | 8.99E+03  |
|     | ±1.11E+04 | ±6.96E+01 | ±2.64E+03 | ±2.17E+03 | ±1.12E+04 | ±1.34E+04 | <b>±2.55E+01</b> | ±6.58E+01        | ±3.82E+01        | ±2.03E+03        | ±3.10E+03 |
| F12 | 4.25E+07  | 5.52E+08  | 8.85E+07  | 1.43E+10  | 6.02E+10  | 1.58E+11  | <b>2.25E+05</b>  | 3.42E+08         | 1.99E+08         | 6.46E+08         | 1.95E+09  |
|     | ±2.09E+07 | ±6.02E+08 | ±3.05E+07 | ±2.46E+09 | ±1.89E+10 | ±2.95E+10 | <b>±2.39E+05</b> | ±2.86E+08        | ±6.02E+08        | ±7.96E+08        | ±4.67E+08 |
| F13 | 3.07E+08  | 1.01E+08  | 5.91E+06  | 4.92E+09  | 3.49E+10  | 1.07E+11  | <b>4.24E+03</b>  | 1.58E+06         | 5.32E+04         | 8.87E+07         | 9.49E+06  |
|     | ±3.25E+08 | ±4.85E+07 | ±3.67E+06 | ±1.23E+09 | ±1.21E+10 | ±1.89E+10 | <b>±2.49E+03</b> | ±3.40E+06        | ±2.18E+04        | ±9.98E+07        | ±7.63E+06 |
| F14 | 8.47E+06  | 9.75E+04  | 2.22E+06  | 1.88E+06  | 1.34E+08  | 4.42E+08  | <b>1.58E+03</b>  | 6.47E+05         | 2.74E+05         | 4.29E+05         | 2.65E+06  |
|     | ±5.64E+06 | ±4.83E+04 | ±1.12E+06 | ±5.81E+05 | ±7.08E+07 | ±2.27E+08 | <b>±3.17E+01</b> | ±2.74E+05        | ±4.13E+05        | ±4.31E+05        | ±1.85E+06 |
| F15 | 1.89E+06  | 1.89E+07  | 1.28E+06  | 1.47E+09  | 1.03E+10  | 3.31E+10  | <b>1.96E+03</b>  | 2.25E+05         | 1.40E+04         | 5.88E+06         | 4.85E+05  |
|     | ±4.94E+06 | ±6.14E+06 | ±9.12E+05 | ±4.69E+08 | ±4.55E+09 | ±9.60E+09 | <b>±1.95E+02</b> | ±4.83E+05        | ±7.76E+03        | ±7.36E+06        | ±1.78E+05 |
| F16 | 4.69E+03  | 3.75E+03  | 3.48E+03  | 5.58E+03  | 7.68E+03  | 1.01E+04  | 3.04E+03         | 3.62E+03         | 3.58E+03         | <b>2.90E+03</b>  | 5.46E+03  |
|     | ±3.53E+02 | ±2.84E+02 | ±2.20E+02 | ±3.45E+02 | ±1.23E+03 | ±7.17E+02 | ±3.02E+02        | ±5.36E+02        | ±4.57E+02        | <b>±3.53E+02</b> | ±2.08E+02 |
| F17 | 3.59E+03  | 3.07E+03  | 3.32E+03  | 5.68E+03  | 2.47E+04  | 4.58E+04  | 2.78E+03         | 2.79E+03         | 3.46E+03         | <b>2.59E+03</b>  | 4.17E+03  |
|     | ±3.74E+02 | ±1.92E+02 | ±2.10E+02 | ±3.68E+02 | ±1.58E+04 | ±2.53E+04 | ±1.84E+02        | ±2.01E+02        | ±3.01E+02        | <b>±2.67E+02</b> | ±2.15E+02 |
| F18 | 9.46E+06  | 1.11E+06  | 5.84E+06  | 1.78E+07  | 2.70E+08  | 1.36E+08  | <b>3.32E+04</b>  | 2.74E+06         | 2.35E+05         | 2.15E+06         | 4.16E+07  |
|     | ±5.06E+06 | ±6.13E+05 | ±3.35E+06 | ±8.84E+06 | ±1.27E+08 | ±5.35E+07 | <b>±1.63E+04</b> | ±1.46E+06        | ±1.04E+05        | ±1.70E+06        | ±2.24E+07 |

|     |           |           |           |           |           |           |                  |                  |                  |                  |           |
|-----|-----------|-----------|-----------|-----------|-----------|-----------|------------------|------------------|------------------|------------------|-----------|
| F19 | 3.41E+06  | 1.07E+07  | 8.90E+05  | 8.45E+08  | 6.18E+09  | 6.40E+09  | <b>2.15E+03</b>  | 8.60E+03         | 1.89E+04         | 5.54E+06         | 2.82E+05  |
|     | ±6.33E+06 | ±2.79E+06 | ±5.24E+05 | ±2.89E+08 | ±1.97E+09 | ±1.46E+09 | <b>±1.87E+02</b> | ±3.12E+03        | ±1.15E+04        | ±2.22E+07        | ±8.04E+04 |
| F20 | 3.58E+03  | 3.02E+03  | 3.20E+03  | 3.93E+03  | 4.52E+03  | 3.98E+03  | 2.78E+03         | 2.72E+03         | 3.45E+03         | <b>2.70E+03</b>  | 4.15E+03  |
|     | ±2.24E+02 | ±1.73E+02 | ±1.50E+02 | ±1.91E+02 | ±2.47E+02 | ±7.84E+01 | ±2.08E+02        | ±1.43E+02        | ±3.15E+02        | <b>±2.17E+02</b> | ±1.96E+02 |
| F21 | 3.00E+03  | 2.75E+03  | 2.64E+03  | 2.88E+03  | 2.96E+03  | 3.33E+03  | 2.54E+03         | 2.63E+03         | 2.60E+03         | <b>2.49E+03</b>  | 2.78E+03  |
|     | ±3.52E+01 | ±3.99E+01 | ±4.34E+01 | ±2.91E+01 | ±4.96E+01 | ±3.02E+01 | ±3.77E+01        | ±3.35E+01        | ±6.68E+01        | <b>±2.82E+01</b> | ±1.88E+01 |
| F22 | 1.52E+04  | 1.23E+04  | 8.42E+03  | 1.60E+04  | 1.46E+04  | 1.61E+04  | 9.12E+03         | 1.42E+04         | 8.93E+03         | <b>8.09E+03</b>  | 1.65E+04  |
|     | ±2.86E+02 | ±3.39E+03 | ±2.41E+03 | ±4.35E+02 | ±5.22E+02 | ±1.93E+02 | ±3.71E+02        | ±5.15E+02        | ±6.97E+02        | <b>±5.14E+02</b> | ±3.53E+02 |
| F23 | 3.61E+03  | 3.30E+03  | 3.13E+03  | 3.32E+03  | 4.06E+03  | 4.72E+03  | 2.97E+03         | 3.04E+03         | 3.32E+03         | <b>2.93E+03</b>  | 3.25E+03  |
|     | ±7.60E+01 | ±8.55E+01 | ±4.43E+01 | ±3.81E+01 | ±2.33E+02 | ±1.37E+02 | ±4.12E+01        | ±3.70E+01        | ±1.98E+02        | <b>±3.57E+01</b> | ±2.87E+01 |
| F24 | 3.74E+03  | 3.52E+03  | 3.66E+03  | 3.42E+03  | 4.42E+03  | 5.22E+03  | 3.17E+03         | 3.32E+03         | 3.30E+03         | <b>3.12E+03</b>  | 3.40E+03  |
|     | ±6.38E+01 | ±1.21E+02 | ±7.73E+01 | ±3.27E+01 | ±2.02E+02 | ±1.85E+02 | ±4.68E+01        | ±3.96E+01        | ±8.00E+01        | <b>±1.04E+02</b> | ±2.21E+01 |
| F25 | 4.20E+03  | 3.14E+03  | 3.16E+03  | 7.62E+03  | 1.19E+04  | 4.17E+04  | 2.99E+03         | <b>2.93E+03</b>  | 3.03E+03         | 3.42E+03         | 4.52E+03  |
|     | ±3.07E+02 | ±3.28E+01 | ±3.94E+01 | ±1.53E+03 | ±1.22E+03 | ±2.90E+03 | ±3.01E+01        | <b>±2.66E-02</b> | ±3.98E+01        | ±2.03E+02        | ±2.86E+02 |
| F26 | 1.07E+04  | 6.27E+03  | 7.55E+03  | 1.01E+04  | 1.56E+04  | 2.60E+04  | 6.14E+03         | 6.35E+03         | <b>5.54E+03</b>  | 6.05E+03         | 9.10E+03  |
|     | ±3.06E+02 | ±2.59E+03 | ±7.62E+02 | ±4.61E+02 | ±1.17E+03 | ±1.23E+03 | ±1.20E+03        | ±4.14E+02        | <b>±2.84E+03</b> | ±5.63E+02        | ±2.82E+02 |
| F27 | 4.18E+03  | 3.48E+03  | 3.51E+03  | 3.72E+03  | 5.88E+03  | 7.22E+03  | 3.26E+03         | <b>3.20E+03</b>  | 3.92E+03         | 3.54E+03         | 3.92E+03  |
|     | ±5.24E+01 | ±1.24E+02 | ±5.31E+01 | ±9.70E+01 | ±4.19E+02 | ±3.30E+02 | ±2.86E+01        | <b>±1.43E-04</b> | ±2.15E+02        | ±7.92E+01        | ±6.57E+01 |
| F28 | 4.97E+03  | 3.43E+03  | 3.42E+03  | 6.07E+03  | 1.02E+04  | 1.90E+04  | <b>3.29E+03</b>  | 3.30E+03         | 3.34E+03         | 4.10E+03         | 5.28E+03  |
|     | ±3.75E+02 | ±1.32E+02 | ±3.99E+01 | ±1.07E+03 | ±1.29E+03 | ±1.03E+03 | <b>±1.61E+01</b> | ±1.47E-04        | ±1.32E+02        | ±4.92E+02        | ±4.80E+02 |
| F29 | 5.20E+03  | 5.07E+03  | 4.28E+03  | 7.04E+03  | 5.03E+04  | 1.10E+05  | <b>4.06E+03</b>  | 4.62E+03         | 4.93E+03         | 4.32E+03         | 5.73E+03  |
|     | ±2.35E+02 | ±3.18E+02 | ±1.88E+02 | ±4.70E+02 | ±9.37E+04 | ±6.06E+04 | <b>±1.72E+02</b> | ±4.78E+02        | ±3.44E+02        | ±3.01E+02        | ±3.32E+02 |
| F30 | 6.89E+06  | 9.99E+07  | 2.96E+06  | 1.05E+09  | 7.63E+09  | 9.29E+09  | <b>1.03E+06</b>  | 6.57E+06         | 2.38E+06         | 7.63E+07         | 2.48E+07  |
|     | ±3.00E+06 | ±1.08E+07 | ±1.19E+06 | ±3.34E+08 | ±2.82E+09 | ±2.45E+09 | <b>±3.13E+05</b> | ±7.35E+06        | ±5.06E+05        | ±3.29E+07        | ±8.15E+06 |



# Supplementary Material L

**Table S31.** The running time (seconds) of 11 compared NIOAs when D=10 and D=50

| NIOAs |      | DE         | CS          | HS    | GSA    | GWO   | ABC   | PSO   | FA     | GA   | BA    | IA    |
|-------|------|------------|-------------|-------|--------|-------|-------|-------|--------|------|-------|-------|
|       |      | Functions  |             |       |        |       |       |       |        |      |       |       |
| F1    | D=10 | <b>4.6</b> | 9.5         | 11.9  | 110.2  | 10.8  | 15.2  | 9.3   | 242.2  | 11.6 | 17.8  | 13.0  |
|       | D=50 | 73.2       | <b>55.3</b> | 144.1 | 960.7  | 334.1 | 173.7 | 179.2 | 1586.2 | 86.8 | 106.7 | 250.6 |
| F2    | D=10 | <b>4.9</b> | 9.8         | 12.2  | 109.9  | 11.0  | 15.5  | 9.5   | 247.0  | 11.3 | 18.0  | 13.4  |
|       | D=50 | 77.7       | <b>61.8</b> | 136.9 | 937.2  | 338.8 | 179.7 | 195.1 | 1659.3 | 94.0 | 111.7 | 265.3 |
| F3    | D=10 | <b>4.7</b> | 9.7         | 12.1  | 109.8  | 10.9  | 15.4  | 9.4   | 244.8  | 11.6 | 17.9  | 13.0  |
|       | D=50 | 73.0       | <b>55.4</b> | 136.6 | 914.1  | 338.6 | 178.6 | 188.9 | 1608.2 | 97.0 | 107.6 | 262.6 |
| F4    | D=10 | <b>4.6</b> | 9.6         | 12.0  | 109.3  | 10.7  | 15.3  | 9.3   | 241.4  | 10.7 | 17.8  | 12.9  |
|       | D=50 | 72.7       | <b>55.2</b> | 138.3 | 915.4  | 348.1 | 174.9 | 189.7 | 1599.1 | 89.2 | 106.3 | 249.6 |
| F5    | D=10 | <b>4.7</b> | 9.7         | 12.1  | 109.4  | 11.0  | 15.5  | 9.4   | 248.1  | 9.8  | 18.0  | 12.9  |
|       | D=50 | 75.1       | <b>57.0</b> | 139.2 | 917.0  | 307.0 | 178.9 | 191.3 | 1480.5 | 84.3 | 110.1 | 252.3 |
| F6    | D=10 | <b>5.4</b> | 10.3        | 12.6  | 110.5  | 11.4  | 16.2  | 9.9   | 255.5  | 10.0 | 18.9  | 13.4  |
|       | D=50 | 94.1       | <b>74.1</b> | 151.6 | 936.8  | 318.1 | 197.4 | 201.0 | 1510.6 | 93.7 | 131.2 | 283.4 |
| F7    | D=10 | <b>4.9</b> | 9.7         | 12.2  | 110.0  | 11.1  | 15.6  | 9.6   | 247.0  | 10.0 | 18.3  | 12.8  |
|       | D=50 | 75.7       | <b>57.6</b> | 140.3 | 910.9  | 340.0 | 179.4 | 191.4 | 1500.7 | 85.5 | 116.2 | 251.9 |
| F8    | D=10 | <b>4.7</b> | 9.6         | 12.1  | 111.0  | 11.0  | 15.5  | 9.5   | 245.6  | 9.6  | 18.1  | 12.8  |
|       | D=50 | 75.8       | <b>57.4</b> | 141.0 | 912.0  | 347.6 | 179.8 | 190.5 | 1494.1 | 84.6 | 122.6 | 252.6 |
| F9    | D=10 | <b>5.0</b> | 9.8         | 12.1  | 109.6  | 11.1  | 15.7  | 9.6   | 248.6  | 11.0 | 18.3  | 13.1  |
|       | D=50 | 63.2       | <b>47.6</b> | 133.1 | 908.3  | 291.3 | 184.5 | 136.2 | 1501.8 | 65.6 | 112.0 | 264.9 |
| F10   | D=10 | <b>5.1</b> | 9.9         | 12.3  | 7343.3 | 11.2  | 15.8  | 9.7   | 252.9  | 10.2 | 18.5  | 13.3  |
|       | D=50 | 86.6       | <b>67.1</b> | 147.8 | 905.3  | 352.4 | 188.6 | 196.2 | 1505.8 | 88.9 | 133.9 | 265.4 |
| F11   | D=10 | <b>4.8</b> | 9.6         | 12.2  | 109.5  | 11.0  | 15.6  | 9.6   | 248.8  | 10.6 | 18.2  | 13.2  |
|       | D=50 | 76.3       | <b>57.8</b> | 143.5 | 908.5  | 346.8 | 179.6 | 191.2 | 1500.2 | 87.1 | 122.9 | 265.1 |
| F12   | D=10 | <b>4.9</b> | 9.7         | 12.2  | 110.6  | 11.1  | 15.7  | 9.6   | 261.0  | 11.3 | 18.4  | 13.2  |
|       | D=50 | 81.6       | <b>60.8</b> | 144.6 | 906.4  | 350.4 | 182.9 | 193.6 | 1502.9 | 94.6 | 126.3 | 258.8 |
| F13   | D=10 | <b>4.8</b> | 9.7         | 12.1  | 111.1  | 11.1  | 15.6  | 9.6   | 256.0  | 10.6 | 18.2  | 13.3  |
|       | D=50 | 75.2       | <b>58.0</b> | 143.2 | 903.7  | 344.7 | 178.7 | 191.5 | 1500.4 | 87.2 | 122.2 | 255.4 |
| F14   | D=10 | <b>5.0</b> | 9.9         | 12.3  | 111.4  | 11.2  | 15.8  | 9.8   | 258.7  | 10.2 | 18.5  | 13.5  |
|       | D=50 | 81.6       | <b>62.8</b> | 143.6 | 910.3  | 349.4 | 186.6 | 194.3 | 1504.1 | 88.9 | 128.7 | 273.7 |
| F15   | D=10 | <b>4.8</b> | 9.7         | 12.1  | 110.5  | 11.0  | 15.6  | 9.6   | 255.3  | 10.4 | 18.2  | 13.2  |
|       | D=50 | 75.1       | <b>57.6</b> | 142.4 | 913.7  | 346.8 | 178.5 | 191.3 | 1496.5 | 86.3 | 120.9 | 252.9 |
| F16   | D=10 | <b>5.0</b> | 9.8         | 12.2  | 111.4  | 11.2  | 15.7  | 9.7   | 258.1  | 10.2 | 18.5  | 13.1  |
|       | D=50 | 78.0       | <b>60.2</b> | 144.3 | 901.5  | 348.7 | 182.8 | 191.9 | 1621.2 | 87.6 | 124.7 | 256.2 |
| F17   | D=10 | <b>5.5</b> | 10.4        | 12.7  | 110.8  | 11.5  | 16.1  | 10.0  | 266.6  | 10.5 | 19.1  | 13.6  |
|       | D=50 | 93.4       | <b>74.4</b> | 156.3 | 914.4  | 359.5 | 183.6 | 169.0 | 1696.4 | 96.6 | 144.8 | 287.8 |
| F18   | D=10 | <b>4.9</b> | 9.7         | 12.2  | 110.3  | 11.1  | 15.7  | 9.6   | 256.5  | 10.4 | 18.3  | 13.2  |

|     |      |            |              |       |       |       |       |       |        |       |       |        |
|-----|------|------------|--------------|-------|-------|-------|-------|-------|--------|-------|-------|--------|
|     | D=50 | 76.0       | <b>58.6</b>  | 145.3 | 901.8 | 347.8 | 181.7 | 197.9 | 1523.8 | 88.9  | 123.1 | 263.4  |
| F19 | D=10 | <b>7.6</b> | 12.5         | 13.7  | 111.4 | 12.5  | 17.1  | 11.0  | 292.5  | 11.5  | 20.9  | 15.9   |
|     | D=50 | 160.5      | <b>133.8</b> | 192.0 | 982.3 | 398.7 | 249.7 | 267.5 | 2773.8 | 135.4 | 218.7 | 383.6  |
| F20 | D=10 | <b>5.6</b> | 10.5         | 12.6  | 110.8 | 11.5  | 16.2  | 10.1  | 267.4  | 10.2  | 19.0  | 13.6   |
|     | D=50 | 96.9       | <b>77.7</b>  | 158.9 | 928.6 | 360.2 | 201.5 | 236.0 | 1926.8 | 97.2  | 148.2 | 287.7  |
| F21 | D=10 | <b>5.2</b> | 10.1         | 12.3  | 116.1 | 11.3  | 15.9  | 9.8   | 260.5  | 9.9   | 18.4  | 13.3   |
|     | D=50 | 91.2       | 70.0         | 156.5 | 924.6 | 355.3 | 195.1 | 240.9 | 1770.6 | 92.3  | 140.5 | 2782.6 |
| F22 | D=10 | <b>5.7</b> | 10.5         | 12.7  | 110.3 | 11.6  | 16.1  | 10.0  | 266.6  | 10.6  | 19.0  | 13.7   |
|     | D=50 | 100.5      | <b>78.8</b>  | 161.9 | 931.2 | 360.1 | 203.1 | 239.5 | 1744.4 | 97.6  | 153.3 | 288.6  |
| F23 | D=10 | <b>5.7</b> | 10.6         | 12.8  | 110.1 | 11.6  | 16.2  | 102.6 | 267.1  | 10.3  | 19.0  | 13.8   |
|     | D=50 | 104.7      | <b>76.6</b>  | 164.8 | 930.3 | 364.2 | 205.8 | 239.8 | 1751.2 | 99.8  | 158.5 | 295.2  |
| F24 | D=10 | <b>5.5</b> | 10.3         | 12.5  | 110.1 | 11.5  | 16.0  | 9.9   | 264.0  | 10.2  | 18.7  | 13.5   |
|     | D=50 | 100.2      | <b>67.8</b>  | 162.7 | 926.2 | 362.7 | 202.5 | 236.4 | 1583.3 | 98.0  | 136.5 | 293.0  |
| F25 | D=10 | <b>5.4</b> | 10.3         | 12.4  | 110.0 | 11.4  | 15.9  | 9.9   | 263.6  | 10.5  | 18.7  | 13.3   |
|     | D=50 | 98.0       | <b>65.8</b>  | 159.2 | 915.4 | 360.5 | 199.6 | 234.4 | 1566.7 | 99.9  | 135.2 | 286.8  |
| F26 | D=10 | <b>5.9</b> | 10.8         | 12.8  | 110.2 | 11.7  | 16.2  | 10.2  | 270.9  | 10.7  | 19.3  | 13.8   |
|     | D=50 | 112.7      | <b>78.0</b>  | 170.8 | 930.8 | 340.0 | 211.5 | 243.5 | 1812.6 | 104.7 | 150.3 | 306.6  |
| F27 | D=10 | <b>6.1</b> | 10.9         | 12.8  | 110.1 | 11.7  | 16.3  | 10.3  | 271.9  | 10.6  | 19.4  | 14.0   |
|     | D=50 | 121.3      | <b>83.2</b>  | 173.6 | 940.1 | 329.9 | 197.4 | 247.5 | 1864.2 | 108.1 | 156.2 | 317.1  |
| F28 | D=10 | <b>5.6</b> | 10.5         | 12.6  | 110.4 | 11.5  | 16.1  | 10.1  | 266.0  | 10.4  | 18.9  | 13.5   |
|     | D=50 | 107.4      | <b>74.3</b>  | 136.0 | 928.0 | 323.3 | 209.2 | 240.9 | 1711.3 | 103.5 | 143.3 | 299.6  |
| F29 | D=10 | <b>6.1</b> | 10.9         | 12.9  | 111.2 | 11.9  | 16.3  | 10.4  | 271.4  | 10.9  | 19.6  | 14.2   |
|     | D=50 | 109.6      | <b>75.7</b>  | 136.3 | 933.5 | 316.8 | 211.8 | 236.6 | 1762.9 | 105.2 | 146.9 | 321.1  |
| F30 | D=10 | <b>8.1</b> | 12.9         | 13.9  | 111.8 | 12.8  | 17.4  | 11.3  | 296.5  | 13.2  | 21.5  | 16.3   |
|     | D=50 | 169.8      | <b>130.0</b> | 165.4 | 992.7 | 292.5 | 268.2 | 236.6 | 4522.6 | 140.4 | 213.0 | 407.1  |
